# Supplementary material for: Climatic and societal impacts of volcanic eruptions in the Western Han Dynasty (206 BCE–8 CE): a comparative study.
Source: Copernicus journal article supplement (doi:10.5194/cp-21-2061-2025), 2025-11-07
Supplement: Supplementary file 3 [file Table S1 Climate records of the Western Han Dynasty- version 2.xlsx]

## Sheet: Notes
The Potential Climatic and Societal Impacts of Volcanic Eruptions in the Western Han Dynasty (206 BCE- 8CE): A Comparative Study
Invesitigator: Zhen Yang & Francis Ludlow
Translation: The references for the translations are provided in the relevant columns in the tables, where applicable. Records without information in the 'Translation Reference' column are translated by Zhen Yang.
Description and Notes:
Table S1 is the dataset of climate anomalies in historical sources of Western Han dynasty. 1) The events in those records are summarized in the summary column. 2) Translations of records from the two periods under study, 180-150 BCE and 60-30 BCE, are provided. 3) Translations from Ban G, Dubs HH (1938) The History of the Former Han Dynasty. Vol. 1: Waverly Press use the Wade–Giles system. To mai…
Table S2 contains texts regarding the major political and administrative changes during 180-150 BCE. Table S3 presents the major political and administrative changes during 60-30 BCE. 1) The Chinese texts are from historical sources. The English texts are translations of the Chinese texts. Some records are quotes from literature, and these are specified with notes and references. The rest of the …
Table S4 and S5 are records of harvests and population changes in the Western Han Dynasty.Although we have carefully examined the historical sources mentioned above, this dataset may not cover the complete records of the whole dynasty. It only represents all relevant records we could find in the historical documents and compilations we used. In Table S5, columns B–F (“direction”– “cause”): If a s…

## Sheet: Table S1
Year	month (Lunar calendar)	season	summary	location	area	original text	source	Translation (180-150BCEs) and (60-30 BCEs)	Translation Reference (if applicable)	references
-206
-205	4	summer	wind			(四月)楚又追擊(漢軍)至靈璧東睢水上。漢軍卻，爲楚所擠,多殺，漢卒十餘萬人皆入睢水，睢水爲之不流。圍漢王三匝。於是大風從西北而起，折木髮屋，揚沙石，窈冥晝晦，逢迎楚軍。楚軍大亂壞散，而漢王乃得與數十 騎遁去…...	Shiji, Biography of Xiangyu			Zhang, D.: A compendium of Chinese meteorological records of the last 3,000 years, Jiangsu Education Publishing House, Nanjing,2004.
	6	summer	famine		Guanzhong	六月，關中大飢，米斛萬錢，人相食。令民就食蜀漢。	Hanshu, The Annals of Emperor Gaozu			Zhang, D.: A compendium of Chinese meteorological records of the last 3,000 years, Jiangsu Education Publishing House, Nanjing,2004.
-204
-203
-202
-201
-200	10	winter	cold	Loufan		(十月，匈奴)攻太原，至晉陽下。高帝自將兵往擊之。會冬大寒雨雪，卒之墮指者十二三。於是冒頓佯敗走，誘漢兵。	Hanshu, Biography of Xiongnu			Zhang, D.: A compendium of Chinese meteorological records of the last 3,000 years, Jiangsu Education Publishing House, Nanjing,2004.
-199
-198
-197
-196
-195
-194
-193	1	spring	earthquake	Longxi	Northwest	惠帝二年正月，地震隴西，壓四百餘家。	Hanshu, Treatise on the Five Elements			Jiao, P., Liu, C., and He, Y.: The General History of Natural Disasters in China-the Volume of Qin and Han , Beijing Book co.INC, Beijing, 2009.
		summer	drought			夏旱。	Hanshu, The Annals of Emperor Hui			Zhang, D.: A compendium of Chinese meteorological records of the last 3,000 years, Jiangsu Education Publishing House, Nanjing,2004.
		winter	thunder	Yiyang		天雨血於宜陽，一頃所，劉向以爲赤眚也。時又冬雷，桃李華，常燠之罰也。	Hanshu, Treatise on the Five Elements			Zhang, D.: A compendium of Chinese meteorological records of the last 3,000 years, Jiangsu Education Publishing House, Nanjing,2004.
-192
-191
-190		summer	drought, river dried			夏，大旱，江河水少，溪谷絕。	Hanshu, Treatise on the Five Elements			Zhang, D.: A compendium of Chinese meteorological records of the last 3,000 years, Jiangsu Education Publishing House, Nanjing,2004.
-189
-188
-187
-186	1	spring	landslide, earthquake	Qiangdao, wududao		1) 高後二年正月，武都山崩，殺七百六十人，地震至八月乃止。 2) 春正月乙卯，地震，羌道、武都道山崩。	1) Hanshu, Treatise on the Five Elements 2) Hanshu, The Annals of Empress Lü Zhi			Jiao, P., Liu, C., and He, Y.: The General History of Natural Disasters in China-the Volume of Qin and Han , Beijing Book co.INC, Beijing, 2009.
-185		summer	flood, river overflow	Hanzhong, Nanjun		1) 夏，江水、漢水溢，流民四千餘家。 2) 夏，漢中、南郡大水，水出流四千餘家。	1) Hanshu, The Annals of Empress Lü Zhi 2) Hanshu, Treatise on the Five Elements			Zhang, D.: A compendium of Chinese meteorological records of the last 3,000 years, Jiangsu Education Publishing House, Nanjing,2004.
-184		autumn	flood, river overflow	Henan		秋，河南大水，伊、洛流千六百餘家，汝水流八百餘家。	Hanshu, Treatise on the Five Elements			Zhang, D.: A compendium of Chinese meteorological records of the last 3,000 years, Jiangsu Education Publishing House, Nanjing,2004.
-183
-182
-181			plague	Nanyue		(高后遣將軍隆慮侯竈擊南越)會暑溼，士卒大疫，兵不能逾嶺。	Hanshu, Biography of Xinan Yi, Liangyue and Chaoxian			Zhang, D.: A compendium of Chinese meteorological records of the last 3,000 years, Jiangsu Education Publishing House, Nanjing,2004.
-180		summer	flood, river overflow	Hanzhong, Nanjun, Nanyang		1)夏，漢中、南郡水復出，流六千餘家。南陽沔水流萬餘家。 2)夏，江水、漢水溢，流萬餘家。	1) Hanshu, Treatise on the Five Elements 2) Hanshu, The Annals of Empress Lü Zhi	1) In the summer, there were [river] floods in Hanzhong and Nanjun (commanderies) again, carrying away more than six thousand families. The Mian River (a branch of the Yangtze River) in Nanyang (commandery) carried away over ten thousand families. 2) ...in the summer, the Yangtze and Han Rivers overflowed, carrying away more than ten thousand families.	2) Ban G, Dubs H (1938) The history of the fomer Han dynasty. Waverly Press, Baltmore.	Zhang, D.: A compendium of Chinese meteorological records of the last 3,000 years, Jiangsu Education Publishing House, Nanjing,2004.
-179	4	summer	flood, earthquake, landslide	Qi and Chu	Guandong	四月，齊楚地震，二十九山同日崩，大水潰出。	Hanshu, The Annals of Emperor Wen	In the fourth month there was an earthquake in Qi and Chu. Twenty-nine mountains collapsed on the same day and floods came out from their sides or welled up.	Ban G, Dubs H (1938) The history of the fomer Han dynasty. Waverly Press, Baltmore.	Zhang, D.: A compendium of Chinese meteorological records of the last 3,000 years, Jiangsu Education Publishing House, Nanjing,2004.
			rain			文帝初多雨，積霖至百日而止。	Xijing Zaji (西京杂记）	At the beginning of the reign period of Emperor Wen, it rained heavily. The continuous rain stopped after 100 days.		Zhang, D.: A compendium of Chinese meteorological records of the last 3,000 years, Jiangsu Education Publishing House, Nanjing,2004.
-178	6	summer	wind	Shouchun		六月，淮南王都壽春，大風毀民室殺人。	Hanshu, Treatise on the Five Elements	In the sixth month, in Shouchun, the capital of the Kingdom Huainan, a fierce wind damaged houses and killed people.		Zhang, D.: A compendium of Chinese meteorological records of the last 3,000 years, Jiangsu Education Publishing House, Nanjing,2004.
-177		autumn	drought		everywhere	秋，天下旱。	Hanshu, Treatise on the Five Elements	In the autumn, there was a drought all over the empire.		Zhang, D.: A compendium of Chinese meteorological records of the last 3,000 years, Jiangsu Education Publishing House, Nanjing,2004.
-176	6	summer	snow			六月，大雨雪。	Hanshu, Treatise on the Five Elements	In the sixth month, there was heavy snow.		Zhang, D.: A compendium of Chinese meteorological records of the last 3,000 years, Jiangsu Education Publishing House, Nanjing,2004.
-175			wind, rain	Wu		文帝五年，吳暴風雨，壞城官府民室。	Hanshu, Treatise on the Five Elements	In the fifth year of Emperor Wen's reign period, there was a fierce storm in the Kingdom of Wu, damaging town walls, government offices and houses [of common people].		Zhang, D.: A compendium of Chinese meteorological records of the last 3,000 years, Jiangsu Education Publishing House, Nanjing,2004.
	10	winter	wind	Pengcheng	Guandong	十月，楚王都彭城大風從東南來，毀市門殺人。	Hanshu, Treatise on the Five Elements	In the tenth month, in Pengcheng, the capital of the Kingdom Chu, a great wind came blowing from the southeast destroying gates and killing people.		Zhang, D.: A compendium of Chinese meteorological records of the last 3,000 years, Jiangsu Education Publishing House, Nanjing,2004.
-174
-173
-172
-171		spring	drought			春，大旱。	Hanshu, The Annals of Emperor Wen	In the spring, there was a great drought.		Zhang, D.: A compendium of Chinese meteorological records of the last 3,000 years, Jiangsu Education Publishing House, Nanjing,2004.
-170
-169			earthquake	Dai		上幸代，地動。	Shiji, Table of meritorious officials during the reigns of (Emperors) Gao, Hui, Wen and Empress Gao	The emperor visited the Kingdom of Dai. There was an earthquake.		Jiao, P., Liu, C., and He, Y.: The General History of Natural Disasters in China-the Volume of Qin and Han , Beijing Book co.INC, Beijing, 2009.
-168	12	winter	flood, river overflow	Suanzao		(十二月）河決酸棗，東潰金堤，於是東郡大興卒塞之。	Hanshu, Treatise on Rivers and Canals	(In the 12th month), the Yellow River overflowed its banks at Suanzao (county) and destroyed the Jin Embankment east of there. Thus, a large force of labours was called up in the Dong Commandery to repair the break.	This translation references a similar record in Sima Q, Watson B(1993) Records of the Grand Historian. Columbia University Press, New York.	Zhang, D.: A compendium of Chinese meteorological records of the last 3,000 years, Jiangsu Education Publishing House, Nanjing,2004.
-167
-166
-165			flood, river overflow			平言曰：「周鼎亡在泗水中，今河溢通泗，臣望東北汾陰直有金寶氣，意周鼎其出乎？兆見不迎則不至。」於是上使使治廟汾陰南，臨河，欲祠出周鼎。	Shiji, The Treatise on the Feng and Shan Sacrifices	(Xinyuan Ping announced), “The cauldrons of the Zhou dynasty were lost in the Si River. Now the Yellow River has overflowed and runs into the Si. Observing the sky in the northeast, I note that there are certain emanations right over Fenyin which indicate the presence of precious metal objects. That, I believe, is where the cauldrons will be found. When such an omen appears, however, unless some …	Sima Q, Watson B(1993) Records of the Grand Historian. Columbia University Press, New York.	Jiao, P., Liu, C., and He, Y.: The General History of Natural Disasters in China-the Volume of Qin and Han , Beijing Book co.INC, Beijing, 2009.
-164
-163			flood, drought, plague, poor harvest			詔曰：「間者數年比不登，又有水旱疾疫之災，朕甚憂之。愚而不明，未達其咎。意者朕之政有所失而行有過與？乃天道有不順，地利或不得，人事多失和，鬼神廢不享與？何以致此？將百官之奉養或費，無用之事或多與？何其民食之寡乏也！夫度田非益寡，而計民未加益，以口量地，其於古猶有餘，而食之甚不足者，其咎安在？無乃百姓之從事於末以害農者蕃，為酒醪以靡穀者多，六畜之食焉者眾與？細大之義，吾未能得其中。其與丞相列侯吏二千石博士議之，有可以佐百姓者，率意遠思，無有所隱。」	Hanshu, The Annals of Emperor Wen	An imperial edict said, "Recently for many years there have continually been no good harvests. Moreover there have been visitations of floods, droughts, sickness, and epidemics. I have been very much worried because of them. I am ignorant and not perspicacious and do not yet understand just what is to blame. I have been thinking: is there some fault in my [way of] government or is there some defe…	Ban G, Dubs H (1938) The history of the fomer Han dynasty. Waverly Press, Baltmore.	Zhang, D.: A compendium of Chinese meteorological records of the last 3,000 years, Jiangsu Education Publishing House, Nanjing,2004.
-162			earthquake			地動	Shiji, Table of meritorious officials during the reigns of (Emperors) Gao, Hui, Wen and Empress Gao	There was an earthquake.		Jiao, P., Liu, C., and He, Y.: The General History of Natural Disasters in China-the Volume of Qin and Han , Beijing Book co.INC, Beijing, 2009.
-161		autumn	rain, flood	Lantian [county]		秋，大雨，晝夜不絕三十五日。藍田山水出，流九百餘家。漢水出，壞民室八千餘所，殺三百餘人。	Hanshu, Treatise on the Five Elements	In the autumn there was a great rain day and night, which did not end until the thirty-fifth day. In the Lantian [county] the rivers from the mountains carried away more than nine hundred families and the Han [River] destroyed the houses of more than eight thousand common people. More than three hundred people were killed.	Ban G, Dubs H (1938) The history of the fomer Han dynasty. Waverly Press, Baltmore.	Zhang, D.: A compendium of Chinese meteorological records of the last 3,000 years, Jiangsu Education Publishing House, Nanjing,2004.
-160
-159
-158		spring	drought		everywhere	春，天下大旱。	Hanshu, Treatise on the Five Elements	In the spring, there was a great drought all over the empire.		Zhang, D.: A compendium of Chinese meteorological records of the last 3,000 years, Jiangsu Education Publishing House, Nanjing,2004.
	4	summer	drought, locust			四月，大旱，蝗。令諸侯無人貢，弛山澤，減諸服禦，損郎吏員，發倉庾以振民，民得賣爵。	Hanshu, The Annals of Emperor Wen	In the summer, the fourth month, there was a great drouth and locusts. [The Emperor] ordered that the nobles should not pay tribute. He opened [to the common people] the mountains and marshes, reduced the [imperial] robes and the imperial officers, diminished the [regular] number of Gentlemen and officials, and opened the granaries in order to succor the people. The people were allowed to sell [a…	Ban G, Dubs H (1938) The history of the fomer Han dynasty. Waverly Press, Baltmore.	Zhang, D.: A compendium of Chinese meteorological records of the last 3,000 years, Jiangsu Education Publishing House, Nanjing,2004.
-157			hail			文帝即位二十三年，雨雹如桃李，深者厚三尺。	Fengsu Tongyi (風俗通義)	In the twenty-third year after Emperor Wen's enthronement, there was a fall of hail. [The hailstones] were as big as peaches and plums and penetrated three chi into the ground (a measurement unit, one Chi approximately equals 23.1 cm today).		Zhang, D.: A compendium of Chinese meteorological records of the last 3,000 years, Jiangsu Education Publishing House, Nanjing,2004.
-156	1		poor harvest, famine			春正月，詔曰：「間者歲比不登，民多乏食，夭絕天年，朕甚痛之。郡國或磽陿，無所農桑毄畜；或地饒廣，薦草莽，水泉利，而不得徙。其議民欲徙寬大地者，聽之。」	Hanshu, The Annals of Emperor Jing	In the spring, the first month, an imperial edict said, "Recently, for successive years there have not been good harvests, so that many people are lacking food; early death is cutting short their natural [span of] years. I am very much pained at this [circumstance]. In some of the commanderies and kingdoms there are stony and narrow [regions] and there is no place for agriculture or sericulture o…	Ban G, Dubs H (1938) The history of the fomer Han dynasty. Waverly Press, Baltmore.	Zhang, D.: A compendium of Chinese meteorological records of the last 3,000 years, Jiangsu Education Publishing House, Nanjing,2004.
-155		summer	hail	Hengshan		秋，衡山雨雹，大者五寸，深者二尺。	Shiji, The Basic Annals of Emperor Jing	In the autumn hail fell in Hengshan; the hailstones measured as much as five cun (a measurement unit, 1 cun equals approximately 2.31 cm today) and penetrated two chi into the ground.	Sima Q, Watson B(1993) Records of the Grand Historian. Columbia University Press, New York.	Zhang, D.: A compendium of Chinese meteorological records of the last 3,000 years, Jiangsu Education Publishing House, Nanjing,2004.
			drought	west of Shangjun	central and northwest	(孝景二年)......其後，上郡以西旱，復修賣爵令，而裁其賈以招民。	Hanshu, Treatise on Food and Money	(In the second year of the reign of the emperor Jing)...When sometime afterwards, in the commandery of Shang and to the westward, there was a drought, the ordinance for sale of rank was again revised, its cost, however, being cut in order to attract the people.	Ban G, Swann NL (2013) Food and Money in Ancient China: The Earliest Economic History of China to A. D. 25 [Han Shu 24]. Martino Publishing	Zhang, D.: A compendium of Chinese meteorological records of the last 3,000 years, Jiangsu Education Publishing House, Nanjing,2004.
-154
-153
-152	5	summer	wind	Jiangdu		五月，江都大暴風從西方來，壞城十二丈。	Shiji, The Basic The Annals of Emperor Jing	At Jiangdu a violent wind blew up from the west and destroyed the city wall for a length of twelve spans.	Sima Q, Watson B(1993) Records of the Grand Historian. Columbia University Press, New York.	Zhang, D.: A compendium of Chinese meteorological records of the last 3,000 years, Jiangsu Education Publishing House, Nanjing,2004.
-151	12	winter	rain, thunder			十二月，雷，霖雨。	Hanshu, The Annals of Emperor Jing	...the twelfth month, there was thunder and prolonged rain.	Ban G, Dubs H (1938) The history of the fomer Han dynasty. Waverly Press, Baltmore.	Zhang, D.: A compendium of Chinese meteorological records of the last 3,000 years, Jiangsu Education Publishing House, Nanjing,2004.
-150
-149	4	summer	earthquake, hail			四月乙巳，赦天下，賜爵一級。除禁錮。地動。衡山、原都雨冰雹，大者尺八寸。	Shiji, The Basic Annals of Emperor Jing			Zhang, D.: A compendium of Chinese meteorological records of the last 3,000 years, Jiangsu Education Publishing House, Nanjing,2004.
-148
-147	4	summer	drought			夏旱，禁酤酒。 (秋九月，蝗。)	Hanshu, The Annals of Emperor Jing			Zhang, D.: A compendium of Chinese meteorological records of the last 3,000 years, Jiangsu Education Publishing House, Nanjing,2004.
	9	autumn	locust			秋九月，蝗。	Hanshu, The Annals of Emperor Jing			Zhang, D.: A compendium of Chinese meteorological records of the last 3,000 years, Jiangsu Education Publishing House, Nanjing,2004.
		autumn	drought			秋，大旱。	Hanshu, Treatise on the Five Elements			Zhang, D.: A compendium of Chinese meteorological records of the last 3,000 years, Jiangsu Education Publishing House, Nanjing,2004.
-146	3	spring	locust			三月，置德陽宮。大蝗。	Shiji, The Basic Annals of Emperor Jing			Zhang, D.: A compendium of Chinese meteorological records of the last 3,000 years, Jiangsu Education Publishing House, Nanjing,2004.
		summer	locust			夏，蝗。	Hanshu, The Annals of Emperor Jing			Zhang, D.: A compendium of Chinese meteorological records of the last 3,000 years, Jiangsu Education Publishing House, Nanjing,2004.
-145	6	summer	flood			六月丁巳，赦天下，賜爵一級。天下大潦。	Shiji, The Basic Annals of Emperor Jing			Zhang, D.: A compendium of Chinese meteorological records of the last 3,000 years, Jiangsu Education Publishing House, Nanjing,2004.
		autumn	earthquake			秋，地動。	Shiji, The Basic Annals of Emperor Jing			Jiao, P., Liu, C., and He, Y.: The General History of Natural Disasters in China-the Volume of Qin and Han , Beijing Book co.INC, Beijing, 2009.
-144	3	spring	hail			三月，雨雹。	Shiji, The Basic Annals of Emperor Jing			Zhang, D.: A compendium of Chinese meteorological records of the last 3,000 years, Jiangsu Education Publishing House, Nanjing,2004.
-143	5	summer	earthquake, plague			丙戌，地大動，鈴鈴然，民大疫死，棺貴，至秋止。	Hanshu, Treatise on Astronomy			Jiao, P., Liu, C., and He, Y.: The General History of Natural Disasters in China-the Volume of Qin and Han , Beijing Book co.INC, Beijing, 2009.
-142		spring	poor harvest, famine			1)春，以歲不登，禁內郡食馬粟，沒入之。 2) 為歲不登，禁天下食不造歲。	1)Hanshu, The Annals of Emperor Jing 2)Shiji, The Basic Annals of Emperor Jing			Zhang, D.: A compendium of Chinese meteorological records of the last 3,000 years, Jiangsu Education Publishing House, Nanjing,2004.
		autumn	drought, plague	Hengshan, Hedong and Yunzhong		1) 秋，大旱。 2) 大旱。衡山國、河東、雲中郡民疫。	1)Hanshu, The Annals of Emperor Jing 2)Shiji, The Basic Annals of Emperor Jing			Zhang, D.: A compendium of Chinese meteorological records of the last 3,000 years, Jiangsu Education Publishing House, Nanjing,2004.
-141
-140
-139
-138		spring	flood, river overflow, drought, famine	Pingyuan, Henei		1) 春，河水溢於平原，大饑，人相食。 2)「…...臣過河內，河內貧人傷水旱萬馀家，或父子相食，臣謹以便宜，持節發河內倉粟以振貧民。」	1)Hanshu, The Annals of Emperor Wu 2)Hanshu, Biography of Ji An			Zhang, D.: A compendium of Chinese meteorological records of the last 3,000 years, Jiangsu Education Publishing House, Nanjing,2004.
-137	6	summer	drought			六月，旱。	Hanshu, The Annals of Emperor Wu			Zhang, D.: A compendium of Chinese meteorological records of the last 3,000 years, Jiangsu Education Publishing House, Nanjing,2004.
			snow			大雪，松柏皆折。	Fuhou Gujin Zhu			Zhang, D.: A compendium of Chinese meteorological records of the last 3,000 years, Jiangsu Education Publishing House, Nanjing,2004.
-136	5	summer	locust			五月，大蝗。	Hanshu, The Annals of Emperor Wu			Zhang, D.: A compendium of Chinese meteorological records of the last 3,000 years, Jiangsu Education Publishing House, Nanjing,2004.
-135			locust, poor harvest			間者，數年歲比不登，民待賣爵贅子以接衣食，賴陛下德澤振救之，得毋轉死溝壑。四年不登，五年復蝗，民生未復。	Hanshu, Biography of Yan Zhu			Zhang, D.: A compendium of Chinese meteorological records of the last 3,000 years, Jiangsu Education Publishing House, Nanjing,2004.
-134	7	autumn	hail	Chang'an		七月，京师雨雹。	Xijing Zaji			Zhang, D.: A compendium of Chinese meteorological records of the last 3,000 years, Jiangsu Education Publishing House, Nanjing,2004.
-133
-132	5	summer	flood, river overflow	Puyang, Piaozi		1)春，河水徙，從頓丘東南流人渤海。五月，河水決濮陽，泛郡十六，發卒十萬救決河。 2)河決於瓤子，東南註鉅野，通於淮、泗。	1) Hanshu, The Annals of Emperor Wu 2) Shiji, The Treatise on the Yellow River and Canals			Zhang, D.: A compendium of Chinese meteorological records of the last 3,000 years, Jiangsu Education Publishing House, Nanjing,2004.
-131	12	winter	earthquake			十二月丁亥，地動。	Shiji, Table of meritorious officials during the reigns of (Emperors) Gao, Hui, Wen and Empress Gao			Jiao, P., Liu, C., and He, Y.: The General History of Natural Disasters in China-the Volume of Qin and Han , Beijing Book co.INC, Beijing, 2009.
	4	summer	frost			四月，隕霜殺草。	Hanshu, The Annals of Emperor Wu			Zhang, D.: A compendium of Chinese meteorological records of the last 3,000 years, Jiangsu Education Publishing House, Nanjing,2004.
	5	summer	earthquake			五月，地震，赦天下。	Hanshu, The Annals of Emperor Wu			Jiao, P., Liu, C., and He, Y.: The General History of Natural Disasters in China-the Volume of Qin and Han , Beijing Book co.INC, Beijing, 2009.
-130	7	autumn	wind			七月，大風拔木。	Hanshu, The Annals of Emperor Wu			Zhang, D.: A compendium of Chinese meteorological records of the last 3,000 years, Jiangsu Education Publishing House, Nanjing,2004.
	8	autumn	locust			八月，螟。	Hanshu, The Annals of Emperor Wu			Zhang, D.: A compendium of Chinese meteorological records of the last 3,000 years, Jiangsu Education Publishing House, Nanjing,2004.
-129		summer	drought, locust			夏，大旱，蝗。	Hanshu, The Annals of Emperor Wu			Zhang, D.: A compendium of Chinese meteorological records of the last 3,000 years, Jiangsu Education Publishing House, Nanjing,2004.
-128			poor harvest			(主父偃、徐樂皆上書言事:）「……間者關東五穀不登，年歲未復，民多窮睏，重之以邊境之事，推數循理而觀之，則民且有不安其處者矣。 不安故易動。」	Zizhi Tongjian, Han ji, Vol 18.			Zhang, D.: A compendium of Chinese meteorological records of the last 3,000 years, Jiangsu Education Publishing House, Nanjing,2004.
-127
-126
-125
-124		spring	drought			春，大旱。	Hanshu, The Annals of Emperor Wu			Zhang, D.: A compendium of Chinese meteorological records of the last 3,000 years, Jiangsu Education Publishing House, Nanjing,2004.
-123
-122	12	winter	cold, snow			十二月，大雨雪，民凍死。	Hanshu, The Annals of Emperor Wu			Zhang, D.: A compendium of Chinese meteorological records of the last 3,000 years, Jiangsu Education Publishing House, Nanjing,2004.
-121
-120			flood, famine	Shandong	Guandong	1) 遣謁者勸有水災郡種宿麥。舉吏民能假貸貧民者以名聞。 2)山東被水災，民多饑乏，於是天子遣使者虛郡國倉座以振貧民。猶不足，又募豪富人相貸假。尚不能相救，乃徙貧民於關以西，及充朔方以南新秦中，七十余萬口，衣食皆仰給縣官。數歲，假予產業，使者分部護之，冠蓋相望。其費以億計，不可勝數。於是縣官大空。	1)Hanshu, The Annals of Emperor Wu 2) Shiji, The Treatise on the Balanced Standard			Zhang, D.: A compendium of Chinese meteorological records of the last 3,000 years, Jiangsu Education Publishing House, Nanjing,2004.
		summer	drought			夏，大旱。	Hanshu, Treatise on the Five Elements			Zhang, D.: A compendium of Chinese meteorological records of the last 3,000 years, Jiangsu Education Publishing House, Nanjing,2004.
-119
-118
-117
-116
-115	3	spring	snow			三月，雪，平地厚五尺。	Hanshu, Treatise on the Five Elements			Zhang, D.: A compendium of Chinese meteorological records of the last 3,000 years, Jiangsu Education Publishing House, Nanjing,2004.
		summer	flood, poor harvest, famine	Shandong; Pingyuan, Bohai, Taishan, Dong Jun	Guandong	1)夏，大水，關東餓死者以千數。 2)山東被河災，及歲不登數年，人或相食，方一二千裏。天子憐之，詔曰：「江南火耕水耨,令饑民得流就食江淮間，欲留，留處。」遣使冠蓋相屬於道，護之，下巴蜀粟以振之。 3)平原、勃海、太山、東郡溥被災害，民餓死於道路。	1) Hanshu, The Annals of Emperor Wu 2) Shiji, The Treatise on the Balanced Standard 3) Hanshu, Biography of Wei Xiang			Zhang, D.: A compendium of Chinese meteorological records of the last 3,000 years, Jiangsu Education Publishing House, Nanjing,2004.
	9	autumn	flood, famine		Jiangnan	秋九月，詔曰：「仁不異逺，義不辭難。今京師雖未為豐年，山林池澤之饒與民共之。今水澇移於江南，迫隆冬至，朕懼其饑寒不活。江南之地，火耕水耨，方下巴蜀之粟致之江陵，遣博士中等分循行，諭告所抵，無令重困。吏民有振救飢民免其厄者，具舉以聞。」	Hanshu, The Annals of Emperor Wu			Zhang, D.: A compendium of Chinese meteorological records of the last 3,000 years, Jiangsu Education Publishing House, Nanjing,2004.
-114	3	spring	cold, snow, famine		Guandong	三月水冰，四月雨雪，關東十餘郡人相食。	Hanshu, Treatise on the Five Elements			Zhang, D.: A compendium of Chinese meteorological records of the last 3,000 years, Jiangsu Education Publishing House, Nanjing,2004.
-113
-112		autumn	locust			秋，蝗。	Hanshu, Treatise on the Five Elements			Zhang, D.: A compendium of Chinese meteorological records of the last 3,000 years, Jiangsu Education Publishing House, Nanjing,2004.
-111
-110			drought			是歲小旱，上令官求雨。	Shiji, The Treatise on the Balanced Standard			Zhang, D.: A compendium of Chinese meteorological records of the last 3,000 years, Jiangsu Education Publishing House, Nanjing,2004.
-109		summer	drought			夏，旱。	Shiji, The Basic Annals of Emperor Wu			Zhang, D.: A compendium of Chinese meteorological records of the last 3,000 years, Jiangsu Education Publishing House, Nanjing,2004.
			cold, snow	Sanfu	Guanzhong	大寒，雪深五尺，野鳥獸皆死，牛馬皆卷縮如猬，三輔人民凍死者十有二三。	Xijing Zaji			Zhang, D.: A compendium of Chinese meteorological records of the last 3,000 years, Jiangsu Education Publishing House, Nanjing,2004.
			flood, poor harvest	Liang and Chu		自河決瓠子後二十餘歲，歲因以數不登，而梁楚之地尤甚。天子乃使汲仁、郭昌發卒數萬人塞瓠子決。於是卒塞瓠子，築宮其上，名曰宣房宮。而道河北行二渠，復禹舊跡。而楚、梁之地復寧，無水災。	Shiji, The Treatise on the Yellow River and Canals			Zhang, D.: A compendium of Chinese meteorological records of the last 3,000 years, Jiangsu Education Publishing House, Nanjing,2004.
-108	12	winter	thunder, hail			十二月，雷，雨雹，大如馬頭。	Hanshu, Treatise on the Five Elements			Zhang, D.: A compendium of Chinese meteorological records of the last 3,000 years, Jiangsu Education Publishing House, Nanjing,2004.
		summer	drought			1) 是岁旱。 2)夏，旱。公孫卿曰：「黃帝時封則天旱，乾封三年。」上乃下詔曰：「天旱，意乾封乎？其令天下尊祠靈星焉。」	1) Hanshu, Treatise on Sacrifices 2) Shiji, The Basic Annals of Emperor Wu			1)Zhang, D.: A compendium of Chinese meteorological records of the last 3,000 years, Jiangsu Education Publishing House, Nanjing,2004.
			flood, river overflow			自塞宣房後，河復北決於館陶，分為屯氏河，東北經魏郡、清河、信都、勃海入海，廣深與大河等，故因其自然，不隄塞也。	Hanshu, Treatise on Rivers and Canals			Jiao, P., Liu, C., and He, Y.: The General History of Natural Disasters in China-the Volume of Qin and Han , Beijing Book co.INC, Beijing, 2009.
-107		summer	drought			夏，大旱，民多暍死。	Hanshu, The Annals of Emperor Wu			Zhang, D.: A compendium of Chinese meteorological records of the last 3,000 years, Jiangsu Education Publishing House, Nanjing,2004.
			flood, river overflow		Guandong (over 10 commanderies)	元封四年，關東流民二百萬口，無名數者四十萬，公卿議欲請徙流民於邊以適之......慶慚不任職，上書曰：「臣幸得待罪丞相，疲駑無以輔治。城郭倉廩空虛，民多流亡，罪當伏斧質，上不忍致法。願歸丞相侯印，乞骸骨歸，避賢者路。」 上報曰：「間者，河水滔陸，泛濫十餘郡，隄防勤勞，弗能讯塞，朕甚憂之......故為流民法，以禁重賦......委任有司，然則官曠民愁，盜賊公行。......今流民愈多，計文不改，君不繩責長吏，而請以興徙四十萬口，搖蕩百姓......」	Hanshu, Biography of Shi Qing			Zhang, D.: A compendium of Chinese meteorological records of the last 3,000 years, Jiangsu Education Publishing House, Nanjing,2004.
-106
-105	5	summer	drought			五月，旱。女及巫丈夫不入市也。	Fuhou Gujin Zhu			Zhang, D.: A compendium of Chinese meteorological records of the last 3,000 years, Jiangsu Education Publishing House, Nanjing,2004.
		autumn	drought, locust			秋，大旱，蝗。	Hanshu, The Annals of Emperor Wu			Zhang, D.: A compendium of Chinese meteorological records of the last 3,000 years, Jiangsu Education Publishing House, Nanjing,2004.
-104	8	autumn	locust	Dunhuang, Dayuan	Northwest	1) 八月，蝗從東方飛至敦煌。 2) 是歲，西伐大宛，蝗大起.	1) Hanshu, The Annals of Emperor Wu 2) Shiji, The Basic Annals of Emperor Wu			Zhang, D.: A compendium of Chinese meteorological records of the last 3,000 years, Jiangsu Education Publishing House, Nanjing,2004.
		winter	cold, snow		Regions of Xiongnu activity	冬，匈奴大雨雪，畜多飢寒死。	Shiji, the Account of the Xiongnu			Zhang, D.: A compendium of Chinese meteorological records of the last 3,000 years, Jiangsu Education Publishing House, Nanjing,2004.
-103		autumn	locust			秋，蝗。	Hanshu, The Annals of Emperor Wu			Zhang, D.: A compendium of Chinese meteorological records of the last 3,000 years, Jiangsu Education Publishing House, Nanjing,2004.
-102		autumn	locust			秋，复蝗。	Hanshu, Treatise on the Five Elements			Zhang, D.: A compendium of Chinese meteorological records of the last 3,000 years, Jiangsu Education Publishing House, Nanjing,2004.
-101
-100		summer	drought			三月，天雨白毛。夏，大旱。 (按：時以旱災頻繁，改元「天漢」。)	Hanshu, Treatise on the Five Elements			Zhang, D.: A compendium of Chinese meteorological records of the last 3,000 years, Jiangsu Education Publishing House, Nanjing,2004.
-99
-98		summer	drought			夏，大旱。八月，天雨白粍。	Hanshu, Treatise on the Five Elements			Zhang, D.: A compendium of Chinese meteorological records of the last 3,000 years, Jiangsu Education Publishing House, Nanjing,2004.
-97
-96
-95		autumn	drought			秋，旱。九月，募死罪入贖錢五十萬減死一等。	Hanshu, The Annals of Emperor Wu			Zhang, D.: A compendium of Chinese meteorological records of the last 3,000 years, Jiangsu Education Publishing House, Nanjing,2004.
-94
-93
-92		summer	drought			夏，大旱。	Hanshu, Treatise on the Five Elements			Zhang, D.: A compendium of Chinese meteorological records of the last 3,000 years, Jiangsu Education Publishing House, Nanjing,2004.
-91	4	summer	wind			夏四月，大風發屋折木。	Hanshu, The Annals of Emperor Wu			Zhang, D.: A compendium of Chinese meteorological records of the last 3,000 years, Jiangsu Education Publishing House, Nanjing,2004.
	8	autumn	earthquake			武帝征和二年八月癸亥，地震，厭殺人。	Hanshu, Treatise on the Five Elements			Jiao, P., Liu, C., and He, Y.: The General History of Natural Disasters in China-the Volume of Qin and Han , Beijing Book co.INC, Beijing, 2009.
-90		autumn	locust			秋，蝗。	Hanshu, The Annals of Emperor Wu			Zhang, D.: A compendium of Chinese meteorological records of the last 3,000 years, Jiangsu Education Publishing House, Nanjing,2004.
-89			snow, plague, poor harvest		Regions of Xiongnu activity	遂屠貳師以祠。會連雨雪數月，畜產死，人民疫病，穀稼不孰，單于恐，為貳師立祠室。	Hanshu, Biography of Xiongnu			Zhang, D.: A compendium of Chinese meteorological records of the last 3,000 years, Jiangsu Education Publishing House, Nanjing,2004.
		summer	locust			夏，蝗。	Hanshu, Treatise on the Five Elements			Zhang, D.: A compendium of Chinese meteorological records of the last 3,000 years, Jiangsu Education Publishing House, Nanjing,2004.
-88	7	autumn	earthquake			秋七月，地震，往往湧泉出。	Hanshu, The Annals of Emperor Wu			Jiao, P., Liu, C., and He, Y.: The General History of Natural Disasters in China-the Volume of Qin and Han , Beijing Book co.INC, Beijing, 2009.
-87
-86	7	autumn	rain, flood		the Wei [River] Bridge (in Guanzhong)	1) 七月，大水，雨自七月至十月。 2) 七月，大雨，渭橋絕。冬，無冰。	1) Hanshu, Treatise on the Five Elements 2)Hanshu, The Annals of Emperor Zhao			Zhang, D.: A compendium of Chinese meteorological records of the last 3,000 years, Jiangsu Education Publishing House, Nanjing,2004.
-85		autumn	locust		everywhere	秋，蝗，遍天下。	Hanshu, Treatise on the Five Elements			Zhang, D.: A compendium of Chinese meteorological records of the last 3,000 years, Jiangsu Education Publishing House, Nanjing,2004.
-84
-83	7	autumn	poor harvest, famine			秋七月，詔曰：「比歲不登，民匱於食，流庸未盡還，往時令民共出馬，其止勿出。諸給中都官者，且減之。」	Hanshu, The Annals of Emperor Zhao			Zhang, D.: A compendium of Chinese meteorological records of the last 3,000 years, Jiangsu Education Publishing House, Nanjing,2004.
-82
-81		summer	drought			夏，旱，大雩，大得舉火。	Hanshu, The Annals of Emperor Zhao			Zhang, D.: A compendium of Chinese meteorological records of the last 3,000 years, Jiangsu Education Publishing House, Nanjing,2004.
-80			wind, rain	Ji (Yan)	east	燕王都薊大風雨，拔宮中樹七圍以上十六枚，壞城樓。	Hanshu, Treatise on the Five Elements			Zhang, D.: A compendium of Chinese meteorological records of the last 3,000 years, Jiangsu Education Publishing House, Nanjing,2004.
-79
-78	1	spring	flood, famine			(正月)罷中牟苑賦貧民。詔曰：「乃者民被水災，頗匱於食，朕虛倉廩，使使者振困乏。其止四年毋漕。三年以前所振貸，非丞相御史所請，邊郡受牛者勿收責。」	Hanshu, The Annals of Emperor Zhao			Zhang, D.: A compendium of Chinese meteorological records of the last 3,000 years, Jiangsu Education Publishing House, Nanjing,2004.
	1	spring	landslide			孝昭元鳳三年正月，泰山萊蕪山南匈匈有數千人聲。民視之，有大石自立，高丈五尺，大四十八圍，入地深八尺，三石為足。石立處，有白烏數千集其旁。	Hanshu, Treatise on the Five Elements			Jiao, P., Liu, C., and He, Y.: The General History of Natural Disasters in China-the Volume of Qin and Han , Beijing Book co.INC, Beijing, 2009.
-77
-76		summer	drought			夏，大旱。	Hanshu, The Annals of Emperor Zhao			Zhang, D.: A compendium of Chinese meteorological records of the last 3,000 years, Jiangsu Education Publishing House, Nanjing,2004.
-75
-74
-73		summer	drought			夏大旱。	Wenxian Tongkao			Zhang, D.: A compendium of Chinese meteorological records of the last 3,000 years, Jiangsu Education Publishing House, Nanjing,2004.
	4	summer	earthquake			夏四月庚午，地震。詔內郡國舉文學高第各一人。	Hanshu, The Annals of Emperor Zhao			Jiao, P., Liu, C., and He, Y.: The General History of Natural Disasters in China-the Volume of Qin and Han , Beijing Book co.INC, Beijing, 2009.
-72
-71	5	summer	drought		everywhere (commanderies and kingdoms)	1)五月，大旱。郡國傷旱甚者，民毋出租賦。三輔民就賤者，且毋收事，盡四年。 2)夏，大旱，東西數千里。	1) Hanshu, The Annals of Emperor Xuan 2) Hanshu, Treatise on the Five Elements			Zhang, D.: A compendium of Chinese meteorological records of the last 3,000 years, Jiangsu Education Publishing House, Nanjing,2004.
		winter	cold, snow			其冬，單于自將萬騎擊烏孫，頗得老弱，欲還。會天大雨雪，一日深丈餘，人民畜產凍死，還者不能什一。	Hanshu, Biography of Xiongnu			Zhang, D.: A compendium of Chinese meteorological records of the last 3,000 years, Jiangsu Education Publishing House, Nanjing,2004.
-70	1	spring	poor harvest			四年春正月，詔曰：「蓋聞農者興德之本也，今歲不登，已遣使者振貸困乏。其令太官損膳省宰，樂府減樂人，使歸就農業。丞相以下至都官令丞上書入穀，輸長安倉，助貸貧民。民以車船載穀入關者，得毋用傳。」	Hanshu, The Annals of Emperor Xuan			Zhang, D.: A compendium of Chinese meteorological records of the last 3,000 years, Jiangsu Education Publishing House, Nanjing,2004.
	4	summer	earthquake, landslide	Beihai, Langya…	Guandong	1)夏四月壬寅，郡國四十九地震，或山崩水出。詔曰：「蓋災異者，天地之戒也。朕承洪業，奉宗廟，託于士民之上，未能和群生。乃者地震北海、琅邪，壞祖宗廟，朕甚懼焉。丞相、御史其與列侯、中二千石博問經學之士，有以應變，輔朕之不逮，毋有所諱。令三輔、太常、內郡國舉賢良方正各一人。律令有可蠲除以安百姓，條奏。被地震壞敗甚者，勿收租賦。」大赦天下。上以宗廟墮，素服，避正殿五日。 2)至四年夏，關東四十九郡同日地動，或山崩，壞城郭室屋，殺六千餘人。上乃素服，避正殿，遣使者弔問吏民，賜死者棺錢。	1) Hanshu, The Annals of Emperor Xuan 2) Hanshu, Biography of Xiahou Sheng			1) Jiao, P., Liu, C., and He, Y.: The General History of Natural Disasters in China-the Volume of Qin and Han , Beijing Book co.INC, Beijing, 2009.
-68			famine		Regions of Xiongnu activity	是歲也，匈奴飢，人民畜產死十六七。	Hanshu, Biography of Xiongnu			Zhang, D.: A compendium of Chinese meteorological records of the last 3,000 years, Jiangsu Education Publishing House, Nanjing,2004.
-67		summer	hail	capital		夏，京師雨雹。	Hanshu, Biography of Xiao Wangzhi			Zhang, D.: A compendium of Chinese meteorological records of the last 3,000 years, Jiangsu Education Publishing House, Nanjing,2004.
	9	autumn	earthquake			冬十月，詔曰：「乃者九月壬申地震，朕甚懼焉。有能箴朕過失，及賢良方正直言極諫之士以匡朕之不逮，毋諱有司。朕既不德，不能附遠，是以邊境屯戍未息。今復飭兵重屯，久勞百姓，非所以綏天下也。其罷車騎將軍、右將軍屯兵。」又詔曰：「池烃未御幸者，假與貧民。郡國宮館，勿復修治。流民還歸者，假公田，貸種、食，且勿算事。」	Hanshu, The Annals of Emperor Xuan			Jiao, P., Liu, C., and He, Y.: The General History of Natural Disasters in China-the Volume of Qin and Han , Beijing Book co.INC, Beijing, 2009.
-66	5	summer	hail	Shanyang		五月，山陽濟陰雨雹如雞子，深二尺五寸，殺二十人，蜚鳥皆死。	Hanshu, Treatise on the Five Elements			Zhang, D.: A compendium of Chinese meteorological records of the last 3,000 years, Jiangsu Education Publishing House, Nanjing,2004.
	9	autumn	flood		commanderies and kingdoms	九月，詔曰：「朕惟百姓失職不贍，遣使者循行郡國問民所疾苦。吏或營私煩擾，不顧厥咎，朕甚閔之。今年郡國頗被水災，已振貸。鹽，民之食，而賈咸貴，眾庶重困。其減天下鹽賈。」 又曰：「令甲，死者不可生，刑者不可息。此先帝之所重，而吏未稱。今繫者或以掠辜若飢寒瘐死獄中，何用心逆人道也！朕甚痛之。其令郡國歲上繫囚以掠笞若瘐死者所坐名、縣、爵、里，丞相御史課殿最以聞。」	Hanshu, The Annals of Emperor Xuan			Zhang, D.: A compendium of Chinese meteorological records of the last 3,000 years, Jiangsu Education Publishing House, Nanjing,2004.
			famine	Bohai		是歲，勃海太守龔遂，入為水衡都尉。先是，勃海左右郡歲飢，盜賊並起，二千石(官吏)不能擒制。上選能治者(拜遂為太守治之)。	Zizhi Tongjian			Zhang, D.: A compendium of Chinese meteorological records of the last 3,000 years, Jiangsu Education Publishing House, Nanjing,2004.
-65	8	autumn				秋八月，詔曰：「朕不明六藝，鬱于大道，是以陰陽風雨未時。其博舉吏民，厥身修正，通文學，明於先王之術，宣究其意者，各二人，中二千石各一人。」	Hanshu, The Annals of Emperor Xuan			Zhang, D.: A compendium of Chinese meteorological records of the last 3,000 years, Jiangsu Education Publishing House, Nanjing,2004.
-64	5	summer	plague		commanderies and kingdoms	夏五月，詔曰：「獄者萬民之命，所以禁暴止邪，養育群生也。能使生者不怨，死者不恨，則可謂文吏矣。今則不然。用法或持巧心，析律貳端，深淺不平，增辭飾非，以成其罪。奏不如實，上亦亡繇知。此朕之不明，吏之不稱，四方黎民將何仰哉！二千石各察官屬，勿用此人。吏務平法。或擅興繇役，飾廚傳，稱過使客，越職踰法，以取名譽，譬猶踐薄冰以待白日，豈不殆哉！今天下頗被疾疫之災，朕甚愍之。其令郡國被災甚者，毋出今年租賦。」	Hanshu, The Annals of Emperor Xuan			Zhang, D.: A compendium of Chinese meteorological records of the last 3,000 years, Jiangsu Education Publishing House, Nanjing,2004.
-63
-62
-61		autumn	drought			秋，大旱。	Hanshu, Treatise on the Five Elements			Zhang, D.: A compendium of Chinese meteorological records of the last 3,000 years, Jiangsu Education Publishing House, Nanjing,2004.
-60
-59
-58			locust	Henan		河南界又有蝗蟲	Hanshu, Biography of Yan Yannian	There were locusts in Henan (commandery).		Jiao, P., Liu, C., and He, Y.: The General History of Natural Disasters in China-the Volume of Qin and Han , Beijing Book co.INC, Beijing, 2009.
-57
-56
-55
-54
-53
-52
-51			famine			詔北邊振穀食。	Hanshu, The Annals of Emperor Xuan	...An imperial edict [ordered] the northern borders to assist him with grain and food.	Ban G, Dubs H (1938) The history of the fomer Han dynasty. Waverly Press, Baltmore.	Jiao, P., Liu, C., and He, Y.: The General History of Natural Disasters in China-the Volume of Qin and Han , Beijing Book co.INC, Beijing, 2009.
-50
-49
-48			poor harvest, famine			…...是時年歲不登，郡國多困，禹奏言:「…...今民大飢而死，死又不葬，為犬豬所食。人至相食，而廄馬食粟，苦其大肥，氣盛怒至，乃日步作之。王者受命於天，為民父母，固當若此乎！」	Hanshu, Biography of Yu Gong	…at that time, the harvests were poor and commanderies and kingdoms of the empire were in dire straits. Gong Yu submitted a memorial, reporting, "…people are dying from the great famine. After death, they lacked the means to bury their bodies, leaving their corpses to be consumed by pigs and dogs. There are even instances of cannibalism. On the other hand, the horses in the imperial stables are s…		Zhang, D.: A compendium of Chinese meteorological records of the last 3,000 years, Jiangsu Education Publishing House, Nanjing,2004.
	4	summer	earthquake			夏四月，詔曰：「朕承先帝之聖緒，獲奉宗廟，戰戰兢兢。間者地數動而未靜，懼於天地之戒，不知所繇。…...」	Hanshu, The Annals of Emperor Yuan	In the summer, the fourth month, an imperial edict said, "I have received [the opportunity to continue] the sage succession of my deceased [ancestors], the emperors, and have obtained [the opportunity] to uphold [the sacrifices in the imperial] ancestral temples, [in doing which I have been] fearful and circumspect. [But] recently the Earth has shaken several times and has not been quiet. [I] am …	Ban G, Dubs H (1938) The history of the fomer Han dynasty. Waverly Press, Baltmore.	Jiao, P., Liu, C., and He, Y.: The General History of Natural Disasters in China-the Volume of Qin and Han , Beijing Book co.INC, Beijing, 2009.
	5	summer	flood	Bohai	Guandong	五月，渤海水大溢。	Hanshu, Treatise on Astronomy	In the fifth month, Bohai Sea water flooded.
	6	summer	poor harvest, famine	Langya	Guandong	1) 六月，關東大飢，民多餓死，瑯邪郡人相食。 2)又曰：「關東今年穀不登，民多困乏。其令郡國被災害甚者毋出租賦。江海陂湖園池屬少府者以假貧民，勿租賦。…...」	1) Hanshu, Treatise on Astronomy 2) Hanshu, The Annals of Emperor Yuan	1) In the sixth month, severe famines struck the Guandong area (east of Hangu Pass). Many people starved to death, and there were instances of cannibalism in Langya Commandery. 2)It also said, "East of the [Hangu] Pass, the grain has not ripened this year and many of the common people are suffering or indigent. Let it be ordered that those kingdoms and commanderies which have been injured severel…	2) Ban G, Dubs H (1938) The history of the fomer Han dynasty. Waverly Press, Baltmore.	1) Zhang, D.: A compendium of Chinese meteorological records of the last 3,000 years, Jiangsu Education Publishing House, Nanjing,2004.
	6	summer	plague			六月，以民疾疫，令大官損膳，減樂府員，省苑馬，以振困乏。	Hanshu, The Annals of Emperor Yuan	In the sixth month, because the common people were [suffering from] sickness and pestilence, [the Emperor] ordered the Grand Provisioner to diminish the [imperial] food, [ordered the regular number of] persons in the Bureau of Music reduced, and dispensed with the horses of the pastures, in order to assist the suffering and indigent.	Ban G, Dubs H (1938) The history of the fomer Han dynasty. Waverly Press, Baltmore.	Zhang, D.: A compendium of Chinese meteorological records of the last 3,000 years, Jiangsu Education Publishing House, Nanjing,2004.
	9	autumn	flood, famine, plague		Guandong (eleven commanderies and kingdoms)	1)九月，關東郡國十一大水，饑，或人相食，轉旁郡錢穀以相救。 2) 是歲，關東大水，郡國十一飢，疫尤甚。	1) Hanshu, The Annals of Emperor Yuan 2) Hanshu, Biography of Yi Feng	1) In the ninth month, in eleven commanderies and kingdoms east of [Hangu] Pass, there was high water and famine so that there were cases of people eating one another. Cash and grain from neighboring commanderies were transported to succor them. 2) This year, there were severe floods in the Guandong area. Eleven commanderies and kingdoms suffered from famine, and especially from plagues.	1) Ban G, Dubs H (1938) The history of the fomer Han dynasty. Waverly Press, Baltmore.	1) Zhang, D.: A compendium of Chinese meteorological records of the last 3,000 years, Jiangsu Education Publishing House, Nanjing,2004.
-47	2	spring	earthquake, landsilde	Longxi		詔曰：「…...今朕恭承天地，託于公侯之上，明不能燭，德不能綏，災異並臻，連年不息。乃二月戊午，地震于隴西郡，毀落太上皇廟殿壁木飾，壞敗豲道縣城郭官寺及民室屋，壓殺人眾。……」	Hanshu, The Annals of Emperor Yuan	An imperial edict said, "...Now that I have respectfully succeeded to [the care of] Heaven and Earth and have been confided with [a place] above that of the highest nobles, [Our] understanding has not been able to light up [the universe and Our] virtue has not been able to tranquillize [it, so that] visitations and prodigies have arrived simultaneously and have not ceased for successive years. Mo…	Ban G, Dubs H (1938) The history of the fomer Han dynasty. Waverly Press, Baltmore.	Jiao, P., Liu, C., and He, Y.: The General History of Natural Disasters in China-the Volume of Qin and Han , Beijing Book co.INC, Beijing, 2009.
			poor harvest, famine			…...間者歲數不登，元元困乏，不勝饑寒，以陷刑辟，朕甚閔之。郡國被地動災甚者無出租賦。赦天下。……	Hanshu, The Annals of Emperor Yuan	"...Recently for several years, there has been no good harvest, so that the great multitude are suffering and indigent, are unable to endure [the extremes of] famine and cold, and hence have become involved in punishments and chastisements. I pity them very much. [Let] those commanderies and kingdoms which have suffered severe visitations of earthquakes not pay the land or capitation taxes..."	Ban G, Dubs H (1938) The history of the fomer Han dynasty. Waverly Press, Baltmore.
	6	summer	famine, poor harvest		Guandong	1)六月，關東饑，齊地人相食。秋七月，詔曰：「歲比災害，民有菜色，慘怛於心。已詔吏虛倉廩，開府庫振救，賜寒者衣。今秋禾麥頗傷。…...」 2) 二年，齊地飢，穀石三百餘，民多餓死，琅邪郡人相食。	1) Hanshu, The Annals of Emperor Yuan 2) Hanshu, Treatise on Food and Money	1) In the sixth month, there was famine east of [Hangu] Pass and in the region of Qi people ate each other. In the autumn, the seventh month, an imperial edict said, "For successive years there have been visitations and disasters, so that the common people are anaemic. [We] are suffering and saddened in heart and have already [issued] an imperial edict [ordering] the officials to empty the storeh…	1) Ban G, Dubs H (1938) The history of the fomer Han dynasty. Waverly Press, Baltmore.	Zhang, D.: A compendium of Chinese meteorological records of the last 3,000 years, Jiangsu Education Publishing House, Nanjing,2004.
			earthquake			1) 一年中地再動。 2)其春地震，夏，客星見昴、卷舌間。上感悟，下詔賜望之爵關內侯，奉朝請。…...冬，地復震。…...前弘恭奏望之等獄決，三月，地大震。……	1) Hanshu, The Annals of Emperor Yuan 2) Hanshu, Biography of Prince Yuan of Chu – Liu Xiang and Liu Xin	1) ...within one year the Earth has twice shaken… 2) That spring there were earthquakes. In the summer, a wandering star appeared among [the constellations] Mao, Juan, and She. The Emperor was moved and became conscious of [his fault], so he issued an imperial edict granting to [Xiao] Wangzhi the noble rank of Guannei Marquis... {in the winter, there was earthquake again.}...Previously Hong Gong …	1) Ban G, Dubs H (1938) The history of the fomer Han dynasty. Waverly Press, Baltmore. 2) This translation mostly comes from the notes made by Dubs H. Text in {} is translated by Yang Z.	1) Jiao, P., Liu, C., and He, Y.: The General History of Natural Disasters in China-the Volume of Qin and Han , Beijing Book co.INC, Beijing, 2009.
			flood	Beihai	Guandong	北海水溢，流殺人民。	Hanshu, The Annals of Emperor Yuan	...in Beihai [Commandery] streams have overflowed and carried away and killed people.	Ban G, Dubs H (1938) The history of the fomer Han dynasty. Waverly Press, Baltmore.	Zhang, D.: A compendium of Chinese meteorological records of the last 3,000 years, Jiangsu Education Publishing House, Nanjing,2004.
-46		summer	drought			夏，旱……	Hanshu, The Annals of Emperor Yuan	In the summer, there was a drought.	Ban G, Dubs H (1938) The history of the fomer Han dynasty. Waverly Press, Baltmore.
-45
-44	4	summer	famine, plague		Guandong	夏四月，有星孛于參。詔曰：「朕之不逮，序位不明，眾僚久崃，未得其人。元元失望，上感皇天，陰陽為變，咎流萬民，朕甚懼之。乃者關東連遭災害，饑寒疾疫，夭不終命。…...」	Hanshu, The Annals of Emperor Yuan	In the summer, the fourth month, a comet appeared in [the constellation] Shen, and an imperial edict said, "Since I am inadequate [to my position], the ranking [of persons] in their positions is not carefully scrutinized, and many offices have long been unoccupied and have not been filled with the [proper] persons, so that the great multitude has lost its hope [of good rulers. This situation] has…	Ban G, Dubs H (1938) The history of the fomer Han dynasty. Waverly Press, Baltmore.	Jiao, P., Liu, C., and He, Y.: The General History of Natural Disasters in China-the Volume of Qin and Han , Beijing Book co.INC, Beijing, 2009.
		summer	flood, rain	Yinchuan, Runan, Huaiyang, Lujiang		夏及秋，大水。潁川、汝南、淮陽、廬江雨，壞鄉聚民舍，及水流殺人。	Wenxian Tongkao	In the summer and in the autumn, there was high water in Yinchuan, Runan, Huaiyang, and Lujiang [Commanderies]. The rain destroyed the dwellings of the common people in the districts and burgs and the streams carried away and killed the people.	Ban G, Dubs H (1938) The history of the fomer Han dynasty. Waverly Press, Baltmore.	Zhang, D.: A compendium of Chinese meteorological records of the last 3,000 years, Jiangsu Education Publishing House, Nanjing,2004.
-43	3	spring	cold, snow, frost, poor harvest, famine		Guandong	1)是月雨雪，隕霜傷麥稼，秋罷。 2)永光元年，春霜夏寒，日青亡光，上復以詔條責曰：「郎有從東方來者，言民父子相棄。丞相、御史案事之吏匿不言邪？…...方今年歲未可預知也，即有水旱，其憂不細。.....」定國惶恐，上書自劾，歸侯印，乞骸骨。 3)三月，隕霜殺桑。 4)四月，日色青白，亡景，正中時有景亡光。是夏寒，至九月，日乃有光。	1) Hanshu, The Annals of Emperor Yuan 2) Hanshu- Biography of Yu Dingguo 3) Hanshu, Treatise on the Five Elements 4) Hanshu, Treatise on the Five Elements	1) In this month it snowed and there was a fall of frost which injured the wheat harvest.In the autumn, it was abolished. 2) In the first year of the Yongguang Reign Period, frost fell in the spring, and the summer was cold. The sun was pale blue and had no brightness. The Emperor issued a decree again, blaming officials, "An official from the east reported that the people [are suffering from hun…	1) 3) 4) Ban G, Dubs H (1938) The history of the fomer Han dynasty. Waverly Press, Baltmore.	Zhang, D.: A compendium of Chinese meteorological records of the last 3,000 years, Jiangsu Education Publishing House, Nanjing,2004.
	9	autumn	cold, frost, poor harvest, famine		everywhere	九月二日，隕霜殺稼，天下大飢。	Hanshu, Treatise on the Five Elements	On the 2nd day of the ninth month, frost fell, killing the harvest, and there was a great famine in the whole empire.	Ban G, Dubs H (1938) The history of the fomer Han dynasty. Waverly Press, Baltmore. (Changes have been made to this translation based on the original text).	Zhang, D.: A compendium of Chinese meteorological records of the last 3,000 years, Jiangsu Education Publishing House, Nanjing,2004.
-42	6	summer	poor harvest, famine		Guandong	1)夏六月，詔曰：「間者連年不收，四方咸困。元元之民，勞於耕耘，又亡成功，困於饑饉，亡以相救。朕為民父母，德不能覆，而有其刑，甚自傷焉。其赦天下。」 2)是歲時比不登，京師穀石二百餘，邊郡四百，關東五百。四方饑饉，朝廷方以為憂，而遭羌變。	1) Hanshu, The Annals of Emperor Yuan 2) Hanshu, Biography of Feng Fengshi	1) In the summer, the sixth month, an imperial edict said, "Recently for consecutive years, [the harvest] has not been gathered and the four quarters [of the empire] are all suffering. The great multitude of common people work hard at plowing and weeding, but it does not produce any results, so that they suffer from a famine, and there is no means by which they can be saved. I am the parent of th…	1) Ban G, Dubs H (1938) The history of the fomer Han dynasty. Waverly Press, Baltmore. (Changes have been made to this translation based on the original text).	Zhang, D.: A compendium of Chinese meteorological records of the last 3,000 years, Jiangsu Education Publishing House, Nanjing,2004.
			earthquake			是時，有日蝕地震之變，上問以政治得失	Hanshu, Biography of Kuang Heng	At this time, there were meteorological anomalies including a solar eclipse and an earthquake. The emperor made an inquiry [to Kuang Heng] about [the relation between such changes and] the gains and losses in politics.		Jiao, P., Liu, C., and He, Y.: The General History of Natural Disasters in China-the Volume of Qin and Han , Beijing Book co.INC, Beijing, 2009.
-41	11	winter	earthquake, rain			冬十一月，詔曰：「乃者己丑地動，中冬雨水，大霧，盜賊並起。吏何不以時禁？各悉意對。」	Hanshu, The Annals of Emperor Yuan	In the winter, the eleventh month, an imperial edict said, "Recently, in the second [month] of winter [i.e., the eleventh month], on [the day] Jichou, there was an earthquake and a rain of water and a great fog. Robbers and brigands have arisen simultaneously; why do not the officials conform to the prohibitions for the seasons? Let each one express his whole mind in reply."	Ban G, Dubs H (1938) The history of the fomer Han dynasty. Waverly Press, Baltmore.	Zhang, D.: A compendium of Chinese meteorological records of the last 3,000 years, Jiangsu Education Publishing House, Nanjing,2004.
-40
-39		autumn	flood, river overflow	Yinchuan, Runan, Huaiyang, Lujiang		1) 秋，潁川水出，流殺人民。 2)夏及秋，大水。潁川、汝南、淮陽、廬江雨，壞鄉聚民舍，及水流殺人。 3) 元帝永光五年，河決清河靈鳴犢口，而屯氏河絕。 Note: According to studies such as Chen YX (2001) A Study of Natural Disaster and the Societies of Han Dynasties (灾害与两汉社会研究). PhD Central China Normal University, record 3) is a continuous event of 1) and 2), therefore they are listed together.	1) Hanshu, The Annals of Emperor Yuan 2) Hanshu, Treatise on the Five Elements 3) Hanshu, Treatise on Rivers and Canals	1) In the autumn, in Yingchuan [Commandery], the streams overflowed, carrying away and killing people. 2) In the summer and in the autumn, there was high water in Ying-ch'uan, Ju-nan, Huai-yang, and Lu-chiang [Commanderies]. The rain destroyed the dwellings of the common people in the districts and burgs and the streams carried away and killed the people. 3) This year, [the Yellow] River overflow…	1) 2)Ban G, Dubs H (1938) The history of the fomer Han dynasty. Waverly Press, Baltmore.	Zhang, D.: A compendium of Chinese meteorological records of the last 3,000 years, Jiangsu Education Publishing House, Nanjing,2004.
-38
-37			drought			元帝建昭二年大旱	Wenxian Tongkao	Emperor Yuan of Han, in the 2nd year of the Jianzhao reign period, there was a great drought.		Jiao, P., Liu, C., and He, Y.: The General History of Natural Disasters in China-the Volume of Qin and Han , Beijing Book co.INC, Beijing, 2009.
			earthquake, snow	Qi and Chu	Guandong	十一月，齊楚地震，大雨雪，樹折屋壞。 十一月，齊楚地大雪，深五尺。	1) Hanshu, The Annals of Emperor Yuan 2) Hanshu, Treatise on the Five Elements	1) In the winter, the eleventh month, there was an earthquake and a great fall of snow in [the kingdoms of] Qi and Chu. Trees were broken and houses fell in ruin. 2) In the eleventh month, there was a great fall of snow in [the kingdoms of] Qi and Chu. The snow was five chi deep.	1) Ban G, Dubs H (1938) The history of the fomer Han dynasty. Waverly Press, Baltmore.	Zhang, D.: A compendium of Chinese meteorological records of the last 3,000 years, Jiangsu Education Publishing House, Nanjing,2004.
-36
-35	3	spring	snow			三月，雨雪，燕多死。	Hanshu, Treatise on the Five Elements	In the third month, there was snow, and many swallows died.		Zhang, D.: A compendium of Chinese meteorological records of the last 3,000 years, Jiangsu Education Publishing House, Nanjing,2004.
	4	summer	famine			夏四月，詔曰：「朕承先帝之休烈，夙夜栗栗，懼不克任。間者陰陽不調，五行失序，百姓饑饉。…...」	Hanshu, The Annals of Emperor Yuan	In the summer, the fourth month, an imperial edict said, "I have succeeded to the glorious achievements of our imperial predecessors. Morning and night I have been respectfully attentive, fearing lest I may not be capable in my duties. Recently the Yin and Yang have not accorded [with each other], and the five elements have lost their order, so that the people have been famished..."	Ban G, Dubs H (1938) The history of the fomer Han dynasty. Waverly Press, Baltmore.	Zhang, D.: A compendium of Chinese meteorological records of the last 3,000 years, Jiangsu Education Publishing House, Nanjing,2004.
	6	summer	earthquake, river flows backward, landslide	Lantian [county]		(六月)藍田地沙石雍霸水，安陵岸崩雍涇水，水逆流。	Hanshu, The Annals of Emperor Yuan	In Lantian [county], there was an earth[quake and a mountain collapsed], and gravel and stones blocked the Ba River. At the An Tomb, the [river] bank collapsed and blocked the Jing River, so that its water flowed backwards.	Ban G, Dubs H (1938) The history of the fomer Han dynasty. Waverly Press, Baltmore.	Jiao, P., Liu, C., and He, Y.: The General History of Natural Disasters in China-the Volume of Qin and Han , Beijing Book co.INC, Beijing, 2009.
-34
-33
-32	2	spring	wind			二月，右將軍長史姚尹等使匈奴還，去塞百餘里，暴風火發，燒殺尹等七人。	Hanshu, The Annals of Emperor Cheng	In the second month, Yao Yin, a Chief Clerk of the General of the Right, [Wang Shang], who had been sent [as an envoy] to the Huns, and others --when they were on their way back and were a hundred-odd li (measurement unit, 1 li approximately equals to 415.8 meter today) from the Barrier --a fire which sprang up [in the grass] in a violent wind burnt to death [Yao] Yin and the others, seven person…	Ban G, Dubs H (1938) The history of the fomer Han dynasty. Waverly Press, Baltmore.	Zhang, D.: A compendium of Chinese meteorological records of the last 3,000 years, Jiangsu Education Publishing House, Nanjing,2004.
	9	autumn	flood, river overflow			至其九月…...其後則有北宮井溢，南流逆理，數郡水出，流殺人民。	Hanshu, Biography of the Empresses and Imperial Affines	…in the ninth month.. The water from the wells of the North Palace overflowed to the south, which was unusual. Several commanderies suffered from floods, which carried away and killed many people.		Jiao, P., Liu, C., and He, Y.: The General History of Natural Disasters in China-the Volume of Qin and Han , Beijing Book co.INC, Beijing, 2009.
	12	winter	wind		commanderies and kingdoms	十二月，作長安南北郊，罷甘泉、汾陰祠。是日大風，拔甘泉畤中大木十韋以上。郡國被災什四以上，毋收田租。	Hanshu, The Annals of Emperor Cheng	In the twelfth month, [places] for the suburban sacrifices [to Heaven and Earth and their rulers] were made to the south and north of Chang'an, [respectively], and the sacrifices [to these deities] at Ganquan [Palace] and at Fen yin, [respectively], were abolished. On that day a great wind uprooted large trees that were more than ten spans [in circumference] at the place for sacrifice in Kan-ch'ü…	Ban G, Dubs H (1938) The history of the fomer Han dynasty. Waverly Press, Baltmore.	Zhang, D.: A compendium of Chinese meteorological records of the last 3,000 years, Jiangsu Education Publishing House, Nanjing,2004.
-31		summer	drought			夏，大旱。	Hanshu, The Annals of Emperor Cheng	In the summer there was a great drought.	Ban G, Dubs H (1938) The history of the fomer Han dynasty. Waverly Press, Baltmore.	Zhang, D.: A compendium of Chinese meteorological records of the last 3,000 years, Jiangsu Education Publishing House, Nanjing,2004.
-30		summer	flood, rain	capital area	Guanzhong	夏，大水，三輔霖雨三十餘日，郡國十九雨，山谷水出，凡殺四千餘人，壞官寺民舍八萬三千餘所。	Hanshu, Treatise on the Five Elements	In the summer, there was a great flood. The rain lasted for over thirty days in the three capital commanderies, and it lasted for nineteen days in other commanderies and kingdoms. Floods from the mountains caused over 4,000 deaths and destroyed more than 83,000 government offices and homes.		Zhang, D.: A compendium of Chinese meteorological records of the last 3,000 years, Jiangsu Education Publishing House, Nanjing,2004.
		autumn	flood, rain		Guanzhong	1)秋，關內大水。七月，虒上小女陳持弓聞大水至，走入橫城門，闌入尚方掖門，至未央宮鉤盾中。吏民驚上城。九月，詔曰：「乃者郡國被水災，流殺人民，多至千數。京師無故訛言大水至，吏民驚恐，奔走乘城。殆苛暴深刻之吏未息，元元冤失職者眾。遣諫大夫林等循行天下。」 2) 秋，大雨三十餘日。	1) Hanshu, The Annals of Emperor Cheng 2) Hanshu, Treatise on the Five Elements	1) In the autumn, within the [Han-ku] Pass [region] there was a flood. In the seventh month, a little girl of Sishang, Chen Chigong, who heard that the high water was coming, ran and entered the Kuang city-gate, entered without authorization through the side gate of the Master of the Recipes, and reached [the area of] Wei-yang Palace [under the control of] the Intendant of the [Imperial] Palace P…	1) Ban G, Dubs H (1938) The history of the fomer Han dynasty. Waverly Press, Baltmore.	Zhang, D.: A compendium of Chinese meteorological records of the last 3,000 years, Jiangsu Education Publishing House, Nanjing,2004.
	12	winter	earthquake, landslide	capital area	Guanzhong	冬十二月戊申朔，日有蝕之。夜，地震未央宮殿中。詔曰：「蓋聞天生眾民，不能相治，為之立君以統理之。君道得，則草木昆蟲咸得其所；人君不德，謫見天地，災異婁發，以告不治。朕涉道日寡，舉錯不中，乃戊申日蝕地震，朕甚懼焉。公卿其各思朕過失，明白陳之。『女無面從，退有後言。』丞相、御史與將軍、列侯、中二千石及內郡國舉賢良方正能直言極諫之士，詣公車，朕將覽焉。」越嶲山崩。	Hanshu, The Annals of Emperor Cheng			Jiao, P., Liu, C., and He, Y.: The General History of Natural Disasters in China-the Volume of Qin and Han , Beijing Book co.INC, Beijing, 2009.
-29	4	summer	snow			四月，雨雪。	Hanshu, The Annals of Emperor Cheng			Zhang, D.: A compendium of Chinese meteorological records of the last 3,000 years, Jiangsu Education Publishing House, Nanjing,2004.
		autumn	flood, river overflow	Guantao [County] and Dong Commandery; Yanzhou and Yuzhou, Pingyuan, Qiancheng and Jinan [Commanderies]	Guandong	1)秋，桃李實。大水，河決東郡金隄。冬十月，御史大夫尹忠以河決不憂職，自殺。河平元年春三月，詔曰：「河決東郡，流漂二州，校尉王延世隄塞輒平，其改元為河平。賜天下吏民爵，各有差。」 2)河果決於館陶及東郡金隄，泛溢兗、豫，入平原、千乘、濟南，凡灌四郡三十二縣，水居地十五萬餘頃，深者三丈，壞敗官亭室廬且四萬所。御史大夫尹忠對方略疏闊，上切責之，忠自殺。遣大司農非調調均錢穀河決所灌之郡，謁者二人發河南以東漕船五百馏，徙民避水居丘陵，九萬七千餘口。河隄使者王延世使塞，以竹落長四丈，大九圍，盛以小石，兩船夾載而下之。三十六日，河隄成。上曰：「東郡河決，流漂二州，校尉延世隄防三旬立塞。其以五年為河平元年。......」	1) Hanshu, The Annals of Emperor Cheng 2) Hanshu, Treatise on Rivers and Canals			Zhang, D.: A compendium of Chinese meteorological records of the last 3,000 years, Jiangsu Education Publishing House, Nanjing,2004.
-28	3	spring	drought, famine, poor harvest			三月，旱，傷麥，民食榆皮。流民入函谷關。	Hanshu, Treatise on Astronomy			Zhang, D.: A compendium of Chinese meteorological records of the last 3,000 years, Jiangsu Education Publishing House, Nanjing,2004.
-27	4	summer	hail	Chu	Guandong	四月，楚國雨雹，大如斧，蜚鳥死。	Hanshu, Treatise on the Five Elements			Zhang, D.: A compendium of Chinese meteorological records of the last 3,000 years, Jiangsu Education Publishing House, Nanjing,2004.
-26			flood, river overflow	Pingyuan, Jinan, Qiancheng	Guandong	…...河復決平原，流入濟南、千乘，所壞敗者半建始時，復遣王延世治之。	Hanshu, Treatise on Rivers and Canals			Zhang, D.: A compendium of Chinese meteorological records of the last 3,000 years, Jiangsu Education Publishing House, Nanjing,2004.
	2	spring	earthquake, landslide, river flows backward	Jianwei	Shu	1)三年春二月丙戌，犍為地震山崩，雍江水，水逆流。 2)成帝河平三年二月丙戌，犍為柏江山崩，捐江山崩，皆廱江水，江水逆流壞城，殺十三人，地震積二十一日，百二十四動。	1) Hanshu, The Annals of Emperor Cheng 2) Hanshu, Treatise on the Five Elements			Jiao, P., Liu, C., and He, Y.: The General History of Natural Disasters in China-the Volume of Qin and Han , Beijing Book co.INC, Beijing, 2009.
			drought	Yelang		至成帝河平中，夜郎王興與鉤町王禹、漏臥侯俞更舉兵相攻…...時天大旱，立攻絕其水道。	Hanshu, Traditions of the Yi of the southeast, the two Yues, and Joseon (Korea) – Nanyue and Min Yue			Jiao, P., Liu, C., and He, Y.: The General History of Natural Disasters in China-the Volume of Qin and Han , Beijing Book co.INC, Beijing, 2009.
-25	3	spring	flood, river overflow			遣光祿大夫博士嘉等十一人行舉瀕河之郡水所毀傷困乏不能自存者，財振貸。其為水所流壓死，不能自葬，令郡國給槥櫝葬埋。已葬者與錢，人二千。避水它郡國，在所冗食之，謹遇以文理，無令失職。舉惇厚有行能直言之士。(三月)壬申，長陵臨涇岸崩，雍涇水。	Hanshu, The Annals of Emperor Cheng			Jiao, P., Liu, C., and He, Y.: The General History of Natural Disasters in China-the Volume of Qin and Han , Beijing Book co.INC, Beijing, 2009.
-24
-23		spring	cold			二年春，寒。詔曰：「昔在帝堯立羲、和之官，命以四時之事，令不失其序。故《書》云『黎民於蕃時雍』，明以陰陽為本也。今公卿大夫或不信陰陽，薄而小之，所奏請多違時政。傳以不知，周行天下，而欲望陰陽和調，豈不謬哉！其務順四時月令。」	Hanshu, The Annals of Emperor Cheng			Zhang, D.: A compendium of Chinese meteorological records of the last 3,000 years, Jiangsu Education Publishing House, Nanjing,2004.
		autumn	flood			秋，關東大水，流民欲入函谷、天井、壺口、五阮關者，勿苛留。遣諫大夫博士分行視。……	Hanshu, The Annals of Emperor Cheng			Zhang, D.: A compendium of Chinese meteorological records of the last 3,000 years, Jiangsu Education Publishing House, Nanjing,2004.
-22
-21	4	summer	snow			四月，雨雪，燕雀死。	Hanshu, Treatise on the Five Elements			Zhang, D.: A compendium of Chinese meteorological records of the last 3,000 years, Jiangsu Education Publishing House, Nanjing,2004.
-20						鴻嘉元年春二月，詔曰：「朕承天地，獲保宗廟，明有所蔽，德不能綏，刑罰不中，眾冤失職，趨闕告訴者不絕。是以陰陽錯謬，寒暑失序，日月不光，百姓蒙辜，朕甚閔焉。…...」	Hanshu, The Annals of Emperor Cheng			Zhang, D.: A compendium of Chinese meteorological records of the last 3,000 years, Jiangsu Education Publishing House, Nanjing,2004.
-19	3	spring	flood, drought, plague, famine			(三月)詔曰：「…...朕承鴻業十有餘年，數遭水旱疾疫之災，黎民婁困於飢寒，而望禮義之興，豈不難哉！…...」	Hanshu, The Annals of Emperor Cheng			Zhang, D.: A compendium of Chinese meteorological records of the last 3,000 years, Jiangsu Education Publishing House, Nanjing,2004.
-18	4	summer	drought			三年夏四月…...大旱。	Hanshu, The Annals of Emperor Cheng			Zhang, D.: A compendium of Chinese meteorological records of the last 3,000 years, Jiangsu Education Publishing House, Nanjing,2004.
-17	1	spring	drought	Qingzhou, Youzhou, Jizhou	Guandong	四年春正月，詔曰：「…...農民失業，怨恨者眾，傷害和氣，水旱為災，關東流冗者眾，青、幽、冀部尤劇，朕甚痛焉。…...」	Hanshu, The Annals of Emperor Cheng			Zhang, D.: A compendium of Chinese meteorological records of the last 3,000 years, Jiangsu Education Publishing House, Nanjing,2004.
		autumn	flood, river overflow	Bohai, Qinghe	Guandong	1)秋，勃海、清河河溢，被災者振貸之。 2)是歲，勃海、清河、信都河水湓溢，灌縣邑三十一，敗官亭民舍四萬餘所。河隄都尉許商與丞相史孫禁共行視，圖方略。	1) Hanshu, The Annals of Emperor Cheng 2) Hanshu, Treatise on Rivers and Canals			Zhang, D.: A compendium of Chinese meteorological records of the last 3,000 years, Jiangsu Education Publishing House, Nanjing,2004.
-16										2) Zhang, D.: A compendium of Chinese meteorological records of the last 3,000 years, Jiangsu Education Publishing House, Nanjing,2004.
-15			flood, famine	Liang, Pingyuan		永始二年，梁國、平原郡比年傷水災，人相食，刺史守相坐免。	Hanshu, Treatise on Food and Money			Zhang, D.: A compendium of Chinese meteorological records of the last 3,000 years, Jiangsu Education Publishing House, Nanjing,2004.
			poor harvest, famine, plague…		Guandong	1)其後上聞之，以過丞相御史，遂冊免宣曰：「......朕既不明，變異數見，歲比不登，倉廩空虛，百姓飢饉，流離道路，疾疫死者以萬數，人至相食，盜賊並興，群職曠廢，是朕之不德而股肱不良也。乃者廣漢群盜橫恣，殘賊吏民，朕惻然傷之，數以問君，君對輒不如其實。......」 2)「…...百姓財竭力盡，愁恨感天，災異婁降，饑饉仍臻。流散冗食，餧死於道，以百萬數。…...」 3) 二月......又曰：「關東比歲不登，吏民以義收食貧民、入穀物助縣官振贍者，已賜直，其百萬以上，加賜爵右更，欲為吏補三百石，其吏也遷二等。三十萬以上，賜爵五大夫，吏亦遷二等，民補郎。十萬以上，家無出租賦三歲。萬錢以上，一年。」	1) Hanshu, Biography of Xue Xuan 2) Hanshu, Biography of Gu Yong 3) Hanshu, The Annals of Emperor Cheng			1) Jiao, P., Liu, C., and He, Y.: The General History of Natural Disasters in China-the Volume of Qin and Han , Beijing Book co.INC, Beijing, 2009.
-14		summer	drought			夏，大旱。	Hanshu, Treatise on the Five Elements			Zhang, D.: A compendium of Chinese meteorological records of the last 3,000 years, Jiangsu Education Publishing House, Nanjing,2004.
-13		summer	drought			夏，大旱。	Hanshu, Treatise on the Five Elements			Zhang, D.: A compendium of Chinese meteorological records of the last 3,000 years, Jiangsu Education Publishing House, Nanjing,2004.
	6	summer	earthquake	Baling	Guanzhong	六月甲午，霸陵園門闕災。出杜陵諸未嘗御者歸家。詔曰：「乃者，地震京師，火災婁降，朕甚懼之。有司其悉心明對厥咎，朕將親覽焉。」	Hanshu, The Annals of Emperor Cheng			Jiao, P., Liu, C., and He, Y.: The General History of Natural Disasters in China-the Volume of Qin and Han , Beijing Book co.INC, Beijing, 2009.
-12			flood, river overflow, poor harvest			往年郡國二十一傷於水災，禾黍不入。今年蠶麥咸惡。百川沸騰，江河溢決，大水泛濫郡國十五有餘。比年喪稼，時過無宿麥。百姓失業流散，群輩守關。	Hanshu, Biography of Gu Yong			Zhang, D.: A compendium of Chinese meteorological records of the last 3,000 years, Jiangsu Education Publishing House, Nanjing,2004.
-11
-10
-9
-8
-7		autumn	flood, rain, earthquake, plague	Yinchuan, Henan		1)詔曰：「朕承宗廟之重，戰戰兢兢，懼失天心。間者日月亡光，五星失行，郡國比比地動。乃者河南、穎川郡水出，流殺人民，壞敗廬舍。朕之不德，民反蒙辜，朕甚懼焉。已遣光祿大夫循行舉籍，賜死者棺錢，人三千。其令水所傷縣邑及他郡國災害什四以上，民貲不滿十萬，皆無出今年租賦。」 2)九月庚申，地震。上以災異問待詔李尋，對曰：「間者，日尤不精，光明侵奪失色，邪氣珥鯢數作。今汝、潁漂湧，與雨水併為民害，此《詩》所謂百川沸騰。」 3)綏和二年九月丙辰，地震，自京師至北邊郡國三十餘壞城郭，凡殺四百一十五人。 4)「…...惟君登位，於今十年，災害並臻，民被飢餓，加以疾疫溺死，關門牡開，失國守備，盜賊黨輩。......」方進即日自殺。	1) Hanshu, The Annals of Emperor Ai 2) Zizhi Tongjian 3) Hanshu, Treatise on the Five Elements 4) Hanshu,Biography of Zhai Fangjin			1) &2) Zhang, D.: A compendium of Chinese meteorological records of the last 3,000 years, Jiangsu Education Publishing House, Nanjing,2004. 3) & 4) Jiao, P., Liu, C., and He, Y.: The General History of Natural Disasters in China-the Volume of Qin and Han , Beijing Book co.INC, Beijing, 2009.
-6
-5
-4			drought			(平當)遂上書乞骸骨。上報曰：「朕選於眾，以君為相，視事日寡，輔政未久，陰陽不調，冬無大雪，旱氣為災，朕之不德，何必君罪？…...」	Hanshu, Biography of Ping Dang			Zhang, D.: A compendium of Chinese meteorological records of the last 3,000 years, Jiangsu Education Publishing House, Nanjing,2004.
-3		spring	drought			四年春，大旱。關東民傳行西王母籌，經歷郡國，西入關至京師。民又會聚祠西王母，或夜持火上屋，擊鼓號呼相驚恐。	Hanshu, The Annals of Emperor Ai			Jiao, P., Liu, C., and He, Y.: The General History of Natural Disasters in China-the Volume of Qin and Han , Beijing Book co.INC, Beijing, 2009.
			earthquake			是時郡國地震，民訛言行籌	Hanshu, Biography of Bao Xuan			Jiao, P., Liu, C., and He, Y.: The General History of Natural Disasters in China-the Volume of Qin and Han , Beijing Book co.INC, Beijing, 2009.
-2
-1
1
2	4	summer	drought, locust, plague	Qingzhou	Guandong	(夏四月)郡國大旱，蝗，青州尤甚，民流亡。安漢公、四輔、三公、卿大夫、吏民為百困乏獻其田宅者二百三十人，以口賦貧民。遣使者捕蝗，民捕蝗詣吏，以石砀受錢。天下民貲不滿二萬，及被災之郡不滿十萬，勿租稅。民疾疫者，舍空邸第，為置醫藥。	Hanshu, The Annals of Emperor Ping			Zhang, D.: A compendium of Chinese meteorological records of the last 3,000 years, Jiangsu Education Publishing House, Nanjing,2004.
3
4		winter	wind			冬，大風吹長安城東門屋瓦且盡。	Hanshu, The Annals of Emperor Ping			Zhang, D.: A compendium of Chinese meteorological records of the last 3,000 years, Jiangsu Education Publishing House, Nanjing,2004.
5
6
7
8
