# Supplementary material for: Climatic and societal impacts of volcanic eruptions in the Western Han Dynasty (206 BCE–8 CE): a comparative study.
Source: Copernicus journal article supplement (doi:10.5194/cp-21-2061-2025), 2025-11-07
Supplement: Supplementary file 5 [file Table S2 Key policy changes in 180-150 BCE (Western Han Dynasty)-version 2.xlsx]

## Sheet: Table S2
year	Edicts of self-indictment	(The edict, original text)	Amnesties	Agriculture	Tax Reduced/exempted	Ask for advice and talent recommendation (因灾选士)	Economy/ Reduced Expenses	Migration and population change	Official dimissed/ resigned	Other Societal Responses	Foreign and Domestic Affairs (warfare and rebellions included)	Societal and Political Context
-180											In the seventeenth year [of Liu Heng's reign as King of Dai], in the autumn, the Empress of Gaozu died. The [members of] the Lü [clan] plotted to make a rebellion, wishing to endanger the Liu clan, [but] the Lieutenant Chancellor, Chen Ping, the Grand Commandant, Chou Bo, the Marquis of Zhuxu, Liu Zhang, and others together executed them, [then] planned to set up the King of Dai, [Liu Heng, as th…	During the times of [Emperor] Xiaohui and the Empress Lü Zhi , the world had succeeded in putting behind it the sufferings [during the period of] Contending States. Both ruler and subjects sought for effortlessness. Hence although Emperor Hui folded his hands and the Empress of Kao-[tsu], a female lord, assumed the rule and governed without going out of the doors to her apartments, yet the world …
-179			An imperial edict said,"...I have newly ascended the throne. Let there be an amnesty [granted] to the world and let there be granted to the common people one step in [noble] rank and to the women of a hundred households an ox and wine, and [let there be universal] drinking for five days." 下詔曰：「......朕初即位，其赦天下，賜民爵一級，女子百戶牛酒，酺五日。」 Source: Hanshu, The Annals of Emperor Wen Tramslation:Ban G, Dubs H (…	An imperial edict said, "Just now it is spring, when [nature] is harmonious, and the plants and trees and all living beings have means of enjoying themselves, yet [among] my subjects there are widowers, widows, orphans, and childless, distressed and suffering people, and some at the point of death, but no one goes to look after their suffering. What should those who are the fathers and mothers of…								Occasionally the rate (Suan-fu, 算赋) fluctuated. In the reign of Emperor Wen (179-157 BCE), the rate was three times reduced to 40 cash. (It was usually 120 cash when it started in 203 BCE.) Reference: Hsu CY (1980) Han Agriculture: The Formation of Early Chinese Agrarian Economy 206 BC-AD 220. University of Washington Press; Yoshida, T. 1966. Ryokan sozei no kenkyu. 2nd ed. Tokyo: Daian.
-178	In the eleventh month, on [the day] guimao, the last day of the month, there was an eclipse of the sun. The imperial edict said, "...Wherever this order arrives, let all think what are my faults and errors together with the inadequacies of my knowledge and discernment. I beg that you will inform and tell me of it and also present [to Us] those capable and good persons who are foursquare and uprig…	十一月癸卯晦，日有食之。詔曰：「......令至，其悉思朕之過失，及知見之所不及，饨以啟告朕。及舉賢良方正能直言極諫者，以匡朕之不逮。因各敕以職任，務省繇費以便民。朕既不能遠德，故贳然念外人之有非，是以設備未息。今縱不能罷邊屯戍，又飭兵厚衛，其罷衛將軍軍。太僕見馬遺財足，餘皆以給傳置。」 《汉书·文帝纪》	"...Those people who are punished [and made to] work in the county offices, together with those who have borrowed seed and food, and have not paid it back, and those who have not paid in full, [let] them all be pardoned. " 「......民謫作縣官及貸種食未入、入未備者，皆赦之。」 Source: Hanshu, The Annals of Emperor Wen Tramslation:Ban G, Dubs H (1938) The history of the fomer Han dynasty. Waverly Press, Baltmore. Note: Th…	1) In the spring, the first month, on [the day] Dinghai, an imperial edict said, "Now agriculture is the foundation of the world. Let the sacred field be opened. I lead in plowing in order to provide millet and grain offerings for the [imperial] ancestral temple..." 春正月丁亥，詔曰：「夫農，天下之本也，其開藉田，朕親率耕，以給宗廟粢盛。......」 Source: Hanshu, The Annals of Emperor Wen Tramslation:Ban G, Dubs H (1938) The history o…	An imperial edict said, "... Let there be granted to the people of the empire this year half of the land tax on the cultivated fields." 詔曰：「......其賜天下民今年田租之半。」 Source: Hanshu, The Annals of Emperor Wen Tramslation reference:Ban G, Dubs H (1938) The history of the fomer Han dynasty. Waverly Press, Baltmore. Note: "The Han land tax presumably was levied according to a ratio of the produce. When the…	"...I beg that you will inform and tell me of it and also present [to Us] those capable and good persons who are foursquare and upright and are able to speak frankly and unflinchingly admonish [Us], so as to correct my inadequacies." ......及舉賢良方正能直言極諫者，以匡朕之不逮...... Source: Hanshu, The Annals of Emperor Wen Tramslation reference:Ban G, Dubs H (1938) The history of the fomer Han dynasty. Waverly Pr…	"...Let the army of the General of the Guard be abolished. Of the horses which the Chief of the Stud has now, [let] there remain just enough; [let] all the remainder be given for the posts and post-horses…" 其罷衛將軍軍。太僕見馬遺財足，餘皆以給傳置。 Source: Hanshu, The Annals of Emperor Wen Tramslation reference:Ban G, Dubs H (1938) The history of the fomer Han dynasty. Waverly Press, Baltmore. Note: This is for the…	[Chao Cuo memorialized] , “Your Majesty has been concerned with the border problem. Officers are dispatched and soldiers are mobilized at stations along the border line.... It is better to select permanent ' settlers who would reside and cultivate there to defend the border. Let there be high walls and deep moats, equipped with catapults and caltrops. Furthermore, let there be fortified cities wi…			Liu Xiang believed that Nanyue rebelled this year, so he attacked the border of Huainan. Liu Chang, the King of Huainan, defeated them. 劉向以為是歲南越反，攻淮南邊，淮南王長破之。 Source: Hanshu, Treatise on the Five Elements	(Chao Cuo memorialized)"...The way to make grain more valuable is to allow the people to use grain for gaining rewards and redemption from punishment. If now the people of the empire are called on to offer grain to the emperor and are permitted to obtain rank and to redeem their crimes, then the rich people will have rank, the peasants will have money, and the grain will be dispensed. “Those who …
-177			In the autumn, the seventh month, the Emperor [went] from Taiyuan to Chang'an. His edict read, "The King of Jibei [Liu Xingju] has been ungrateful for [Our] goodness, rebelled against his sovereign, deceived and led into error his officials and people, and committed treason. Those among the officials and people of Jibei who stopped [rebelling] of their own accord before the troops arrived and tho…						In the eleventh month, on [the day] Dingmao, the last day of the month, there was an eclipse of the sun. The imperial edict said, "Sometime ago an imperial edict ordered the marquises to go to their states. [But they asked] to be excused and have not gone. The Lieutenant Chancellor is [the person] whom I honor [most]. Let him lead the marquises to their states for Us." Thereupon the Lieutenant Ch…		1) In the fifth month, the Xiongnu entered and occupied the Beidi [Commandery], south of the [Yellow] River, whence they marauded. The Emperor favored the Ganquan[Palace by visiting it. The Emperor] sent the Lieutenant Chancellor Kuan Ying to attack the Huns, and the Huns left. 五月，匈奴入居北地、河南為寇。上幸甘泉，遣丞相灌嬰擊匈奴，匈奴去。 Source: Hanshu, the Annals of Emperor Wen Tramslation:Ban G, Dubs H (1938) The history…
-176											“A peaceful accommodation (between Han and Xiongnu), including the exchange of gifts, letters, and courtesies, was arranged between 176 and 174 BCE. ” Reference: The Cambridge History of China, Volume 1: The Ch'in and Han Empires, 221 BC-AD 220
-175
-174											1) In the eleventh month, the King of Huainan, [Liu] Chang, plotted a rebellion, was dismissed, exiled to Yandao in the Shu [Commandery], and died [on the way ] at Yong. 十一月，淮南王長謀反，廢遷蜀嚴道，死雍。 Source: Hanshu, the Annals of Emperor Wen Tramslation:Ban G, Dubs H (1938) The history of the fomer Han dynasty. Waverly Press, Baltmore. 2) In the sixth year, Marquis He rebelled, and he was defeated. 六年，侯賀謀…
-173			In the seventh year... In the summer, the fourth month, an amnesty was granted to the world. 七年……夏四月，赦天下。 Source: Hanshu, The Annals of Emperor Wen Tramslation:Ban G, Dubs H (1938) The history of the fomer Han dynasty. Waverly Press, Baltmore.
-172
-171
-170
-169
-168				1) An edict [by Emperor Wen] also said: “...Diligent farming is the foundation of livelihood. The thrice venerable are master instructors for the people. Incorrupt officials are models for the people. I indeed appreciate very much the conduct of those gentlemen. Now it is said that there is no such person in a county of ten thousand to meet the standard of recommendation. Does this reflect the re…	An edict was issued [by Emperor Wen] stating: “The way to lead the people is to stress the fundamental [occupation]. I myself have led the empire in farming for ten years down to the present. The land under cultivation has, however, not been extended; if for a single year the harvest fails, the people will bear the marks of hunger. This is because the people who are engaged therein are still few,…					Thirty-nine years after the founding of the Han,in the reign of Emperor Wen, the Yellow River overflowed its banks at Suanzao and destroyed the Metal Embankment east of there. Accordingly a large force of labourers was called up in Dong Commandery to repair the break... 漢興三十九年，孝文時河決酸棗，東潰金堤，於是東郡大興卒塞之。 Source: Shiji, vol 29 The Treatise on the Yellow River and Canals Translation: Sima Q, Watson B(1…
-167				In the thirteenth year, in the spring, the second month, on [the day] Jiayin, an imperial edict said, "I myself lead the world in farming and plowing in order to offer millet and sacrificial grain [in sacrifice]. The Empress herself raises silk-worms in order to provide sacrificial clothing. Let ceremonies and rites be established [for these procedures]." 十三年春二月甲寅，詔曰：「朕親率天下農耕以供粢盛，皇后親桑以奉祭服，其具禮儀。」 …	In the sixth month, an imperial edict said, "Agriculture is the foundation of the world. No duty is greater. Now if [anyone] personally follows this pursuit diligently, he has yet [to pay] the impositions of the land tax and tax on produce. This is making no distinction between [the treatment of what is] fundamental and [what is] least important. This is not appropriate to [Our] way of encouragin…				In the summer of the thirteenth year the emperor announced: I have heard that disaster arises naturally in response to the hatreds of the ruler, while good fortune is brought about by his virtue; it is thus that the way of Heaven operates. Therefore all the faults of my officials must have their origin in me. Now the post of private invocator is intended to transfer the ruler’s errors to his subo…
-166					No Land Tax in the 12 years from 167 BCE to 156 BCE.						1) In the fourteenth year, in the winter, the Xiongnu pillaged at the frontier and killed the Chief Commandant of the Beidi [Commandery]...hereupon [the Emperor] made the Marquis of Dongyang, Zhang Xiangru, the General-in-chief. The Marquis of Jiancheng, Dong He, the Prefect of the Capital, and Luan Pu were both made generals to attack the Xiongnu. The Xiongnu fled. (十四年冬，匈奴寇邊，殺北地都尉卬。......於是以東陽侯…
-165			In the summer, the fourth month, the Emperor favored Yong [by a visit] and for the first time was presented to the Five Lords [on High] by means of a suburban sacrifice. An amnesty [was granted] to the world. [The Emperor] renewed the sacrifices to the famous mountains and the great rivers, which had been worshipped and whose [sacrifices] had been stopped. The officers charged therewith [were ord…		No Land Tax in the 12 years from 167 BCE to 156 BCE.			Chao Cuo again memorialized, “Your subject learned that in antiquity when people were moved to remote regions to fill up the extensive and unoccupied land, [the government] determined the harmony of yin and yang, tasted the flavor of the rivers and springs, examined the quality of the soil, and observed the natural resources of the plants and trees. Afterwards, it built a town and erected a city …				A new emphasis was placed on the observance of the state cults at this time. Emperor Wen was the first of the Han emperors to pay a personal visit to worship at the shrines of the Five Powers at Yong (雍), in 165 BCE.; in the following year he attended services held at the newly erected shrines at Weiyang (渭陽). Reference: The Cambridge History of China, Volume 1: The Ch'in and Han Empires, 221 BC-…
-164					No Land Tax in the 12 years from 167 BCE to 156 BCE.						In the latter [part of Emperor Wen's reign], the first year, in the winter, the tenth month, the deceits of Xin Yuanping were discovered; he plotted rebellion, and was exterminated with his three [sets of] relatives. 後元年冬十月，新垣平詐覺，謀反，夷三族。 Source: Hanshu, the Annals of Emperor Wen Tramslation:Ban G, Dubs H (1938) The history of the fomer Han dynasty. Waverly Press, Baltmore.
-163	An imperial edict said, "Recently for many years there have continually been no good harvests. Moreover there have been visitations of floods, droughts, sickness, and epidemics. I have been very much worried because of them. We are ignorant and not perspicacious and do not yet understand just what is to blame. We have been thinking: is there some fault in my [way of] government or is there some d…	詔曰：「間者數年比不登，又有水旱疾疫之災，朕甚憂之。愚而不明，未達其咎。意者朕之政有所失而行有過與？乃天道有不順，地利或不得，人事多失和，鬼神廢不享與？何以致此？將百官之奉養或費，無用之事或多與？何其民食之寡乏也！夫度田非益寡，而計民未加益，以口量地，其於古猶有餘，而食之甚不足者，其咎安在？無乃百姓之從事於末以害農者蕃，為酒醪以靡穀者多，六畜之食焉者眾與？細大之義，吾未能得其中。其與丞相列侯吏二千石博士議之，有可以佐百姓者，率意遠思，無有所隱。」 《漢書·文帝紀》			No Land Tax in the 12 years from 167 BCE to 156 BCE.	"...Let [this matter] be discussed with the Lieutenant Chancellor, the marquises, the officials [of ranks worth] two thousand piculs, and the Erudits. Should there be anything that might be of assistance to Our subjects, let them apply themselves with all their minds and think deeply [about the matter]. Let them not hide anything [from Us]." 其與丞相列侯吏二千石博士議之，有可以佐百姓者，率意遠思，無有所隱。 Source: Hanshu, The A…
-162					No Land Tax in the 12 years from 167 BCE to 156 BCE.						The Xiongnu had been frequently attacking the border of the Han, capturing and killing many people. Now they asked for peace and friendship. Thus, a renewal of friendly relations (between Han and Xiongnu) was made this year. Source: Hanshu, The Annals of Emperor Wen Note: This is a summary of all records regarding the event in Hanshu
-161					No Land Tax in the 12 years from 167 BCE to 156 BCE.
-160			In the fourth year, in the summer, the fourth month, on [the day] Bingyin, the last day of the month, there was an eclipse of the sun. In the fifth month, an amnesty was granted to the world. 四年夏四月丙寅晦，日有蝕之。五月，赦天下。 Source: Hanshu, The Annals of Emperor Wen Tramslation:Ban G, Dubs H (1938) The history of the fomer Han dynasty. Waverly Press, Baltmore. Note: The solar eclipse may not be relevant to …		No Land Tax in the 12 years from 167 BCE to 156 BCE.						A system of beacons and lookout stations was establisedh by the Han government, and no major incursions seem to have followed for a time. Reference: The Cambridge History of China, Volume 1: The Ch'in and Han Empires, 221 BC-AD 220
-159					No Land Tax in the 12 years from 167 BCE to 156 BCE.						(In the fifth year of the latter part of Emperor Wen's reign,) Zhou Cheng, Marquis Gaojing, revolted; he was imprisoned and died. （高景侯周成）孝文后五年，谋反 ，下狱死。 Source: Hanshu, Table of sons of nobles, vol.15
-158					1) No Land Tax in the 12 years from 167 BCE to 156 BCE. 2) [The Emperor] ordered that the nobles should not pay tribute （because of the drought and locusts in the fourth month).		In the summer, the fourth month, there was a great drouth and locusts. [The Emperor] ordered that the nobles should not pay tribute. He opened [to the common people] the mountains and marshes, reduced the [imperial] robes and the imperial officers, diminished the [regular] number of Gentlemen and officials, and opened the granaries in order to succor the people. The people were allowed to sell [a…			In the summer, the fourth month, there was a great drouth and locusts. [The Emperor] ordered that the nobles should not pay tribute. He opened [to the common people] the mountains and marshes, reduced the [imperial] robes and the imperial officers, diminished the [regular] number of Gentlemen and officials, and opened the granaries in order to succor the people. The people were allowed to sell [a…	In the sixth year, in the winter, thirty thousand Xiongnu horsemen entered the Shang Commandery and thirty thousand [Xiongnu] horsemen entered the Yunzhong [Commandery]. 六年冬，匈奴三萬騎入上郡，三萬騎入雲中。 Source: Hanshu, The Annals of Emperor Wen Tramslation:Ban G, Dubs H (1938) The history of the fomer Han dynasty. Waverly Press, Baltmore.
-157					No Land Tax in the 12 years from 167 BCE to 156 BCE.							Emperor Wen died in the sixth month of this year.
-156			In the summer, the fourth month, an amnesty was granted to the empire and the common people were given one step in noble rank. 夏四月，赦天下。賜民爵一級。 Source: Hanshu, The Annals of Emperor Jing Tramslation:Ban G, Dubs H (1938) The history of the fomer Han dynasty. Waverly Press, Baltmore.		1)Emperor Jing decreed in 156 BCE to levy a permanent rate of one-thirtieth on land. Reference: Hsu CY (1980) Han Agriculture: The Formation of Early Chinese Agrarian Economy 206 BC-AD 220. University of Washington Press 2) In the fifth month [the Emperor] ordered that the cultivated fields should pay half of their [former] tax. 五月，令田半租。 Source: Hanshu, The Annals of Emperor Jing Tramslation:Ban …			In the spring, the first month, an imperial edict said, "Recently, for successive years there have not been good harvests, so that many people are lacking food; early death is cutting short their natural [span of] years. I am very much pained at this [circumstance]. In some of the commanderies and kingdoms there are stony and narrow [regions] and there is no place for agriculture or sericulture o…
-155										...When sometime afterwards, in the commandery of Shang and to the westward, there was a drought, the ordinance for sale of rank was again revised, its cost, however, being cut in order to attract the people.people; while exiles condemned to guard duty on the frontiers for one year, together with the women of their families sentenced to menial service in government buildings for the year, were al…	1) In the second year of Emperor Jing's reign, Marquis Jixin, Chen Yang revolted and was executed. 孝景二年，(紀信侯陳煬) 反 ，誅。 Source: Hanshu, Table of meritorious officials during the reigns of (Emperors) Gao, Hui, Wen and Empress Gao, vol. 16 2) In the second year of Emperor Jing's reign, Shen Ping, the son of Shen Yiji, revolted and commited suicide. 孝景二年，（審食其之子審平）坐謀反，自殺。 Source: Hanshu, Table of Sons …
-154			1) In the spring, the first month, ... the King of Wu, [Liu] Bi, the King of Jiaoxi [Liu] Ang, the King of Chu, [Liu] Wu, the King of Zhao, [Liu] Sui, the King of Jinan, [Liu] Piguang, the King of Zichuan, [Liu] Xian, and the King of Jiaodong, [Liu] Xiongqu, all mobilized their troops and rebelled. [The Emperor] granted a general amnesty to the empire and sent the Grand Commandant, [Zhou] Yafu, a…								The rebellion of the seven kingdoms. For details see "Amnesties" of this year.
-153			In the summer, the fourth month, on [the day] Jisi, [the Emperor] established his Imperial Sons, [Liu] Rong as Imperial heir-apparent, and [Liu] Che as King of Jiaodong, and in the sixth month an amnesty was granted to the world and the common people were granted a step in noble rank. 夏四月己巳，立皇子榮為皇太子，徹為膠東王。六月，赦天下，賜民爵一級。 Source: Hanshu, The Annals of Emperor Jing Tramslation:Ban G, Dubs H (1938) Th…								In the third year, in the winter, the twelfth month, an imperial edict said, "Ji Huiyue, son of the Marquis of Xiangping, Ji Jia, has been unfilial and has conspired to revolt, intending thereby to kill [his father] Jia, which is treason and inhumanity. 三年冬十二月，詔曰：「襄平侯嘉子恢說不孝，謀反，欲以殺嘉，大逆無道......」 Source: Hanshu, The Annals of Emperor Jing Tramslation:Ban G, Dubs H (1938) The history of the fomer Han…
-152
-151
-150
