# Supplementary material for: Climatic and societal impacts of volcanic eruptions in the Western Han Dynasty (206 BCE–8 CE): a comparative study.
Source: Copernicus journal article supplement (doi:10.5194/cp-21-2061-2025), 2025-11-07
Supplement: Supplementary file 7 [file Table S3 Key policy changes in 60-30 BCE (Western Han Dynasty)-version 2.xlsx]

## Sheet: Table S3
year	Edicts of self-indictment	(The edict, original text)	Amnesties	Agriculture	Tax Reduced/ exempted	Ask for advice and talent recommendation (因灾选士)	Economy/ Reduced Expenses	Migration and population change	Food Transportation	Official dismissed/ resigned	Officers inspect and travel about the empire	Other disaster relief strategies	Foreign and Domestic Affairs (warfare and rebellions included)	Societal and Political Context
-60			In the second year, in the spring, the second month, an imperial edict said, "Recently, in the first month, on [the day] yichou, phoenixes perched and sweet dew descended in the imperial capital, and flocks of birds by the ten-thousands in number followed [the phoenixes]. I am not [perfectly] virtuous, [yet] have repeatedly obtained the blessing of Heaven. [I have merely] been careful in doing my…										Zhao Chongguo garrisoned the border to defend against the Xiongnu in the war. Reference: History Editing Committee of China's Military (1985) Tabulation of Wars in Ancient China Vol. 1&2. Beijing: Liberation Army Press	[Zhao Chongguo] then submitted a memorial on the establishment of military colonies,“ (As long as the war canot be ended, conscription and corvée labor will not be ceased)... I would withdraw the cavalry units, yet retain the conscripts, the mercenaries, as well as the infantry from Huaiyang and Runan, and the private retainers of the officers,... Let them be stationed at the strategic locations.…
-59													Emperor Xuan of Han, in the third year of the Shenjue reign period, there were rebellions in three counties in Zhuya Commandery. 至宣帝神爵三年，珠崖三縣復反。 Source: Hanshu, Biography of Yan, Zhu, Wuqiu, Zhufu, Xu, Yan, Zhong, Wang and Jia.
-58			In the fourth year, in the spring, the second month, an imperial edict said, "Recently male and female phoenixes have perched and sweet dew has descended in the capital, so that auspicious presages have appeared simultaneously. ...Let an amnesty be granted to the empire, [let] the common people be granted one step in noble rank, [let] the women of a hundred households [be granted] an ox and wine,…	the [Diligent] Cultivators of the Fields (of Yingchuan Commandery), one step (in noble rank) (潁川)力田一級 Source: Hanshu, The Annals of Emperor Xuan Tramslation:Ban G, Dubs H (1938) The history of the fomer Han dynasty. Waverly Press, Baltmore.									The Xiongnu Chanyu Huhanxie (呼韓邪單于) launched an attack on the Woyanqudi Chanyu (握衍朐鞮單于), in the Battle of Guqieshui (姑且水). Reference: History Editing Committee of China's Military (1985) Tabulation of Wars in Ancient China Vol. 1&2. Beijing: Liberation Army Press	1) ...Let five-tenths [of their present salary be added to the salary of] officials [ranking at] one hundred piculs and [those of] lesser [ranks]… 「......其益吏百石以下奉十五。」 Source: Hanshu, The Annals of Emperor Xuan Tramslation:Ban G, Dubs H (1938) The history of the fomer Han dynasty. Waverly Press, Baltmore. Note: Increased officials' income. 2) ...[The Emperor] ordered that each of the inner command…
-57			In the summer, an amnesty [was granted] to the convicts who had built the Du Tomb. 夏，赦徒作杜陵者。 Source: Hanshu, The Annals of Emperor Xuan Tramslation:Ban G, Dubs H (1938) The history of the fomer Han dynasty. Waverly Press, Baltmore.										The war of the five Chanyu of Xiongnu Reference: History Editing Committee of China's Military (1985) Tabulation of Wars in Ancient China Vol. 1&2. Beijing: Liberation Army Press
-56
-55			In the third month, [the Emperor] traveled and favored Hedong [Commandery by a visit, where he] sacrificed to Sovereign Earth....Let the high ministers and the grandees exert themselves [to do their best. Let] the poll-money in the [whole] empire be reduced and [let] an amnesty [be granted to those who have committed crimes] [deserving] capital punishment or lesser [crimes. Let] the common people…		... Let] the poll-money in the [whole] empire be reduced… 減天下口錢。 Source: Hanshu, The Annals of Emperor Xuan Tramslation:Ban G, Dubs H (1938) The history of the fomer Han dynasty. Waverly Press, Baltmore. Note: This is part of the amnesty of this year.
-54	In the summer, the fourth month, on [the day] xinchou, the first day of the month, there was an eclipse of the sun. The imperial edict said, "August Heaven makes a prodigy appear in order to warn me. This [event has happened because] I am inadequate and the officials are not suitable [to their positions]. Previously, [I] sent messengers to ask the common people what they suffered from or were tro…	夏四月辛丑晦，日有蝕之。詔曰：「皇天見異，以戒朕躬，是朕之不逮，吏之不稱也。以前使使者問民所疾苦，復遣丞相、御史掾二十四人循行天下，舉冤獄，察擅為苛禁深刻不改者。」 《漢書·宣帝紀》		The Palace Assistant Grand Minister of Agriculture, Geng Shouchang, memorialized that the "Ever-Normal Granary" should be established, in order to provision the northern borders and reduce [the amount] of transport [for grain]. He was granted the noble rank of Guannei Marquis. 大司農中丞耿壽昌奏設常平倉，以給北邊，省轉漕。賜爵關內侯。 Source: Hanshu, The Annals of Emperor Xuan Tramslation:Ban G, Dubs H (1938) The history of …			...the “Ever-Normal Granary”(常平倉) proposed by Geng Shouchang (耿壽昌) in 54 BCE with the purpose of leveraging grain price while benefiting both the public and the government… Note: This is summarized from several volumns of Hanshu.				...Previously, [We] sent messengers to ask the common people what they suffered from or were troubled by; again [We] sent twenty-four Division Heads [from the offices of] the Lieutenant Chancellor and [Grandee] Secretary to inspect and travel about the empire... 以前使使者問民所疾苦，復遣丞相、御史掾二十四人循行天下...... Source: Hanshu, The Annals of Emperor Xuan Tramslation:Ban G, Dubs H (1938) The history of the fomer H…	... to recommend concerning injustices in trials at law and to search for those who arbitrarily make tyrannous prohibitions, are extremely exacting, and have not reformed themselves... 舉冤獄，察擅為苛禁深刻不改者。 Source: Hanshu, The Annals of Emperor Xuan Tramslation:Ban G, Dubs H (1938) The history of the fomer Han dynasty. Waverly Press, Baltmore. Note: This is from the edict addressing the solar eclispse.…		"The ever-normal granary, designed to control the price of grain, was established in 54 BCE. in the frontier commanderies and later developed as a regular institution. The idea was for the government to buy grain when the market was low and to sell when it was high, keeping the price stable as. well as maintaining a steady supply of grain. The results, however, seem to have been rather ineffectiv…
-53													1) Wusun (烏孫) besieged the Han envoies Reference: History Editing Committee of China's Military (1985) Tabulation of Wars in Ancient China Vol. 1&2. Beijing: Liberation Army Press 2) Seven years after the last rebellion, in the first year of the Ganlu reign period, there were rebellions in nine counties (of Zhuya Commandery), and armies were sent to defeat them. 反後七年，甘露元年，九縣反，輒發兵擊定之。 Source:Hansh…
-52			In the second year, in the spring, the first month, [the Emperor] established his Imperial Son [Liu] Xiao as the King of Dingtao.An imperial edict said, "Recently male and female phoenixes have perched and sweet dew has descended, a yellow dragon has ascended and risen...Let an amnesty [be granted] to the empire and let the poll-tax (suan) of the common people be reduced by thirty [cash. Let] gol…		... let the poll-tax (suan) of the common people be reduced by thirty [cash… 減民算三十 Source: Hanshu, The Annals of Emperor Xuan Tramslation:Ban G, Dubs H (1938) The history of the fomer Han dynasty. Waverly Press, Baltmore. Note: This is from the amnesty of this year. Full amnesty see the relevant column of this year.			According to Hsh (1980), "In the Western Han period, the imperial annals registered only nine cases (119, 83, 71, 70, 67, 52, 25, 23, and 17 BCE)" of migration…However, this record cannot be found in Hanshu, the Annals.					In the summer, the fourth month, [the Emperor] sent the Chief Commandant of the Protecting Army, [Chang] Lu, with troops, to attack [the rebels in] Zhuya [Commandery]. 夏四月，遣護軍都尉祿將兵擊珠崖。 Source: Hanshu, The Annals of Emperor Xuan Tramslation:Ban G, Dubs H (1938) The history of the fomer Han dynasty. Waverly Press, Baltmore.
-51				An imperial edict said, "Recently, male and female phoenixes perched at Xincai (County), ... Let there be granted to the Grand Administrator of Runan [Commandery] a hundred bolts of silk and in Xincai [let grants of silk be made] to the Chief Officials, the Thrice Venerable, the Filially Pious, the Fraternally Respectful, and the [Diligent] Cultivators of the Fields, and to widowers, widows, orph…	"... [Let] two steps in noble rank be granted to the common people and let them not pay this year's tax on the fields." " ......毋出今年租。" Source: Hanshu, The Annals of Emperor Xuan Tramslation:Ban G, Dubs H (1938) The history of the fomer Han dynasty. Waverly Press, Baltmore. Note: This is from the same edict in the "agriculture" column of this year.								"...The proposed visit of one of the rival Chanyu named Huhanye to the Chinese court in 51 BCE. was welcomed as a sign of peaceful relations with the Xiongnu, but different opinions prevailed regarding the treatment which should be accorded to the visitor...Eventually it was decided to treat him generously and honorably as part of a policy of winning the friendship of foreigners by a display of b…	In the second month, the Chanyu was dismissed and went back home. [The Emperor] sent the Commandant of the Changle [Palace] Guard, the Marquis of Gaochang, Dong Zhong; the Chief Commandant of Chariots and Cavalry, [Han] Chang; and the Chief Commandant of Cavalry, Hu; leading sixteen thousand cavalry, to escort the Chanyu [out of the Han territory]. The Chanyu [thereafter] dwelt south of the deser…
-50
-49													The battle of the Xiongnu Chanyu Zhizhi (郅支單於) annexing three States. Reference: History Editing Committee of China's Military (1985) Tabulation of Wars in Ancient China Vol. 1&2. Beijing: Liberation Army Press
-48	1) In the summer, the fourth month, an imperial edict said, "I have received [the opportunity to continue] the sage succession of [my] deceased [ancestors], the emperors, and have obtained [the opportunity] to uphold [the sacrifices in the imperial] ancestral temples, [in doing which I have been] fearful and circumspect. [But] recently the Earth has shaken several times and has not been quiet. [W…	1)夏四月，詔曰：「朕承先帝之聖緒，獲奉宗廟，戰戰兢兢。間者地數動而未靜，懼於天地之戒，不知所繇。方田作時，朕憂蒸庶之失業，臨遣光祿大夫褒等十二人循行天下，存問耆老鰥寡孤獨困乏失職之民，延登賢俊，招顯側陋，因覽風俗之化......」又曰：「關東今年穀不登，民多困乏。其令郡國被災害甚者毋出租賦。江海陂湖園池屬少府者以假貧民，勿租賦。賜宗室有屬籍者馬一匹至二駟，三老、孝者帛五匹，弟者、力田三匹，鰥寡孤獨二匹，吏民五十戶牛酒。」 《漢書·元帝紀》 2)九月，關東郡國十一大水，饑，或人相食，轉旁郡錢穀以相救。詔曰：「間者陰陽不調，黎民饑寒，無以保治，惟德淺薄，不足以充入舊貫之居。其令諸宮館希御幸者勿繕治，太僕減穀食馬，水衡省肉食獸。」 《漢書·元帝紀》	In [the year-period] Chuyuan, the first year, in the spring, the first month, on [the day] Xinchou, Emperor Xuan was buried in the Du Tomb, and there were granted: to the vassal kings, the princesses, and the full marquises, actual gold; and to officials [ranking at] two thousand piculs and under, cash and silk; to each proportionately. A general amnesty [was granted] to the empire. 初元元年春正月辛丑，孝宣皇…	1) (In the thrid month, following the amnesty)...The public [plowed] fields, together with the parks which could be dispensed with in [the districts of] the Three Adjuncts and the Grand Master of Ceremonies and in the commanderies and kingdoms, were used to assist the poor people in their occupations; to those whose property did not amount to fully one thousand cash there were given loans of seed…	...It also said, "East of the [Hangu] Pass, the grain has not ripened this year and many of the common people are suffering or indigent. Let it be ordered that those kingdoms and commanderies which have been injured severely by this calamity shall not pay the land or capitation taxes, and that [the revenues of] the rivers, the Ocean, the reservoirs, the lakes, the gardens, and the ponds which are…	...to invite and present [to the throne] capable and distinguished [persons], to summon and make appear [worthy persons in] poor or mean [conditions], and to use the opportunity to observe the development of [the people's] customs…. 「......延登賢俊，招顯側陋，因覽風俗之化......」 Source: Hanshu, The Annals of Emperor Yuan Tramslation:Ban G, Dubs H (1938) The history of the fomer Han dynasty. Waverly Press, Baltmo…	1) In the sixth month, because the common people were [suffering from] sickness and pestilence, [the Emperor] ordered the Grand Provisioner to diminish the [imperial] food, [ordered the regular number of] persons in the Bureau of Music reduced, and dispensed with the horses of the pastures, in order to assist the suffering and indigent. 六月，以民疾疫，令大官損膳，減樂府員，省苑馬，以振困乏。 Source: Hanshu, The Annals of E…	In the autumn, the eighth month, more than ten thousand surrendered northwestern barbarians (Hu), [who had been under the supervision of the Chief Commandant] of Dependent States in Shang Commandery, escaped and entered Xiongnu [territory]. 秋八月，上郡屬國降胡萬餘人亡入匈奴。 Source: Hanshu, The Annals of Emperor Yuan Tramslation:Ban G, Dubs H (1938) The history of the fomer Han dynasty. Waverly Press, Baltmore.	1)When Emperor Yuan just ascended the throne, Hu Hanxie, the Chanyu (chieftain) of the Xiongnu, sent a letter to the emperor, saying that the Xiongnu people were poor and distressed. The Han dynasty issued an edict ordering Yunzhong and Wuyuan [commanderies] to transport 20,000 hu (measurement unit, about 20,000 ml today) of grain to supply the Xiongnu. 元帝初即位，呼韓邪單于復上書，言民眾困乏。漢詔雲中、五原郡轉穀二萬斛以給焉。 Sour…		"...[Hence We] in person send the Imperial Household Grandee Bao and others, twelve persons [in all], to travel about and inspect the empire, to visit and inquire about the common people who are aged, widowers, widows, orphans, childless, in suffering, indigent, or unemployed, to invite and present [to the throne] capable and distinguished [persons]..." ......臨遣光祿大夫褒等十二人循行天下，存問耆老鰥寡孤獨困乏失職之民..... S…	Because of the severe floods, Minister Yi Feng presented a memorial, thinking that it was caused by excessive yin, so he proposed a way of reducing yin to relieve disasters. The Han Dynasty's belief that disasters arise from an imbalance of Yin and Yang, as well as the advocacy of harmonizing these forces, represent another form of the ethical concept of retribution for wrongdoing and the idea th…	In the first year of the reign period Chuyuan, there was rebellion in Zhuya [Commandery] again. Armies were sent to defeat the rebels. 元帝初元元年，珠崖又反，發兵擊之。 Source:Hanshu, Biography of Yan, Zhu, Wuqiu, Zhufu, Xu, Yan, Zhong, Wang and Jia. Vol.64
-47	1) (in the third month)...An imperial edict said, "Verily, [We] have heard that when a capable and sage [ruler] is on the throne, the Yin and Yang are harmonious, the wind and rain are timely, the sun and moon are brilliant [without eclipses], the stars and zodiacal signs are in repose, and the many people are prosperous and peaceable and end in old age [the days allotted to them by] their fate. …	1)(三月)......詔曰：「蓋聞賢聖在位，陰陽和，風雨時，日月光，星辰靜，黎庶康寧，考終厥命。今朕恭承天地，託于公侯之上，明不能燭，德不能綏，災異並臻，連年不息。乃二月戊午，地震于隴西郡，毀落太上皇廟殿壁木飾，壞敗豲道縣城郭官寺及民室屋，壓殺人眾。山崩地裂，水泉湧出。天惟降災，震驚朕師。治有大虧，咎至於斯。夙夜兢兢，不通大變，深惟鬱悼，未知其序。間者歲數不登，元元困乏，不勝饑寒，以陷刑辟，朕甚閔之。郡國被地動災甚者無出租賦。赦天下。有可蠲除減省以便萬姓者，條奏，毋有所諱。丞相、御史、中二千石舉茂材異等直言極諫之士，朕將親覽焉。」 《漢書·元帝紀》 2)秋七月，詔曰：「歲比災害，民有菜色，慘怛於心。已詔吏虛倉廩，開府庫振救，賜寒者衣。今秋禾麥頗傷。一年中地再動。北海水溢，流殺人民。陰陽不和，其咎安在？公卿將何以憂之？其悉意陳朕過，靡有所諱。」 《漢書·元帝紀》	"[Let] those commanderies and kingdoms which have suffered severe visitations of earthquakes not pay the land or capitation taxes. [Let] an amnesty [be granted] to the empire." 郡國被地動災甚者無出租賦。赦天下。 Source: Hanshu, The Annals of Emperor Yuan Tramslation:Ban G, Dubs H (1938) The history of the fomer Han dynasty. Waverly Press, Baltmore. Note: This is part of the edict issued in the third month.	... of the [imperial] private gardens under [the supervision of the Chief Commandant] of Waters and Parks, of the Lower Park at Yichun, of the outer ponds of the Sharpshooters [who were under the supervision of] the Privy Treasurer, and of the hiding-places in the preserves, the ponds, and the fields [in the imperial parks]. They were lent to the poor people. ......水衡禁囿、宜春下苑、少府佽飛外池、嚴烃池田假與貧民。 Sour…	"[Let] those commanderies and kingdoms which have suffered severe visitations of earthquakes not pay the land or capitation taxes…." 郡國被地動災甚者無出租賦。 Source: Hanshu, The Annals of Emperor Yuan Tramslation:Ban G, Dubs H (1938) The history of the fomer Han dynasty. Waverly Press, Baltmore. Note: This is part of the edict issued in the third month.	1) ".... If there is anything [in the laws and ordinances] that can be suppressed, abolished, reduced, or dispensed with for the benefit of all people, [let] it be memorialized in detail, and let nothing be kept hidden. [Let] the Lieutenant Chancellor, , the [Grandee] Secretary, , and [officials ranking at] fully two thousand piculs recommend [persons who are] Accomplished Talents of Unusual Degr…	An imperial edict [ordered] the disestablishment of the chariots, carriages, dogs, and horses [under control of] the Yellow Gate… 詔罷黃門乘輿狗馬 Source: Hanshu, The Annals of Emperor Yuan Tramslation:Ban G, Dubs H (1938) The history of the fomer Han dynasty. Waverly Press, Baltmore.					"...an imperial edict [ordering] the officials to empty the storehouses and granaries, to open the warehouses and depots, to aid and rescue [the people], and to make grants of clothes to those who are cold." 「…...已詔吏虛倉廩，開府庫振救，賜寒者衣。」 Source: Hanshu, The Annals of Emperor Yuan Tramslation:Ban G, Dubs H (1938) The history of the fomer Han dynasty. Waverly Press, Baltmore. Note: This is part of the e…	The second year after the Emperor's enthronement, Shannan County of Zhuya Commandery rebelled again, and armies were sent to defeat them. Several counties also revolted, and they could not be suppressed for consecutive years. 上即位之明年，珠崖山南縣反，發兵擊之。諸縣更叛，連年不定 Source: Zizhi Tongjian	"...Recently for several years, there has been no good harvest, so that the great multitude are suffering and indigent, are unable to endure [the extremes of] famine and cold, and hence have become involved in punishments and chastisements…." 「......間者歲數不登，元元困乏，不勝饑寒，以陷刑辟......」 Source: Hanshu, The Annals of Emperor Yuan Tramslation:Ban G, Dubs H (1938) The history of the fomer Han dynasty. Waverl…
-46	1）In the summer, the fourth month, on [the day] Yiwei, there was a visitation [of fire] in White Crane Lodge at the Mao Tomb. The imperial edict said, "Recently a visitation of fire descended upon a Lodge in the [funerary park of Emperor] Wu. I tremble with respectful awe, being afraid and fearful and not comprehending [this] grievous vicissitude and prodigy. The blame [must lie] upon myslef. The…	1）夏四月乙未晦，茂陵白鶴館災。詔曰：「乃者火災降於孝武園館，朕戰栗恐懼。不燭變異，咎在朕躬。群司又未肯極言朕過，以至於斯，將何以寤焉！百姓仍遭凶阨，無以相振，加以煩擾虖苛吏，拘牽乎微文，不得永終性命，朕甚閔焉。其赦天下。」 《漢書·元帝紀》 2）六月，詔曰：「蓋聞安民之道，本繇陰陽。間者陰陽錯謬，風雨不時。朕之不德，庶幾群公有敢言朕之過者，今則不然。媮合苟從，未肯極言，朕甚閔焉。永惟烝庶之饑寒，遠離父母妻子，勞於非業之作，衛於不居之宮，恐非所以佐陰陽之道也。其罷甘泉、建章宮衛，令就農。百官各省費。條奏毋有所諱。有司勉之，毋犯四時之禁。丞相御史舉天下明陰陽災異者各三人。」 《漢書·元帝紀》	(In the summer, the fourth month)... The imperial edict said, "Recently a visitation of fire descended upon a Lodge in the [funerary park of Emperor] Wu. ...... Let an amnesty [be granted] to the empire." 夏四月......詔曰：「乃者火災降於孝武園館......其赦天下。」 Source: Hanshu, The Annals of Emperor Yuan Tramslation:Ban G, Dubs H (1938) The history of the fomer Han dynasty. Waverly Press, Baltmore. Note: This record i…	"...Let the guards at Ganquan and Jianzhang Palaces be disestablished and [let each person] be ordered to go to [his home and devote himself to] agriculture…" 其罷甘泉、建章宮衛，令就農。 Source: Hanshu, The Annals of Emperor Yuan Tramslation:Ban G, Dubs H (1938) The history of the fomer Han dynasty. Waverly Press, Baltmore. Note: This record is from the second edict of this year, and it was issued because of …		"...[Let matters] be memorialized in detail without keeping silent about anything. [Let] the high officials exert themselves and not violate the prohibitions for the four seasons. [Let] the Lieutenant Chancellor, and the [Grandee] Secretary, each present the three [best] persons in the empire who understand the visitations and prodigies [caused by] the Yin and Yang." 條奏毋有所諱。有司勉之，毋犯四時之禁。丞相御史舉天下明陰陽…	"Let the guards at Ganquan and Jianzhang Palaces be disestablished and [let each person] be ordered to go to [his home and devote himself to] agriculture. [Let] all the officials each reduce their expenses... 其罷甘泉、建章宮衛，令就農。百官各省費。 Source: Hanshu, The Annals of Emperor Yuan Tramslation:Ban G, Dubs H (1938) The history of the fomer Han dynasty. Waverly Press, Baltmore. Note: This record is from the …						[Because] the prefectures south of the mountains in Zhuya Commandery had rebelled, [the Emperor asked] the various officials generally for plans [to deal with this rebellion]; the Expectant Appointee, Jia Juanzhi, considered that it would be proper to abandon Zhuya [Commandery], in order to aid the common people [of northeastern China] in their famine of grain and vegetables. Thereupon Zhuya [Com…
-45			In the third month, he [again] traveled and favored Hedong [Commandery with a visit, where he] sacrificed to Sovereign Earth. He granted an amnesty to the convicts in Fenyin and granted: to the common people, one step in noble rank; to the women of a hundred households, an ox and wine; and to widowers, widows, and aged, silk. The places through which he passed were not to pay the land tax or capi…		The places through which he passed were not to pay the land tax or capitation taxes. 行所過無出租賦。 Source: Hanshu, The Annals of Emperor Yuan; Tramslation:Ban G, Dubs H (1938) The history of the fomer Han dynasty. Waverly Press, Baltmore. Note: This is from the amnesty of this year because the Emperor visited and held a sacrifice to Sovereign Earth.
-44	In the summer, the fourth month, a comet appeared in [the constellation] Shen, and an imperial edict said, "Since I am inadequate [to my position], the ranking [of persons] in their positions is not carefully scrutinized, and many offices have long been unoccupied and have not been filled with the [proper] persons, so that the great multitude has lost its hope [of good rulers. This situation] has…	夏四月，有星孛于參。詔曰：「朕之不逮，序位不明，眾僚久崃，未得其人。元元失望，上感皇天，陰陽為變，咎流萬民，朕甚懼之。乃者關東連遭災害，饑寒疾疫，夭不終命…...其令太官毋日殺，所具各減半。乘輿秣馬，無乏正事而已。罷角抵、上林宮館希御幸者、齊三服官、北假田官、鹽鐵官、常平倉。博士弟子毋置員，以廣學者。賜宗室子有屬籍者馬一匹至二駟，三老、孝者帛，人五匹，弟者、力田三匹，鰥寡孤獨二匹，吏民五十戶牛酒。」 《漢書·元帝紀》		…to the Fraternally Respectful and the [Diligent] Cultivators of the Fields, three bolts; 力田三匹 Source: Hanshu, The Annals of Emperor Yuan Tramslation:Ban G, Dubs H (1938) The history of the fomer Han dynasty. Waverly Press, Baltmore. Note: This record is from the edict of this year. For the full edict see the“Edict of self-indictment" column.	[Gong] Yu again considered that in antiquity people were not subjected to poll taxes, which began when Emperor Wu sent expeditions against the four barbarians. Then heavy taxes were imposed upon the people. People who have children are [required] to pay the kouqian tax as soon as the child has reached three years old. Thus the people are so much burdened that they kill the children at the moment …	"...Let no [restricted] number be established for the Disciples of the Erudits, in order to increase [the number of] students [in the Imperial University." 博士弟子毋置員，以廣學者。 Source: Hanshu, The Annals of Emperor Yuan Tramslation:Ban G, Dubs H (1938) The history of the fomer Han dynasty. Waverly Press, Baltmore. Note: 1) This record is from the edict of this year. For the full edict see the“Edict of s…	"...Let it be ordered that the Grand Provisioner shall not butcher daily and that each of his provisions be reduced by half. [Let] the imperial equipages and the horses that are fed be merely sufficient so that they do not fail in their proper business. "Let there be abolished: the competitive games, the Palaces and Lodges in Shang-lin Park that are rarely favored with an imperial [visit], the Th…					"Let the punishments be reduced in more than seventy matters; "Let there be expunged, for Imperial Household Grandees and under, down to Gentlemen-of-the-Palace, the ordinance [requiring punishment for those] who had made themselves responsible for their fathers, mothers, or own brothers or sisters. Let it be ordered that the Retinue and those who serve within the Majors' [Gates] to the palaces s…		[Gong Yu] also said, “...The merchants strive for profits. North, south, east, and west, they everywhere apply their wisdom and craftiness, and are able to dress with fine clothing and enjoy good food. Each year a merchant [makes] 20 percent profit [on his capital], and yet he pays no tax. In the case of the farmer, father and son are exposed in the midst of the field, escaping neither heat nor c…
-43	In the third month, an imperial edict said, "The Five Lords and the Three Kings gave office to the capable and employed the able in order to attain to extreme tranquility. Yet how could the misgovernment of today [come from the fact that] these common people are different [from those of ancient times]? The blame lies in my lack of intelligence and lack of means in becoming acquainted with capable…	三月，詔曰：「五帝三王任賢使能，以登至平，而今不治者，豈斯民異哉？咎在朕之不明，亡以知賢也。是故壬人在位，而吉士雍蔽。重以周秦之弊，民漸薄俗，去禮義，觸刑法，豈不哀哉！繇此觀之，元元何辜？其赦天下，令厲精自新，各務農畝。無田者皆假之，貨種、食如貧民。賜吏六百石以上爵五大夫，勤事吏二級，為父後者民一級，女子百戶牛酒，鰥寡孤獨高年帛。」 《漢書·元帝紀》	1) In [the period] Yongguang, the first year, in the spring, the first month, [the Emperor] traveled and favored Ganquan [Palace with a visit, where he performed] the suburban sacrifice at the altar to the Supreme [One], and [granted] pardon to the convicts in Yunyang [Commandery]. He granted: to the common people, one step in the noble rank; to the women of a hundred households, an ox and wine; …	"...Let an amnesty be granted to the empire and [let] it be ordered that [the people to whom amnesty has been granted] shall improve their personalities, renew themselves, and each pay attention to cultivating his acres. [Let] those [amnestied people] who have no cultivated fields all be loaned [fields] and be made loans of seed and food the same as for [ordinary] poor people. ... ......其赦天下，令厲精自…	(in the first month)...[Those places] through which he had passed in traveling were not to pay the land-tax or capitation taxes. 行所過毋出租賦。 Source: Hanshu, The Annals of Emperor Yuan Tramslation:Ban G, Dubs H (1938) The history of the fomer Han dynasty. Waverly Press, Baltmore. Note: This is from the first amnesty of this year.	In the second month, an imperial edict [ordered] the Lieutenant Chancellor and the [Grandee] Secretary, to recommend persons who were simple and straightforward, sincere and honest, humble and yielding to others, and who showed good behavior. The [Superintendent of] the Imperial Household should yearly examine and rank the Gentlemen and [Imperial] Retinue according to these [four qualities]. 二月，詔…				1) In the first year of the Yongguang Reign Period, frost fell in the spring, and the summer was cold. The sun was pale blue and had no brightness. The Emperor issued a decree again, blaming officials, "An official from the east reported that the people [are suffering from hunger to the extent that] parents and children cannot even support each other. Are officials like the Imperial Counsellor an…		The era name was changed from Chuyuan (初元) to Yongguang (永光), which imlies eternal brightness.		Note about government land here: "From the first mention of government land granted in 140 BCE. to the last action taken in 2 CE, the annals of the Han-shu register eleven grants. It is interesting to note that cases occurring from 69 BCE to 43 BCE, which is more than half of the total, mentioned the term land lent. In other words, with the exception of two early cases and the last three, governm…
-42	1) In the second year, in the spring, the second month, an imperial edict said, "...But the Yin and Yang have not yet accorded [with each other], the three luminaries have been veiled and indistinct, the great multitude have suffered greatly, have wandered, and have been scattered on the highways and paths. Robbers and brigands have arisen simultaneously. The high officials are, moreover, habitua…	1)二年春二月，詔曰：「......然而陰陽未調，三光晻昧。元元大困，流散道路，盜賊並興。有司又長殘賊，失牧民之術。是皆朕之不明，政有所虧。咎至於此，朕甚自恥。為民父母，若是之薄，謂百姓何！其大赦天下，賜民爵一級，女子百戶牛酒，鰥寡孤獨高年、三老、孝弟力田帛。」 《漢書·元帝紀》 2）三月壬戌朔，日有蝕之。詔曰：「朕戰戰栗栗，夙夜思過失，不敢荒寧。惟陰陽不調，未燭其咎。婁敕公卿，日望有效。至今有司執政，未得其中，施與禁切，未合民心。暴猛之俗彌長，和睦之道日衰，百姓愁苦，靡所錯躬。是以氛邪歲增，侵犯太陽，正氣湛掩，日久奪光。乃壬戌，日有蝕之。天見大異，以戒朕躬，朕甚悼焉。其令內郡國舉茂材異等賢良直言之士各一人。」 《漢書·元帝紀》 3）夏六月，詔曰：「間者連年不收，四方咸困。元元之民，勞於耕耘，又亡成功，困於饑饉，亡以相救。朕為民父母，德不能覆，而有其刑，甚自傷焉。其赦天下。」 《漢書·元…	1) "Let a general amnesty [be granted] to the empire, and [let there be] granted: to the common people, one step in noble rank; to the women of a hundred households, an ox and wine; to widowers, widows, orphans, childless, aged, the Thrice Venerable, the Filially Pious, the Fraternally Respectful, and the [Diligent] Cultivators of the Fields, silk. [Let there] also be granted: to the vassal kings…	...and the [Diligent] Cultivators of the Fields, silk. 孝弟力田帛 Source: Hanshu, The Annals of Emperor Yuan Tramslation:Ban G, Dubs H (1938) The history of the fomer Han dynasty. Waverly Press, Baltmore. Note: This is part of the edict issued in the second month of this year. The reason is three luminaries being veiled and indistinct. For full record see edict 1) of this year.		In the third month, on [the day] renxu, the first day of the month, there was an eclipse of the sun. The imperial edict said, "... Let it be ordered that the inner commanderies and kingdoms should each recommend one gentleman who is an Accomplished Talent of Unusual Degree [or] who is capable, good, and [able to] speak frankly." 三月壬戌朔，日有蝕之。詔曰：「......其令內郡國舉茂材異等賢良直言之士各一人。」 Source: Hanshu, The Annal…							In the autumn, the seventh month, the Western Qiang rebelled, and [the Emperor] sent the General of the Right, Feng Fengshi, to attack them. In the eighth month, the Grand Master of Ceremonies, Ren Qianqiu, was made the General Displaying his Majesty, with a separate command over five colonels. He advanced together with [Feng Fengshi]. 秋七月，西羌反，遣右將軍馮奉世擊之。八月，以太常任千秋為奮威將軍，別將五校並進。 Source: Hanshu, The …	"...the great multitude have suffered greatly, have wandered, and have been scattered on the highways and paths. Robbers and brigands have arisen simultaneously…" 元元大困，流散道路，盜賊並興。 Source: Hanshu, The Annals of Emperor Yuan Tramslation:Ban G, Dubs H (1938) The history of the fomer Han dynasty. Waverly Press, Baltmore. Note: This is part of the edict issued in the second month of this year. The reas…
-41					And in 41 B.C., the rate of suanfu (算賦,poll tax for adult) was 80 cash. Reference: Hsu CY (1980) Han Agriculture: The Formation of Early Chinese Agrarian Economy 206 BC-AD 220.		In the winter, there were reestablished the offices of the Salt and Iron [Government Monopoly] and a [restricted] number for the Disciples of the Erudits, because the [government] income was insufficient and too many of the common people had been exempted, so that there were not [enough persons] to furnish the required labor and required military service in the central [states] and at the borders…						In the third year, in the spring, the Western Qiang were pacified and the armies were demobilized. 三年春，西羌平，軍罷。 Source: Hanshu, The Annals of Emperor Yuan Tramslation:Ban G, Dubs H (1938) The history of the fomer Han dynasty. Waverly Press, Baltmore.	In the winter, the eleventh month, an imperial edict said, "Recently, in the second [month] of winter [i.e., the eleventh month], on [the day] jichou, there was an earthquake and a rain of water and a great fog. Robbers and brigands have arisen simultaneously; why do not the officials conform to the prohibitions for the seasons? 冬十一月，詔曰：「乃者己丑地動，中冬雨水，大霧，盜賊並起。吏何不以時禁？各悉意對。」 Source: Hanshu, The Annal…
-40	1) In the fourth year, in the spring, the second month, an imperial edict said, "I have succeeded to the cares of the most honorable [station, yet I] have not been able to enlighten or direct the people aright. Baneful calamities have frequently occurred, added to which the border regions have not been at peace and the armies [have had to be sent] out of [the border, so that, because of] taxes an…	1)四年春二月，詔曰：「朕承至尊之重，不能燭理百姓，婁遭凶咎。加以邊竟不安，師旅在外，賦斂轉輸，元元騷動，窮困亡聊，犯法抵罪。夫上失其道而繩下以深刑，朕甚痛之。其赦天下，所貸貧民勿收責。」 《漢書·元帝紀》 2)夏六月.....戊寅晦，日有蝕之。詔曰：「蓋聞明王在上，忠賢布職，則群生和樂，方外蒙澤。今朕晻于王道，夙夜憂勞，不通其理，靡瞻不眩，靡聽不惑，是以政令多還，民心未得，邪說空進，事亡成功。此天下所著聞也。公卿大夫好惡不同，或緣姦作邪，侵削細民，元元安所歸命哉！乃六月晦，日有蝕之。詩不云虖？『今此下民，亦孔之哀！』自今以來，公卿大夫其勉思天戒，慎身修永，以輔朕之不逮。直言盡意，無有所諱。」 《漢書·元帝紀》	In the fourth year, in the spring, the second month, an imperial edict said, "...Let an amnesty [be granted] to the empire. [Let] their debts not be collected from the poor people to whom loans were made." 四年春二月，詔曰：「......其赦天下，所貸貧民勿收責。」 Source: Hanshu, The Annals of Emperor Yuan Tramslation:Ban G, Dubs H (1938) The history of the fomer Han dynasty. Waverly Press, Baltmore. Note: This is part of t…	In the fourth year, in the spring, the second month, an imperial edict said, "...Let an amnesty [be granted] to the empire. [Let] their debts not be collected from the poor people to whom loans were made." 四年春二月，詔曰：「......其赦天下，所貸貧民勿收責。」 Source: Hanshu, The Annals of Emperor Yuan Tramslation:Ban G, Dubs H (1938) The history of the fomer Han dynasty. Waverly Press, Baltmore. Note: This is part of t…		In the summer, the sixth month,...on [the day] wuyin, the last day of the month, there was an eclipse of the sun. The imperial edict said, … "From this time and henceforth, let the ministers and grandees exert themselves and think upon Heaven's warning. [Let] them be careful of themselves and cultivate far-reaching [thoughts], in order to support [Us because of] Our inadequacies, speaking frankly…								"...Baneful calamities have frequently occurred, added to which the border regions have not been at peace and the armies [have had to be sent] out of [the border, so that, because of] taxes and transportation [of supplies], the great multitude have been troubled and agitated, are exhausted and suffering without any assistance, and have violated the laws and fallen into crime..." 「......婁遭凶咎。加以邊竟不…
-39												In the autumn, in Yingchuan [Commandery], the streams overflowed, carrying away and killing people. The officials and [imperial] retinue whose [native] county had suffered injury were given a vacation, and the officers and soldiers [among the drafted men who came from those prefectures] were sent home. 秋，潁川水出，流殺人民。吏、從官縣被害者與告。士卒遣歸。 Source: Hanshu, The Annals of Emperor Yuan Tramslation:Ban G, Dubs…		"Since the repair of the dikes of the Yellow River in 109 BCE, a number of efforts had been made to prevent floods. Between the years 95 and 66 BCE, secondary outlets and supplementary channels had been dug to relieve the heavy press of water downstream; but sufficient attention had not been paid to the need for dredging and maintenance, and major breaches curred in 39 and 29 BCE." Reference: The…
-38
-37			In the third month, [the Emperor] traveled and favored Hedong [Commandery with a visit, where he] sacrificed to Sovereign Earth.[The Emperor] increased the rank of the Grand Administrators of the three He Commanderies [and of large] commanderies [to that of fully two thousand piculs. Commanderies with] 120,000 households were made `large commanderies'. In the summer, the fourth month, an amnesty …
-36													1) (In 36 BCE), "one of the more powerful leaders of the Xiongnu, named Zhizhi (郅支), was resentful of Chinese policy; he was jealous of the friendly reception that had been accorded to his rival Chanyu Huhanye (呼韓邪), while his own overtures had been rejected. By way of revenge, Zhizhi sought help from Sogdiana; he hoped to damage Han's interests in Central Asia by such actions as raiding or captu…
-35	In the summer, the fourth month, an imperial edict said, "I have succeeded to the glorious achievements of our imperial predecessors. Morning and night [I] have been respectfully attentive, fearing lest [I may] not be capable in [my] duties. Recently the Yin and Yang have not accorded [with each other], and the five elements have lost their order, so that the people have been famished. [I] have b…	夏四月，詔曰：「朕承先帝之休烈，夙夜栗栗，懼不克任。間者陰陽不調，五行失序，百姓饑饉。惟烝庶之失業，臨遣諫大夫博士賞等二十一人循行天下，存問耆老鰥寡孤獨乏困失職之人，舉茂材特立之士。相將九卿，其帥意毋怠，使朕獲觀教化之流焉。」 《漢書·元帝紀》	In the fourth year, in the spring, the first month, because Chanyu Zhizhi had been executed, information was made [to the Lords on High] in the Suburban Sacrifice and in the sacrifices [to the imperial ancestors in their] Temples, and an amnesty was granted to the empire. 四年春正月，以誅郅支單于告祠郊廟。赦天下。 Source: Hanshu, The Annals of Emperor Yuan Tramslation:Ban G, Dubs H (1938) The history of the fomer Han…			In the summer, the fourth month, an imperial edict said... and to recommend gentlemen who are accomplished talents and have especial eminence. [Let] the chancellors, generals, and nine high ministers apply themselves with all their minds and be not negligent, so that I shall be able to observe the propagation of [my] instruction and civilizing efforts." 夏四月，詔曰：「.....舉茂材特立之士。相將九卿，其帥意毋怠，使朕獲觀教化之流焉。」…					[We] have been pondering that the multitude [of people] have lost their occupations and [We] have visited and sent the Grandee-remonstrant and Erudit Ch'ang and others, twenty-one persons [in all], to travel about and examine the empire, to visit and inquire about the aged, widowers, widows, orphans, childless, and the people who are indigent, suffering, or have lost their work... 惟烝庶之失業，臨遣諫大夫博士賞…
-34	In the fifth year, in the spring, the third month, an imperial edict said, "Verily, [I] have heard that when an intelligent king rules the country, he makes plain what to like and dislike and fixes what should be rejected and accepted; he exalts respectfulness and yielding [to others], and then the common people cultivate their conduct. Hence when his laws are instituted, the common people do not…	五年春三月，詔曰：「蓋聞明王之治國也，明好惡而定去就，崇敬讓而民興行，故法設而民不犯，令施而民從。今朕獲保宗廟，兢兢業業，匪敢解怠，德薄明晻，教化淺微。傳不云虖？百姓有過，在予一人。』其赦天下，賜民爵一級，女子百戶牛酒，三老、孝弟力田帛。」 《漢書·元帝紀》	"...Let an amnesty [be granted] to the empire and let there be granted: to the common people, one step in noble rank; to the women of a hundred households, an ox and wine; and to the Thrice Venerable, the Filially Pious, the Brotherly Respectful, and the [Diligent] Cultivators of the Fields, silk." 「......其赦天下，賜民爵一級，女子百戶牛酒，三老、孝弟力田帛。」 Source: Hanshu, The Annals of Emperor Yuan Tramslation:Ban G, D…	1) ...to the common people, one step in noble rank; to the women of a hundred households, an ox and wine; and to the Thrice Venerable, the Filially Pious, the Brotherly Respectful, and the [Diligent] Cultivators of the Fields, silk… ...孝弟力田帛 Note: This is part of the edict issued in the third month of this year. 2) [The edict] also said, "Just now it is spring, the time when farmers and cultivato…
-33			...in the sixth month, on [the day] jiwei, the Heir-apparent ascended the imperial throne, presented himself in the Temple of [Emperor] Gao...In the seventh month, a general amnesty [was granted to] the empire. ......六月己未，太子即皇帝位，謁高廟......七月，大赦天下。 Source: Hanshu, The Annals of Emperor Cheng Tramslation:Ban G, Dubs H (1938) The history of the fomer Han dynasty. Waverly Press, Baltmore.										In the period Jingning, the first year, in the spring, the first month, the Xiongnu Chanyu Huhanye came to pay court. The imperial edict said, "The Xiongnu Chanyu Zhizhi abandoned and rebelled against the rules of proper conduct and principles of fealty and so has already suffered for his crimes, [whereas] Chanyu Huhanye has not forgotten [Our] favors and benefits. He has turned toward and strive…
-32	An imperial edict said, "Recently a visitation of fire descended upon an [imperial] ancestral temple and a comet appeared in the eastern quarter [of the heavens]---the rectification [of Our government] at its inception has [shown some] defect. What calamity [could be] greater! The Book of History says, `Verily, [when a portent occurred], the greatest kings of former [times] rectified their work.'…	詔曰：「乃者火災降於祖廟，有星孛于東方，始正而虧，咎孰大焉！《書》云：『惟先假王正厥事。』群公孜孜，帥先百寮，輔朕不逮。崇寬大，長和睦，凡事恕己，毋行苛刻。其大赦天下，使得自新。」 《漢書·成帝紀》	An imperial edict said, "… Let a general amnesty [be granted] to the empire, so that [everyone] may secure [an opportunity] to renew himself." 詔曰：「…...其大赦天下，使得自新。」 Source: Hanshu, The Annals of Emperor Cheng Tramslation:Ban G, Dubs H (1938) The history of the fomer Han dynasty. Waverly Press, Baltmore. Note: This is from the edict issued this year. For full edict sees the edict column.	...the [Diligent] Cultivators of the Fields, widowers, widows, orphans, and childless, cash and silk, to each proportionately; and to the officials and common people of fifty households, an ox and wine. …...孝弟力田、鰥寡孤獨錢帛，各有差，吏民五十戶牛酒。 Source: Hanshu, The Annals of Emperor Cheng Tramslation:Ban G, Dubs H (1938) The history of the fomer Han dynasty. Waverly Press, Baltmore.	...On that day a great wind uprooted large trees that were more than ten spans [in circumference] at the place for sacrifice in Ganquan [Palace].The commanderies and kingdoms more than four-tenths [of whose fields] had suffered calamitous visitations were [ordered] not to pay the land tax on cultivated fields. 是日大風，拔甘泉畤中大木十韋以上。郡國被災什四以上，毋收田租。 Source: Hanshu, The Annals of Emperor Cheng Tramslation…	In the summer, the fourth month, a yellow fog completely filled the four [quarters. The Emperor] asked the ministers and grandees widely [for an explanation, telling them] not to keep silent about anything. … 夏四月，黃霧四塞，博問公卿大夫，無有所諱。 Source: Hanshu, The Annals of Emperor Cheng Tramslation:Ban G, Dubs H (1938) The history of the fomer Han dynasty. Waverly Press, Baltmore.
-31			In the second year, in the spring, the first month, the altars to the Five [Lords on High] at Yong were abolished, and on [the day] xinsi, the Emperor first performed the suburban sacrifice at the place for the suburban sacrifice south of Chang'an. His imperial edict said, "...[hence I grant] an amnesty to the criminals who have been sentenced to shave their whiskers, in the prefectures which sup…		" ...[We] reduce the capitation taxes and poll-tax money by forty cash…." 「…...減天下賦錢，算四十。」 Source: Hanshu, The Annals of Emperor Cheng Tramslation:Ban G, Dubs H (1938) The history of the fomer Han dynasty. Waverly Press, Baltmore. Note: This is part of the amnesty. For full details see the amnesty column of this year.	In the second month, an imperial edict [ordered] the three capital [commanderies] and the inner commanderies each to recommend one person who was capable and good, sincere and upright. 二月，詔三輔內郡舉賢良方正各一人。 Source: Hanshu, The Annals of Emperor Cheng Tramslation:Ban G, Dubs H (1938) The history of the fomer Han dynasty. Waverly Press, Baltmore.	"Beginning in 31 B.C. the emperor took part in services to Heaven and Earth at shrines which had been newly erected on the southern and northern sides of Chang'an. Expensive progresses to the more distant sites were no longer necessary; earthenware vessels or calabashes replaced jades at the plain altars which were now chosen in preference to the gaily colored and highly decorated ones of the pas…
-30	In the winter, the twelfth month, on [the day] wushen, the first day of the month, there was an eclipse of the sun and in the night there was an earthquake in the Hall of Weiyang Palace. The imperial edict said, "Verily, [I] have heard that when Heaven gave birth to the multitude of common people, they were unable to rule themselves, [hence Heaven] set up princes for them, in order to rule and co…	冬十二月戊申朔，日有蝕之。夜，地震未央宮殿中。詔曰：「蓋聞天生眾民，不能相治，為之立君以統理之。君道得，則草木昆蟲咸得其所；人君不德，謫見天地，災異婁發，以告不治。朕涉道日寡，舉錯不中，乃戊申日蝕地震，朕甚懼焉。公卿其各思朕過失，明白陳之。『女無面從，退有後言。』丞相、御史與將軍、列侯、中二千石及內郡國舉賢良方正能直言極諫之士，詣公車，朕將覽焉。」 《漢書·成帝紀》	In the third year, in the spring, the third month, the criminals of the empire were [granted] an amnesty, and two steps in noble rank were granted to the Filially Pious, the Fraternally Respectful, and the [Diligent] Cultivators of the Fields. Defaulted land and capitation taxes, and what had been given in aid as loans were not to be collected. 三年春三月，赦天下徒。賜孝弟力田爵二級。諸逋租賦所振貸勿收。 Source: Hanshu, The A…	...and two steps in noble rank were granted to the Filially Pious, the Fraternally Respectful, and the [Diligent] Cultivators of the Fields 賜孝弟力田爵二級。 Source: Hanshu, The Annals of Emperor Cheng Tramslation:Ban G, Dubs H (1938) The history of the fomer Han dynasty. Waverly Press, Baltmore. Note: This is part of the amnesty issued in the third month.	...Defaulted land and capitation taxes, and what had been given in aid as loans were not to be collected. 諸逋租賦所振貸勿收。 Source: Hanshu, The Annals of Emperor Cheng Tramslation:Ban G, Dubs H (1938) The history of the fomer Han dynasty. Waverly Press, Baltmore. Note: This is part of the amnesty issued in the third month.	"...[Let] the Lieutenant Chancellor and the [Grandee] Secretary, with the generals, full marquises, and [officials ranking at] fully two thousand piculs, together with the inner commanderies and kingdoms, recommend gentlemen who are capable and good, sincere and upright, and able to speak frankly and admonish unflinchingly. [Let] them go to the [Majors in Charge of] the Official Carriages, and We…					In the autumn, within the [Hangu] Pass [region] there was a flood. In the seventh month, a little girl of Sishang, Chen Chigong, who heard that the high water was coming, ran and entered the city-gate, entered without authorization through the side gate of the Master of the Recipes, and reached [the area of] Weiyang Palace [under the control of] the Intendant of the [Imperial] Palace Parks, [beca…
