# Supplementary material for: Climatic and societal impacts of volcanic eruptions in the Western Han Dynasty (206 BCE–8 CE): a comparative study.
Source: Copernicus journal article supplement (doi:10.5194/cp-21-2061-2025), 2025-11-07
Supplement: Supplementary file 9 [file Table S4 Records of harvest conditions in the Western Han Dynasty-version 2.xlsx]

## Sheet: Table S4
Year	area	original text	translation	Source	reference	Translation Reference	note
-206
-205	Guanzhong	1) 關中大飢，米斛萬錢，人相食。令民就食蜀漢。 2) 故奉苑囿園池，令民得田之。	1) In Guanzhong there was a great famine; a hu of rice [or hulled millet cost] ten thousand cash [and] people ate each other. [The King of Han] ordered the people to go to Shu and Han(s) to eat. 2)Regarding the pastures, enclosures, gardens, and ponds of the former Qin [dynasty], he ordered that the common people were permitted to [make] cultivated fields of them.	1) Hanshu, Annals of Emperor Gaozu 2) Hanshu, Annals of Emperor Gaozu	The second record is from Hsu, C., 1980. Han Agriculture: The Formation of Early Chinese Agrarian Economy, 206 BC-AD 220 . University of Washington Press.	1) Ban, G. and Dubs, H. H.: The history of the former Han dynasty, Waverly Press, 1938. 2) Ban, G. and Dubs, H. H.: The history of the former Han dynasty, Waverly Press, 1938.
-204
-203
-202
-201
-200
-199
-198
-197
-196
-195
-194							At the end of the Chu-Han war, the remaining population in Guanzhong was very small. Based on the evidence that there were only about 500,000 people during the time of Emperor Hui, there should be less than 400,000 people in the beginning of Han in Guanzhong. (西汉人口地理）
-193
-192
-191
-190
-189
-188
-187
-186
-185
-184
-183
-182
-181
-180	the whole empire	1)贊曰：孝惠、高后之時，海內得離戰國之苦，君臣俱欲無為，故惠帝拱己，高后女主制政，不出房闥，而天下晏然，刑罰罕用，民務稼穡，衣食滋殖。 2) 孝惠、高后之間，衣食滋殖。	1) In eulogy we say: During the times of [Emperor] Hui and the Empress Lv Zhi, the world had succeeded in putting behind it the sufferings [during the period of] Contending States. Both ruler and subjects sought for effortlessness. Hence although Emperor Hui folded his hands and the Empress Lv Zhi, a female lord, assumed the rule and governed without going out of the doors to her apartments, yet …	1) Hanshu, Annals of Empress Lv Zhi 2) Hanshu, Treatise on Food and Money		1) Ban, G. and Dubs, H. H.: The history of the former Han dynasty, Waverly Press, 1938. 2) Swann, N.L., 1950. Food & money in ancient China: the earliest economic history of China to AD 25: Han Shu 24, with related texts, Han Shu 91 and Shih-chi 129.
-179	the whole empire	…...是以元年膏雨降，五穀登，此天之所以相陛下也。	Jia Shan addressed the Emperor, "… therefore, auspicious rain fell and there were bumper harvests. This is a sign of Heaven sending help to Your Majesty…"	Hanshu, Biography of Jiashan		Translated by the author	Not necessary reliable record, as the context is trying to complement the Emperor first so he could listen to the advice. Also, the year here is Yuannian, which can also be the era's name. So it is not necessary refers to this year, but can be a supplementary reference here. However, based on the context and situation of the recent years, this year's harvest should be good.
-178	the whole empire	晁錯復說上曰：…...今海內為一，土地人民之眾不避湯、禹，加以亡天災數年之水旱，而畜積未及者，何也？地有遺利，民有餘力，生穀之土未盡墾，山澤之利未盡出也，游食之民未盡歸農也。民貧，則姦邪生。貧生於不足，不足生於不農，不農則不地著，不地著則離鄉輕家，民如鳥獸，雖有高城深池，嚴法重刑，猶不能禁也。	Chao Cuo futhermore addressed the emperor, ...Today all within the seas are united into one [empire].The amount of land and the number of inhabitants, being great, are not inferior to those of Tang and Yu. In addition, there have been no calamities of flood nor of drought from Heaven which lasted for several years. But why are stores of supplies [for food and clothes] not as much as their’? [This…	Hanshu, Treatise on Food and Money	Hsu, C., 1980. Han Agriculture: The Formation of Early Chinese Agrarian Economy, 206 BC-AD 220 . University of Washington Press.	Swann, N.L., 1950. Food & money in ancient China: the earliest economic history of China to AD 25: Han Shu 24, with related texts, Han Shu 91 and Shih-chi 129..	Swann summarizes and comments, "insufficient supplies in storage demand full use of land and of man power"..
-177
-176
-175
-174
-173
-172
-171
-170
-169
-168	the whole empire	(十二年…)三月...詔曰：「道民之路，在於務本。朕親率天下農，十年于今，而野不加辟，歲一不登，民有飢色，是從事焉尚寡，而吏未加務也。吾詔書數下，歲勸民種樹，而功未興，是吏奉吾詔不勤，而勸民不明也。且吾農民甚苦，而吏莫之省，將何以勸焉？其賜農民今年租稅之半。」	An imperial edict said, "The road along which to guide the people is [to make them] devote themselves to fundamentals. We Ourselves have led the world in agriculture for ten years down to the present, yet to the countryside there has not been added any newly broken land, and [as soon as] one year has not a good harvest, the people have hungry looks. This [shows that] those who apply themselves to…	Hanshu, Annals of Emperor Wen		Ban, G. and Dubs, H. H.: The history of the former Han dynasty, Waverly Press, 1938.	It is an edict to further encourage farming activities with consideration of future bad harvest. The emperor pointed out that the previous effort was not enough and the farmers suffered. The information can imply a mediocre harvest during this time. However, the record of next year shows that there were good harvests in the past few years.
-167		是歲，制曰：「朕即位十三年於今，賴宗廟之靈，社稷之福，方內艾安，民人靡疾。間者比年登，朕之不德，何以颯此？皆 上帝諸神之賜也。	In this year the emperor issued a proclamation saying: It has now been thirteen years since I came to the throne. By the aid of the spirits of the ancestral temples and the blessing of the altars of the soil and grain, the land within the borders is at peace and my people are without distress. Moreover, for the past several years the empire has enjoyed good harvests. How could I, who am of no vir…	Shi ji 28: The Treatise on the Feng and Shan Sacrifices		Sima, Q. and Watson, B., 1993. Records of the Grand Historian. New York: Columbia University Press.
-166		明年(文帝十四年)，以歲比登，詔有司增雍五畤路車各一乘，駕被具…..	(In the 14th year of Emperor Wen), because of the good harvests in successive years, an edict was issued to instruct relevant officers to increase one sedan chair to each of the Five Shrines. All horses and carriages were fully decorated.	Hanshu, Treatise on Sacrifices		Translated by the author
-165		明年，黃龍見成紀...其夏，下詔曰：「有異物之神見於成紀，毋害於民，歲以有年。朕幾郊祀上帝諸神，禮官議，毋諱以朕勞。」	In the next year (the 15th year of Emperor Wen), a yellow dragon was seen in Chengji…This summer, an edict was issued, "Mysterious signs appeared in Chengji. No damage has been done to the people. On the contrary, there has been a good harvest this year. I wish to visit Yong to perform the suburban sacrifice. The officials [in charge of] the rites should have a discussion and give me their frank …	Hanshu, Treatise on Sacrifices		Translated by the author
-164
-163		(後元年...春三月)...詔曰：「間者數年比不登，又有水旱疾疫之災，朕甚憂之。愚而不明，未達其咎。意者朕之政有所失而行有過與？乃天道有不順，地利或不得，人事多失和，鬼神廢不享與？何以致此？將百官之奉養或費，無用之事或多與？何其民食之寡乏也！夫度田非益寡，而計民未加益，以口量地，其於古猶有餘，而食之甚不足者，其咎安在？無乃百姓之從事於末以害農者蕃，為酒醪以靡穀者多，六畜之食焉者眾與？細大之義，吾未能得其中。其與丞相列侯吏二千石博士議之，有可以佐百姓者，率意遠思，無有所隱。」	(In the spring, the third month)...An imperial edict said, "Recently for many years there have continually been no good harvests. Moreover there have been visitations of floods, droughts, sickness, and epidemics. We have been very much worried because of them. We are ignorant and not perspicacious and do not yet understand just what is to blame. We have been thinking: is there some fault in Our […	Hanshu, Annals of Emperor Wen		Ban, G. and Dubs, H. H.: The history of the former Han dynasty, Waverly Press, 1938.
-162		明年，匈奴數入邊，興兵守御。後歲少不登。	The following year (162 BC) the Xiongnu several times invaded the border and troops were raised to guard against further incursions. During the last years of his reign the harvests were not very plentiful.	Hanshu, Treatise on Sacrifices		Sima, Q. and Watson, B., 1993. Records of the Grand Historian. New York: Columbia University Press.	The original text is the same as in Shiji, so here we adopted the translation from Shiji, vol. 28.
-161
-160
-159
-158
-157
-156		春正月，詔曰：「間者歲比不登，民多乏食，夭絕天年，朕甚痛之。郡國或磽骥，無所農桑诒畜；或地饒廣，薦草莽，水泉利，而不得徙。其議民欲徙寬大地者，聽之。」	In the spring, the first month, an imperial edict said, "Recently, for successive years there have not been good harvests, so that many people are lacking food; early death is cutting short their natural [span of] years. We are very much pained at this [circumstance]. In some of the commanderies and kingdoms there are stony and narrow [regions] and there is no place for agriculture or sericulture…	Hanshu, Annals of Emperor Jing		Ban, G. and Dubs, H. H.: The history of the former Han dynasty, Waverly Press, 1938.
-155
-154
-153
-152
-151
-150
-149
-148
-147
-146
-145
-144
-143
-142		1）(….二年) 春，以歲不登，禁內郡食馬粟，沒入之。 夏四月，詔曰：「雕文刻鏤，傷農事者也；錦繡纂組，害女紅者也。農事傷則飢之本也，女紅害則寒之原也。夫飢寒並至，而能亡為非者寡矣。朕親耕，后親桑，以奉宗廟粢盛祭服，為天下先；不受獻，減太官，省繇賦，欲天下務農蠶，素有畜積，以備災害。彊毋攘弱，眾毋暴寡，老耆以壽終，幼孤得遂長。今歲或不登，民食頗寡，其咎安在？或詐偽為吏，吏以貨賂為市，漁奪百姓，侵牟萬民。縣丞，長吏也，奸法與盜盜，甚無謂也。」 2）為歲不登，禁天下食不造歲。 省列侯遣之國。 三月，匈奴入雁門。十月，租長陵田。 大旱。 衡山國、河東、雲中郡民疫。	1) In the spring, because in the [previous] year there had not been a [good] harvest, in the commanderies under [the Prefects] of the [Imperial] Capital, feeding horses with grain was prohibited and they were confiscated to the government. In the summer, the fourth month, an imperial edict said, "Carved ornaments and chiseled engravings are matters that injure agriculture. Brocade, embroidery, ve…	1）Hanshu, Annals of Emperor Jing 2）Shiji, the Basic Annals of Emperor Jing the Filial		1) Ban, G. and Dubs, H. H.: The history of the former Han dynasty, Waverly Press, 1938. 2)Sima, Q. and Watson, B., 1993. Records of the Grand Historian. New York: Columbia University Press.
-141		三年春正月，詔曰：「農，天下之本也。黃金珠玉，飢不可食，寒不可衣，以為幣用，不識其終始。間歲或不登，意為末者眾，農民寡也。其令郡國務勸農桑，益種樹，可得衣食物。吏發民若取庸采黃金珠玉者，坐臧為盜。二千石聽者，與同罪。」	In the third year, in the spring, the first month, an imperial edict said, "Agriculture is the foundation of the world. As to real gold, pearls, or jade, when one is hungry, they cannot be eaten; when one is cold, they cannot be worn. They are considered and used as objects of value, [but] one does not understand how their final or original [value came to be]. "Recently for some years there have …	Hanshu, Annals of Emperor Jing		Ban, G. and Dubs, H. H.: The history of the former Han dynasty, Waverly Press, 1938.
-140
-139
-138		(武帝)即位数岁，即位數歲，漢興七十餘年之閒，國家無事，非遇水旱之災，民則人給家足，都鄙廩庾皆滿，而府庫餘貨財。京師之錢累巨萬，貫朽而不可校。太倉之粟陳陳相因，充溢露積於外，至腐敗不可食。	By the time the present emperor had been on the throne a few years, a period of over seventy years had passed since the founding of the Han. During that time the Empire had met with no major disturbances so that, except in times of flood or drought, every person was well supplied and every family had enough to get along on, The granaries in the cities and the countryside were full and the governm…	Shi ji 30: The Treatise on the Balanced Standard	Zhang, D.E., 2004. A compendium of Chinese meteorological records of the last 3000 years (中国三千年气候记录总集). Jiangsu Education House, Nanjing	Sima, Q. and Watson, B., 1993. Records of the Grand Historian. New York: Columbia University Press.	The reference dates this record to 136 BCE. However, following this record is, "... Shortly after this time Zhuang Zhu, Zhu Maichen, and others invited the people of the region of Eastern Ou to move to China, intervening in the war between the two kingdoms of Yue, and the area between the Huai and Yangtze rivers, to which they were transferred, was put to great trouble and expense." Eastern Ou pe…
-137
-136
-135		(漢武帝發兵擊閩越，淮南王安上書諫): 間者，數年歲比不登，民待賣爵贅子以接衣食，賴陛下德澤振救之，得毋轉死溝壑。 四年不登，五年復蝗，民生未復。	(Emperor Wu sent armies to attack Min and Yue, Liu An, the King of Huainan, admonished): "recently, there have been no good harvests for years. People have to sell [aristocratic] ranks and collateralize their children for cloth and food. They need to rely on Your Majesty's benevolence to rescue them from a devastated situation. The bad harvests have continued for four years and there were locusts…	Hanshu, Biography of Yanzhu	Zhang, D.E., 2004. A compendium of Chinese meteorological records of the last 3000 years (中国三千年气候记录总集). Jiangsu Education House, Nanjing	Translated by the author
-134
-133
-132
-131
-130		(公孙弘):...今人主和德於上，百姓和合於下…... 故陰陽和，風雨時，甘露降，五穀登，六畜蕃，嘉禾興…...」	(Gongsun Hong)…Now Your Majesty's words and deeds align with virtue, and the people harmonize with the ruler… Thus, Yin and Yang are harmonious. Winds and rains come in the right season, sweet dew descends, crops flourish, livestock thrives, and rice plants grow vigorously...	Zizhi Tongjian, Han ji, Vol. 18		translated by the author	Not necessary refer to this exact year according to the context. It may refer to these years or around this time.
-129
-128	Guandong	(主父偃、徐樂皆上書言事:）"…...間者關東五穀不登，年歲未復，民多窮困，重之以邊境之事，推數循理而觀之，則民且有不安其處者矣。 不安故易動。"	(Zhufu Yan and Xu Le both addressed to the emperor) "...Recently the grain crops east of the Pass have not been good and the harvests have not yet returned to normal, so that many of the people are poor and starving. On top of this they are burdened by the military campaigns along the border. In view of this, if I were to attempt to predict the future on the basis of reason, I would say that the …	Zizhi Tongjian, Han ji, Vol 18.	Zhang, D.E., 2004. A compendium of Chinese meteorological records of the last 3000 years (中国三千年气候记录总集). Jiangsu Education House, Nanjing	Sima, Q. and Watson, B., 1993. Records of the Grand Historian. New York: Columbia University Press.	The same text as the record from Shiji 112: The Biographies of the Marquis of Pingjin and Zhufu Yan
-127
-126
-125
-124
-123
-122
-121
-120	Shandong	1) (元狩三年)遣謁者勸有水災郡種宿麥。舉吏民能假貸貧民者以名聞。 2) 山東被水災，民多飢乏，於是天子遣使者虛郡國倉座以振貧民。 猶不足，又募豪富人相貸假。尚不能相救，乃民於關以西，及充朔方以南新秦中，七十餘萬口，衣食皆仰給縣官。數歲，假予產業，使者分院護之，冠蓋相望。 其費以億計，不可勝數。	1) In the third year (of Yuanshou).... [The Emperor] sent Internuncios to exhort those commanderies which suffered from floods to plant winter wheat. They recommended [to the Emperor] those officials and common people who were able to lend to the poor people, and their names were reported. 2) The next year (120 BCE) the lands east of the mountains were troubled by floods and many of the people we…	1) Hanshu, Annals of Emperor Wu 2) Shi ji 30: The Treatise on the Balanced Standard	The second record is from: Zhang, D.E., 2004. A compendium of Chinese meteorological records of the last 3000 years (中国三千年气候记录总集). Jiangsu Education House, Nanjing	1) Ban, G. and Dubs, H. H.: The history of the former Han dynasty, Waverly Press, 1938. 2)Sima, Q. and Watson, B., 1993. Records of the Grand Historian. New York: Columbia University Press.	Note for source one: Yan Shigu says, "In the autumn or winter, they plant it, over the New Years it is ripe, hence it is called su 宿 wheat." The two records refer to the same area and the same flood of the year. According to record one, the harvest was already damaged, so people were encouraged to plant winter wheat. The second record provides additional information about the severity of the even…
-119
-118
-117
-116
-115	capital area/ Shandong	1)（元鼎二年）秋九月，詔曰：「仁不異遠，義不辭難。今京師雖未為豐年，山林池澤之饒與民共之。今水潦移於江南，迫隆冬至，朕懼其飢寒不活。江南之地，火耕水耨，方下巴蜀之粟致之江陵，遣博士中等分循行，諭告所抵，無令重困。吏民有振救飢民免其厄者，具舉以聞。」 2) 山東被河災，及歲不登數年，人或相食，方一二千里。 天子憐之，詔曰：「江南火耕水耨,令飢民得流就食江淮 間，欲留，留處。」遣使冠蓋相屬於道，護之，下巴蜀粟以振之。	1) In the autumn, the ninth month, an imperial edict said, "A benevolent [person] does not treat [people who come from] distant places differently [from the way he treats his neighbors]; a righteous [person] does not shun what is difficult. At present, since in the capital [districts] there has not been a prosperous harvest, [We] have shared with the common people the abundance of [Our] mountains…	1) Hanshu, Annals of Emperor Wu 2) Shi ji 30: The Treatise on the Balanced Standard	The second record is from: Zhang, D.E., 2004. A compendium of Chinese meteorological records of the last 3000 years (中国三千年气候记录总集). Jiangsu Education House, Nanjing	1) Ban, G. and Dubs, H. H.: The history of the former Han dynasty, Waverly Press, 1938. 2)Sima, Q. and Watson, B., 1993. Records of the Grand Historian. New York: Columbia University Press.	Shandong refers to the east of 崤山 (Xiao Mountain).
-114
-113		(六月，汾陰出土大銅鼎）... 天子曰：“間者河溢，歲數不登，故巡祭後土，祈為百姓育谷。今年豐廡未有報，鼎曷為出哉?”	In the summer, during the sixth month of this year (113 BCE)… The emperor announced, “Recently the Yellow River overflowed its banks and for several years the harvests were poor. Therefore I journeyed about the empire and performed sacrifices to the Earth Lord, praying for the sake of the common people that the grain might grow well. This year, though the harvest has been rich and plentiful, I ha…	Shiji, the Basic Annals of Emperor Wu	Zhang, D.E., 2004. A compendium of Chinese meteorological records of the last 3000 years (中国三千年气候记录总集). Jiangsu Education House, Nanjing	Sima, Q. and Watson, B., 1993. Records of the Grand Historian. New York: Columbia University Press.
-112		（元鼎五年）十一月辛巳朔旦，冬至。立泰畤于甘泉。天子親郊見，朝日夕月。詔曰：「...朕甚念年歲未咸登，飭躬齋戒，丁酉，拜況于郊。」	(In the fifth year of Yuanding era),In the eleventh month, the [day] xinsi, the first day of the month, in the morning, was the winter solstice; [the Emperor had previously] established the place for sacrifice to the Supreme [One] at Ganquan [Palace, and on this morning] the Son of Heaven in person made the suburban sacrifice and presented himself [to the Supreme One]. He made the morning sacrifi…	Hanshu, Annals of Emperor Wu		Ban, G. and Dubs, H. H.: The history of the former Han dynasty, Waverly Press, 1938.
-111
-110
-109		自河決瓠子後二十餘歲，歲因數不登，而梁、楚之地尤甚。 天子既封禅巡祭山川，其明年，旱，乾封少雨。天子乃使汲仁、郭昌发卒数万人塞瓠子决…	More than twenty years had passed since the Yellow River broke through its banks at Huzi. The break had not been repaired and the harvests were frequently poor, the damage being particularly severe in Liang and Chu. The emperor, having gone east to perform the Feng and Shan sacrifices (110 BCE), made a tour through the empire, sacrificing to various mountains and rivers. The following year (109 B…	Shi ji 29: The Treatise on the Yellow River and Canals	Zhang, D.E., 2004. A compendium of Chinese meteorological records of the last 3000 years (中国三千年气候记录总集). Jiangsu Education House, Nanjing	Sima, Q. and Watson, B., 1993. Records of the Grand Historian. New York: Columbia University Press.	Yellow River broke through its banks at Huzi was in 132 BCE
-108
-107
-106
-105
-104
-103
-102
-101
-100
-99
-98
-97
-96
-95
-94
-93
-92
-91
-90
-89	Xiongnu	(漢貳師將軍李廣利降匈奴，匈奴)遂屠貳師以祠。會連雨雪數月，畜產死，人民疫病，穀類不熟，單於恐，為貳師立祠室。	[Li Guangli, the General of Er'shi (Sutrishna) of Han, surrendered to the Xiongnu, but the Xiongnu killed him for a sacrifice. At that time there were heavy snows in Xiongnu for months. Livestock died (due to the cold weather), and people had diseases. The grains did not ripen. The Shanyu (of Xiongnu) was scared and, therefore built a temple for Li.	Hanshu, Biography of Xiongnu	Zhang, D.E., 2004. A compendium of Chinese meteorological records of the last 3000 years (中国三千年气候记录总集). Jiangsu Education House, Nanjing	Translated by the author
-88
-87
-86
-85		（始元二年）三月，遣使者振貸貧民毋種、食者。秋八月，詔曰：「往年災害多，今年蠶麥傷，所振貸種、食勿收責，毋令民出今年田租。」	In the third month, messengers were sent to assist and lend to those poor people who had no seed or food. In the autumn, the eighth month, an imperial edict said, "In the past [few] years there have been many visitations and calamities; this year the silk and wheat have been injured. Do not collect their debts from those who have been assisted or loaned seed and food. Let it not be ordered that t…	Hanshu, Annals of Emperor Zhao		Ban, G. and Dubs, H. H.: The history of the former Han dynasty, Waverly Press, 1938.
-84
-83		（始元四年）秋七月，詔曰：「比歲不登，民匱於食，流庸未盡還，往時令民共出馬，其止勿出。諸給中都官者，且減之。」	(In the 4th year of Shiyuan reign period) In the autumn, the seventh month, an imperial edict said, "For successive years there have not been good harvests and the common people have been lacking in food, [so that] those who have moved away [from their homes] to take employment have not yet all returned [home]. In the past, it was ordered that the common people should by groups contribute horses …	Hanshu, Annals of Emperor Zhao		Ban, G. and Dubs, H. H.: The history of the former Han dynasty, Waverly Press, 1938.
-82		見國家承武帝奢侈師旅之後，數為大將軍光言：「年歲比不登，流民未盡還，宜修孝文時政，示以儉約寬和，順天心，說民意，年歲宜應。」	[Du Yannian], witnessing the extravagance of Emperor Wu and the difficulties left by repeated military expeditions, advised Huo Guang, the Grand General several times, "There have been poor harvests for consecutive years. Farmers who left home have not all returned yet. We should restore the governance principles of Emperor Wen, advocate frugality, govern with leniency, follow the will of heaven,…	Hanshu, Biography of Du Yannian		Translated by the author
-81
-80
-79	the Three Adjuncts and the Grand Master of Ceremonies	六月，赦天下。詔曰：「朕閔百姓未贍，前年減漕三百萬石。頗省乘輿馬及菀馬，以補邊郡三輔傳馬。其令郡國毋斂今年馬口錢，三輔、太常郡得以叔粟當賦。」	In the sixth month, an amnesty [was granted] to the empire and an imperial edict said, "We pity [Our] subjects [because] they have not enough [food]. In previous years [We] have lessened the water transport [of grain] by three million piculs and have reduced considerably the horses [required] for [Our] carriages and conveyances, together with the horses of [the imperial] pastures, in order to sup…	Hanshu, Annals of Emperor Zhao		Ban, G. and Dubs, H. H.: The history of the former Han dynasty, Waverly Press, 1938.
-78		正月，罷中牟苑賦貧民。詔曰:“乃者民被水災，頗匱於食，朕虛倉瘭，使使者振困乏。其止四年毋漕。三年以前所振貸，非丞相、禦史所請，邊郡受牛者勿收責。”	(In the third year, in the spring,) the first month, ...Zhongmu Park was abolished and [its land] was distributed among the poor people. An imperial edict said, "Recently the common people have suffered from calamities of water and are sorely lacking in food. We will empty the granaries and storehouses and send messengers to relieve the suffering and indigent. Let it be ordered that in the fourth…	Hanshu, Annals of Emperor Zhao	Zhang, D.E., 2004. A compendium of Chinese meteorological records of the last 3000 years (中国三千年气候记录总集). Jiangsu Education House, Nanjing	Ban, G. and Dubs, H. H.: The history of the former Han dynasty, Waverly Press, 1938.
-77
-76
-75	the Three Adjuncts and the Grand Master of Ceremonies	（元鳳）六年...夏，赦天下。詔曰:「夫穀賤傷農，今三輔、太常穀減賤，其令以叔粟當今年賦。」	In the sixth year (of Yuanfeng reign period)... In the summer, an amnesty [was granted] to the empire. An imperial edict said, "Verily, when grain is cheap, it injures agriculture. Now the grain [in the districts of] the Three Adjuncts and the Grand Master of Ceremonies is getting lower and cheaper [in price]. Let it be ordered that beans and cereals may be used to take the place of this year's m…	Hanshu, Annals of Emperor Xuan		Ban, G. and Dubs, H. H.: The history of the former Han dynasty, Waverly Press, 1938.
-74
-73
-72
-71	the Three Adjuncts	五月，大旱。郡國傷旱甚者，民毋出租賦。三輔民就賤者，且毋收事，盡四年。	There was a great drought. In those commanderies and kingdoms that suffered greatly from the drought, the people [were permitted] not to pay the land tax or capitation taxes, and those among the common people of the three capital commanderies who had reached the lowest [conditions] were temporarily not to have [taxes] collected [from them] nor to be made to serve. [This remission] was to be ended…	Hanshu, Annals of Emperor Xuan	Zhang, D.E., 2004. A compendium of Chinese meteorological records of the last 3000 years (中国三千年气候记录总集). Jiangsu Education House, Nanjing	Ban, G. and Dubs, H. H.: The history of the former Han dynasty, Waverly Press, 1938.	Pay no land tax is a direct evidence of farm lands being affected. Therefore, harvest were affected as well.
-70		(本始)四年春正月，詔曰：「蓋聞農者興德之本也，今歲不登，已遣使者振貸困乏。其令太官損膳省宰，樂府減樂人，使歸就農業。丞相以下至都官令丞上書入穀，輸長安倉，助貸貧民。民以車船載穀入關者，得毋用傳。」	In the fourth year, in the spring, the first month, an imperial edict said, "Verily, [We] have heard that agriculture is the fundamental thing in making virtue flourish. [But] this year there has not been a good harvest. [We] have already sent messengers to aid and make loans to those who are distressed and indigent. Let it be ordered that the Grand Provisioner shall diminish the food [for the im…	Hanshu, Annals of Emperor Xuan		Ban, G. and Dubs, H. H.: The history of the former Han dynasty, Waverly Press, 1938.
-69
-68							In the time of Hsiian-ti (r. 74-49 BCE.), under the administration of Zheng ji (鄭吉)the number of farming soldiers in Kurla alone increased to 1,300. The grain produced there was used to support military campaigns against Turfan, which was at the time under the Xiongnu domination. It is interesting to note that on at least two occasions Han forces had to wait until after autumn harvests to launch …
-67
-66	Jiaodong, Bohai	…...膠東、渤海左右郡歲數不登，盜賊並起	…in Jiaodong and Bohai commandaries and the surrounding areas, there had been bad harvests for several years, and (the number of) burglary cases increased...	Hanshu, Biography of Zhang Chang	Chen, Yen-liang. "(Disaster Peaks of the Han Dynasty: A Political-Economic Analysis)兩漢災害高峰期-天災, 人禍與治亂盛衰的關聯性分析." Historical Inquiry (臺大歷史學報), no. 57 (2016): 47-116.	translated by the author	The reference puts it as a record of 66 BCE, but the original text does not specify a year. However, the increasing burglaries in this area were reported in this year. Bohai is within the Guandong area, a main farming area of the time. However, the development of agriculture was not even within Guandong. Farm work was not advanced in the Bohai area (reference: Xihai Renkou Dili), and Jiaodong sho…
-65
-64
-63
-62		1)比年豐，穀石五錢。 2)宣帝即位，用吏多選賢良，百姓安土，歲數豐穰，穀至石五錢，農人少利。	1) For successive years there had been abundant [harvests, so that] grain [reached the price of] five cash per shi (picul). 2)When the emperor Hsiian (73-49 b.c.) came to the throne, he employed government authorities (Zi) chosen for the most part for their worth and character. The hundred clans (that is, the people) were content on the land; year [after year harvests] were repeatedly abundant an…	1) Hanshu, Annals of Emperor Xuan 2) Hanshu, Treatise on Food and Money		1) Ban, G. and Dubs, H. H.: The history of the former Han dynasty, Waverly Press, 1938. 2) Swann, N.L., 1950. Food & money in ancient China: the earliest economic history of China to AD 25: Han Shu 24, with related texts, Han Shu 91 and Shih-chi 129..
-61	East of Zhangye	以書敕讓充國曰：…...將軍計欲至正月乃擊罕羌，羌人當獲麥，已遠其妻子，精兵萬人欲為酒泉、敦煌寇。邊兵少，民守保不得田作。今張掖以東粟石百馀，芻槁束數十。	[The Emperor] issued another decree to blame Zhao Chongguo, "… General, [you] plan to wait until the first month [of the year] to attack the Qiang tribe. By then, the Qiang people will have already harvested their wheat, transferred their women and children, and assembled an elite force of ten thousand to invade Jiuquan and Dunhuang. Our frontier forces are few, and if we need common people to de…	Hanshu, Biography of Zhao Chongguo		translated by the author
-60
-59
-58
-57
-56
-55
-54			In 54 BCE. when the price of gu, perhaps millet and/or wheat and rice fell to five cash a shi, it seems to have been due to overproduction at a time when the central government lacked a method for control of the grain market by purchase and storage.	Swann, N.L., 1950. Food & money in ancient China: the earliest economic history of China to AD 25: Han Shu 24, with related texts, Han Shu 91 and Shih-chi 129..		Swann, N.L., 1950. Food & money in ancient China: the earliest economic history of China to AD 25: Han Shu 24, with related texts, Han Shu 91 and Shih-chi 129..	This is a commentary made by Swann, on page 59.
-53
-52
-51
-50
-49
-48	Guandong	（初元元年）夏四月…...又曰：「關東今年穀不登，民多困乏。其令郡國被災害甚者毋出租賦。江海陂湖園池屬少府者以假貧民，勿租賦。賜宗室有屬籍者馬一匹至二駟，三老、孝者帛五匹，弟者、力田三匹，鰥寡孤獨二匹，吏民五十戶牛酒。」	In the summer, the fourth month… (an imperial edict) also said, "East of the [Hangu] Pass, the grain has not ripened this year and many of the common people are suffering or indigent. Let it be ordered that those kingdoms and commanderies which have been injured severely by this calamity shall not pay the land or capitation taxes, and that [the revenues of] the rivers, the Ocean, the reservoirs, …	Hanshu, Annals of Emperor Yuan		Ban, G. and Dubs, H. H.: The history of the former Han dynasty, Waverly Press, 1938.
-47	Guandong	詔曰：「…...間者歲數不登，元元困乏，不勝饑寒，以陷刑辟，朕甚閔之。郡國被地動災甚者無出租賦。」 …... 六月，關東饑，齊地人相食。秋七月，詔曰：「歲比災害，民有菜色，慘怛於心。已詔吏虛倉廩，開府庫振救，賜寒者衣。今秋禾麥頗傷。一年中地再動。北海水溢，流殺人民。陰陽不和，其咎安在？公卿將何以憂之？其悉意陳朕過，靡有所諱。」	An imperial edict said, "...Recently for several years, there has been no good harvest, so that the great multitude are suffering and indigent, are unable to endure [the extremes of] famine and cold, and hence have become involved in punishments and chastisements. We pity them very much.[Let] those commanderies and kingdoms which have suffered severe visitations of earthquakes not pay the land or…	Hanshu, Annals of Emperor Yuan		Ban, G. and Dubs, H. H.: The history of the former Han dynasty, Waverly Press, 1938.
-46
-45
-44	Guandong	四月，詔曰：“乃者關東連遭災害，飢寒疾疫，夭不終命。”	In the summer, the fourth month..."Recently, for successive [years], east of [Hangu] Pass there have occurred visitations and disasters of famine, cold, sickness, and epidemics, so that premature death has not [permitted the people] to live out their lives..."	Hanshu, Annals of Emperor Yuan		Ban, G. and Dubs, H. H.: The history of the former Han dynasty, Waverly Press, 1938.	This is a continous situation of the previous years. Thus, even though harvest situation is not mentioned, it implies the harvest had not been improved from previous years.
-43	the whole empire	1）(永光元年三月) 是月雨雪，隕霜傷麥稼，秋罷。 2）九月二日，陨霜杀稼，天下大饥。	1) (In the first year of Yongguang reign period, in the 3rd month) In this month it snowed and there was a fall of frost which injured the wheat harvest. 2) On the second day of the ninth month, a fall of frost damaged the grain harvest. The whole empire suffered a great famine.	1）Hanshu, Annals of Emperor Yuan 2）Hanshu, Treatise on Five Elements		1) Ban, G. and Dubs, H. H.: The history of the former Han dynasty, Waverly Press, 1938. 2) by the author
-42	the whole empire	1)夏六月，詔曰：「間者連年不收，四方咸困。元元之民，勞於耕耘，又亡成功，困於饑饉，亡以相救。朕為民父母，德不能覆，而有其刑，甚自傷焉。其赦天下。」 2)是時，歲比不登，京師谷石二百餘，邊郡四百，關東五百，四方飢饉，朝廷方以為憂，而遭羌變。	1) In the summer, the sixth month, an imperial edict said, "Recently for consecutive years, [the harvest] has not been gathered and the four quarters [of the empire] are all suffering. The great multitude of common people work hard at plowing and weeding, but it does not produce any results, so that they suffer from a famine of grain and vegetables, and there is no means by which they can be save…	1) Hanshu, Annals of Emperor Yuan 2) Hanshu, Biography of Feng Fengshi		1) Ban, G. and Dubs, H. H.: The history of the former Han dynasty, Waverly Press, 1938. 2) by the author
-41
-40
-39
-38
-37		(東郡人京房以災異言於元帝曰:) 今陛下即位以來，日月失明，星辰逆行，山崩泉湧，地震石陳，夏霜冬雷,春凋秋榮，隕霜不殺，水旱螟蟲，民人飢疫，盜賊不禁，刑人滿市，《春秋》所載災異盡備。	Jing Fang reported to Emperor Yuan: since the enthronement, the sun and the moon have lost their brightness (some later versions translate the original texts as “there were lunar and solar eclipses”), stars retrograded. Mountains collapsed, springs flooded, the earth quaked and meteorites fell. There were frosts in summer and thunders in winter. Flowers withered in spring, but trees flourished in…	Zizhi Tongjian, Han ji, Vol. 21		Translated by the author	This record provides supplimentary information that bad harvests from previous year had not been improved too much as the famines continued.
-36
-35
-34
-33
-32		十二月，作長安南北郊，罷甘泉、汾陰祠。 是日大風，拔甘泉時中大木十圍以上。 郡國被災什四以上，毋收田租。	In the twelfth month, [places] for the suburban sacrifices [to Heaven and Earth and their rulers] were made to the south and north of Ch'ang-an, [respectively], and the sacrifices [to these deities] at Ganquan [Palace] and at Fenyin, [respectively], were abolished. On that day a great wind uprooted large trees that were more than ten spans [in circumference] at the place for sacrifice in Ganquan …	Hanshu, Annals of Emperor Cheng		Ban, G. and Dubs, H. H.: The history of the former Han dynasty, Waverly Press, 1938.
-31
-30
-29
-28		至河平元年三月，旱，傷麥，民食榆皮。	In the first year of Heping reign period, in the 3rd month, (there was) a drought, wheat plants were damaged and people had to live on elm bark.	Hanshu, Treatise on Astronomy		translated by the author
-27
-26
-25
-24
-23
-22
-21
-20
-19
-18
-17
-16
-15		1)(永始二年）二月…...又曰：「關東比歲不登，吏民以義收食貧民、入穀物助縣官振贍者，已賜直，其百萬以上，加賜爵右更，欲為吏補三百石，其吏也遷二等。三十萬以上，賜爵五大夫，吏亦遷二等，民補郎。十萬以上，家無出租賦三歲。萬錢以上，一年。」 2)朕既不明，變異數見，歲比不登，倉廩空虛，百姓飢饉，流離道路，疾疫死者以萬數，人至相食，盜賊並興，群職曠廢, 是朕之不德而股肱不良也。	1) (In the seond year of Yongshi reign period), in the second month...It also said, "East of [Hangu] Pass for successive years there has not been a [good] harvest. To those officials and common people who, because of moral principles, have gathered and fed poverty-stricken people or have contributed grain or goods to assist the imperial government in helping and succoring [the poor], there have a…	1) Hanshu, Annals of Emperor Cheng 2) Hanshu, Biography of Xue Xuan		1) Ban, G. and Dubs, H. H.: The history of the former Han dynasty, Waverly Press, 1938. 2) Translated by the author
-14
-13
-12		往年郡國二十一傷於水災，禾黍不入。今年蠶麥咸惡。百川沸騰，江河溢決，大水泛濫郡國十五有餘。比年喪稼，時過無宿麥。百姓失業流散，群輩守關。	"Previously, twenty-one commanderies and kingdoms were damaged by floods, resulting in bad harvests of grains (common millet and spiked millet). This year, neither silkworms nor wheat is thriving. Rivers surged and the Yangtze and Yellow Rivers overflowed, causing floods in over fifteen commanderies and kingdoms. Crops have not been harvested for consecutive years. The right seasons for farming h…	Hanshu, Biography of Gu Yong	Zhang, D.E., 2004. A compendium of Chinese meteorological records of the last 3000 years (中国三千年气候记录总集). Jiangsu Education House, Nanjing	translated by the author	Grain type references Han Agriculture by Hsu.C (1980). A few versions of translations from Classical Chinese to modern Chinese consider the first sentence refers to last year instead of previous years. (E.g., Chen, Yen-liang, The Complete Translation of the Twenty-Four Histories by Xu Jiayi).
-11
-10
-9
-8
-7		上遂賜冊曰：「...惟君登位，於今十年，災害並臻，民被飢餓，加以疾疫溺死，關門牡開，失國守備，盜賊黨輩。…...間者郡國谷雖頗孰，百姓不足者尚眾…...」	…an imperial edict was sent [to Zhai], ”…you have been in this position for ten years; various calamities happened together. People are starving and suffering from diseases and plagues. Door locks have disappeared and the state is not well-defended. There are numerous bandits... Recently, although most commanderies have had harvests, many people still suffer from hunger...“	Hanshu, Biography of Zhai Fangjin		by the author
-6
-5	the whole empire	陰陽錯謬，歲比不登，天下空虛，百姓饑饉，父子分散，流離道路，以十萬數。	The (balance) of Yin and Yang is disrupted, and there have been poor harvests for consecutive years. The granaries of the empire are empty and people are starving. Families are separated on the way to relocate elsewhere. There are hundreds of thousands [who have been affected].	Hanshu, Biography of Kong Guang	Chen, Yen-liang. "(Disaster Peaks of the Han Dynasty: A Political-Economic Analysis)兩漢災害高峰期-天災, 人禍與治亂盛衰的關聯性分析." Historical Inquiry (臺大歷史學報), no. 57 (2016): 47-116.	translated by the author	The full context is "後數月遂策免光曰：「丞相者，朕之股肱，所與共承宗廟，統理海內，輔朕之不逮以治天下也。朕既不明，災異重仍，日月無光，山崩河決，五星失行，是章朕之不德而股肱之不良也。君前為御史大夫，輔翼先帝，出入八年，卒無忠言嘉謀，今相朕，出入三年，憂國之風復無聞焉。陰陽錯謬，歲比不登，天下空虛，百姓饑饉，父子分散，流離道路，以十萬數。 Thus, the Emperor mentioned this as the reasons to dismiss Kong Guang, which should be 5 BC.
-4
-3
-2
-1
1
2
3
4
5
6
7
8
