# Supplementary material for: Climatic and societal impacts of volcanic eruptions in the Western Han Dynasty (206 BCE–8 CE): a comparative study.
Source: Copernicus journal article supplement (doi:10.5194/cp-21-2061-2025), 2025-11-07
Supplement: Supplementary file 11 [file Table S5 Records of population changes in the Western Han Dynasty-version 2.xlsx]

## Sheet: Table S5
Year	direction	From	to	scale	cause	original text	translation	Translation Reference	Source	reference	note
-206
-205	1)&2)southwestward	1)&2)Guanzhong	1)&2)Shu and Han		1)&2) famine	1)關中大飢，米斛萬錢，人相食。令民就食蜀漢。 2)凡米石五千，人相食，死者過半。高祖乃令民得賣子，就食蜀漢。 3)到外黃，彭越將三萬人歸漢。	1) In Guanzhong there was a great famine; a hu of mi [rice or hulled millet cost] ten thousand cash [and] people ate each other. [The King of Han] ordered the people to go to Shu and Han(s) to eat. 2) Generally (205 BCE.) [the price of] husked grain mi was five thousand [cash]a picul shi. People ate human flesh; and more than half [of the population] died. The Founder of the [Han] thereupon order…	1)Ban, G. and Dubs, H. H.: The history of the former Han dynasty, Waverly Press, 1938. 2) Ban, G. and Swann, N. L.: Food and Money in Ancient China: The Earliest Economic History of China to A. D. 25 [Han Shu 24], Martino Publishing, 2013. 3)1)Ban, G. and Dubs, H. H.: The history of the former Han dynasty, Waverly Press, 1938.	1) Hanshu, Annals of Emperor Gaozu 2) Hanshu, Treatises on food and money 3) Hanshu, Annals of Emperor Gaozu
-204
-203
-202	1) westward	1) Guandong	1) Guanzhong		1)planned migration 2)planned migration	1)夏五月，兵皆罷歸家。詔曰：“諸侯子在關中者，覆之十二歲，其歸者半之。民前或相聚保山澤，不書名數，今天下已定，令各歸其縣，覆故爵田宅，吏以文法教訓辨告，勿笞辱。民以饑餓自賣為人奴婢者，皆免為庶人。軍吏卒會赦，其亡罪而亡爵及不滿大夫者，皆賜爵為大夫。故大夫以上賜爵各一級，其七大夫以上，皆令食邑，非七大夫以下，皆覆其身及戶，勿事。”......後九月，徙諸侯子關中。 2)（十二年三月詔書）……“吏二千石，徙之長安，受小第室。”	1) In the summer, the fifth month, the troops were all disbanded and returned to their homes. An imperial edict said, "The members of the noble families in Guanzhong are exempted [from service and taxes] for twelve years; those who have already returned [home are exempted for] half [that period]. As to the people who formerly had collected to take refuge in the mountains and marshes, whose names …	1)Ban, G. and Dubs, H. H.: The history of the former Han dynasty, Waverly Press, 1938. 2)Ban, G. and Dubs, H. H.: The history of the former Han dynasty, Waverly Press, 1938.	1）Hanshu, Annals of Emperor Gaozu 2）Hanshu, Annals of Emperor Gaozu	Ge, J.: The population and geography of Western Han (西汉人口地理), Commercial Press, Shanghai,2014.	1) The first record implies that there were vagrancy issues in the Empire. Thus, it is counted as a record. 2)The 2nd record is considered to be in this year in the reference, based on the information that it happened around settling in Guanzhong as the Han capital.
-201
-200	1) westward	1) Feng (county)	1) Guanzhong	1) over 10,000	1) planned migration 2) war	1)......高祖乃更築城寺市裏如豐縣，號曰新豐，徙豐民以充實之。 2) (韓王)信亡走匈奴	1)… Emperor Gaozu built another city with walls, official residences, markets, and wards like those of Feng, and named it Xin (new) Feng. He moved the people into the new city to fill it… 2) Han Xin (the King of Han)escaped and fled to the Xiongnu.	1) by the author 2) by the author	1) Ying Chao's comment on Hanshu, Annals of Emperor Gaozu 2) Hanshu, Annals of Emperor Gaozu	Ge, J.: The population and geography of Western Han (西汉人口地理), Commercial Press, Shanghai,2014.	1) The reference estimated that this transportation involved approximately several thousand to over 10,000 people. Note from Dub's translation of Hanshu: Ying Shao (ca. 140-206) tells that Gaozu's father was homesick and wanted to return home to Feng, but Gaozu built another city with its walls, its official residences, its markets, and its wards like those of Feng, calling it Xin Feng, lit. "the…
-199
-198	westward	Qi and Chu	Guanzhong	over 100,000	1)&2) planned migration	1)十一月，徙齊楚大族昭氏、屈氏、景氏、懷氏、田氏五姓關中，與利田宅。 2)(劉)敬從匈奴來，因言「匈奴河南白羊、樓煩王，去長安近者七百里，輕騎一日一夕可以至。秦中新破，少民，地肥饒，可益實。夫諸侯初起時，非齊諸田，楚昭、屈、景莫與。今陛下雖都關中，實少人。北近胡寇，東有六國強族，一日有變，陛下亦未得安枕而臥也。臣願陛下徙齊諸田，楚昭、屈、景，燕、趙、韓、魏後，及豪傑名家，且實關中。無事，可以備胡；諸侯有變，亦足率以東伐。此強本弱末之術也。」上曰：「善。」乃使劉敬徙所言關中十餘萬口。	1) In the eleventh month [the Emperor] removed to Guanzhong five great clans of Qi and Chu: the Zhao clan, the Qu clan, the Jing clan, the Huai clan, and the Tian clan, and gave them the advantage of its fields and dwellings. 2) Liu Jing returned from Xiongnu and said, "The Henan Baiyang and Loufan tribes of Xiongnu are only seven hundred Li away from Chang'an. Light cavalry can reach here within…	1) Ban, G. and Dubs, H. H.: The history of the former Han dynasty, Waverly Press, 1938. 2) By the author	1) Hanshu, Annals of Emperor Gaozu 2) Hanshu, Biography of Liu Jing / Zizhi Tongjian	Ge, J.: The population and geography of Western Han (西汉人口地理), Commercial Press, Shanghai,2014.	According to the reference, the impacts of the previous strategies (in 202 BCE) to increase the population in Guanzhong were limited. Vagrants moved back to their original places after the wars. The population of Guandong increased much faster than that of Guanzhong. Thus, this movement involved a population of more than 100,000. It was the first large-scale migration in the Western Han Dynasty. …
-197
-196					1) planned migration (past) 2)summary of previous time	1)夏四月，行自雒陽至。令豐人徙關中者皆復終身。應劭曰：「太上皇思欲歸豐，高祖乃更築城寺市裏如豐縣，號曰新豐，徙豐民以充實之。」師古曰：「徙豐人所居，即今之新豐古城是其處。復音方目反。」 2)五月，詔曰：「粵人之俗，好相攻擊，前時秦徙中縣之民南方三郡，使與百粵雜處	1) In the summer, the fourth month, [the Emperor] went from Luoyang to [the capital]. He ordered that the people of Feng who had been moved to Guanzhong should all be exempted [from taxes and service] for life. 2)In the fifth month an imperial edict said, "According to the customs of the people of [Nan-] Yue, they like to attack each other. At a previous time, the Qin[dynasty] moved people from t…	1) Ban, G. and Dubs, H. H.: The history of the former Han dynasty, Waverly Press, 1938. 2) Ban, G. and Dubs, H. H.: The history of the former Han dynasty, Waverly Press, 1938.	1) Hanshu, Annals of Emperor Gaozu 2) Hanshu, Annals of Emperor Gaozu	Ge, J.: The population and geography of Western Han (西汉人口地理), Commercial Press, Shanghai,2014.	1) This is a supplmentary report for the one in 200 BCE, implying that people moved to Xin Feng were from the old Feng city. 2) It is a supplmentary record about the population of Yue area in the South
-195					1)war 2)summary of situation	1)盧綰與數仟人居塞下候伺，幸上疾愈，自入謝。夏四月甲辰，帝崩於長樂宮。盧綰聞之，遂亡入匈奴。 2)訖十二年…...時大城名都民人散亡，戶口可得而數裁什二三，是以大侯不過萬家，小者五六百戶	1) Lu Wan with several thousand men stayed at the foot of the Barrier, waiting, if by good chance the Emperor's sickness should become better, to come in person to beg for pardon. [But] in the summer, the fourth month, on [the day] Jiachen, the Emperor died in the Changleng Palace. When Lu Wan heard of it, he thereupon fled to Xiongnu. 2)In the 12th year of Emperor Gaozu's reign period...common p…	1) Dubs, Homer H., trans. History of the Former Han Dynasty, by Pan Ku. Baltimore: Waverley Press, 1939 2) By the author	1)Hanshu, Annals of Emperor Gaozu 2)Hanshu, Table of meritorious officials during the reigns of (Emperors) Gao, Hui, Wen and Empress Gao
-194
-193
-192			Guanzhong		1) temporary labor 2) temporary labor	1)三年春，發長安六百里內男女十四萬六千人城長安，三十日罷。 2)六月，發諸侯王、列侯徒隷二萬人城長安。	1)In the third year, in the spring, there were sent from [the region] within six hundred li of Chang'an, 146,000 [persons], male and female, to build the city wall of Chang'an. In thirty days they were dismissed. 2) In the sixth month, from the [states of] the vassal kings and marquises, 20,000 criminals and retainers were sent to build the city wall of Chang'an.	1) Ban, G. and Dubs, H. H.: The history of the former Han dynasty, Waverly Press, 1938. 2) Ban, G. and Dubs, H. H.: The history of the former Han dynasty, Waverly Press, 1938.	1)Hanshu, Annals of Emperor Hui 2)Hanshu, Annals of Emperor Hui		1) The first record was temporary and had a return in one month, therefore it is not counted. 2) Note from translation: He Zhuo (1661-1722) remarks, "The distances of the vassal kingdoms [from the capital] were different, hence beforehand in the sixth month, these [people] were mobilized, causing each [group] to arrive at the [appointed] time. The building of the city wall was done in the spring,…
-191
-190					temporary labor	(五年)春正月，復發長安六百裏內男女十四萬五千人城長安，三十日罷。	In the spring, the first month, there were again sent from [the region] within six hundred li of Chang'an 145,000 men and women to build the city wall of Chang'an. In thirty days they were dismissed.	Ban, G. and Dubs, H. H.: The history of the former Han dynasty, Waverly Press, 1938.	Hanshu, Annals of Emperor Hui		The first record was temporary and had a return in one month, therefore it is not counted.
-189
-188	westward	Guandong	Guanzhong	22500	planned migration	孝惠帝葬安陵，徙關東倡優樂人五千戶以為陵邑。	Emperor Hui of Han was buried in Anling, and 5,000 households changyou (musicians and entertainers) from Guandong were moved to the the town (of Anling).		Guanzhongji	Ge, J.: The population and geography of Western Han (西汉人口地理), Commercial Press, Shanghai, 2014.	Year and scale is from the reference, p161
-187
-186
-185					flood	三年夏，江水、溢，流民四千餘家。	In the third year, in the summer, the Yangtze River [and the Han River] overflowed, carrying away more than four thousand families of common people.	Ban, G. and Dubs, H. H.: The history of the former Han dynasty, Waverly Press, 1938.	Hanshu, Annals of Empress Lv Zhi		Some scholar count this record as people moved away because of the flood.
-184
-183
-182
-181				2000	war	七年冬十二月，匈奴寇狄道，略二千餘人。	In the seventh year, in the winter, the twelfth month, the Xiongnu pillaged Didao and abducted more than two thousand people.	Ban, G. and Dubs, H. H.: The history of the former Han dynasty, Waverly Press, 1938.	Hanshu, Annals of Empress Lv Zhi
-180
-179
-178		2)Guanzhong			1) Policy 2) planned migration	1)......貧生於不足，不足生於不農，不農則不地著，不地著則離鄉輕家，民如鳥獸。雖有高城深池，嚴法重刑，猶不能禁也......亡農夫之苦，有仟伯之得。因其富厚，交通王侯，力過吏勢，以利相傾；千里游敖，冠蓋相望，乘堅策肥，履絲曳縞。此商人所以兼并農人，農人所以流亡者也。 2)詔曰：「......今列侯多居長安，邑逺，吏卒給輸費苦，而列侯亦無繇敎訓其民。其令列侯之國，為吏及詔所止者，遣太子。」.....	1) ...Poverty is born of insufficiency; insufficiency is born of lack of farming; lack of farming means that [the people] are not settled on the land; not settling down on the land then [means] that [the peoples] will desert their [native] townships, and neglect their families. [When] people [acting this way] are like birds and beasts, they cannot be restrained by prohibitions, even though there …	1) Ban, G. and Swann, N. L.: Food and Money in Ancient China: The Earliest Economic History of China to A. D. 25 [Han Shu 24], Martino Publishing, 2013. 2) Ban, G. and Dubs, H. H.: The history of the former Han dynasty, Waverly Press, 1938.	1) Hanshu, Treatise on Food and Money 2) Hanshu, Annals of Emperor Wen
-177		1)Guanzhong	1)N/A		1)planned migration 2)war	1).詔曰：「前日詔遣列侯之國，辭未行。丞相朕之所重，其為朕率列侯之國。」遂免丞相勃，遣就國。 2) 五月，匈奴入居北地、河南為寇。	1) The imperial edict said, "Sometime ago an imperial edict ordered the marquises to go to their states. [But they asked] to be excused and have not gone. The Lieutenant Chancellor is [the person] whom We honor [most]. Let him lead the marquises to their states for Us." Thereupon the Lieutenant Chancellor, [Zhou] Bo, was dismissed and sent to go to his state. 2)In the fifth month, the Xiongnu ent…	1)Ban, G. and Dubs, H. H.: The history of the former Han dynasty, Waverly Press, 1938. 2)Ban, G. and Dubs, H. H.: The history of the former Han dynasty, Waverly Press, 1938.	1) Hanshu, Annals of Emperor Wen 2) Hanshu, Annals of Emperor Wen		1) is the follow up record of the second record in 178 BCE. The Emperor ordered the marquises to leave Chang'an (Guanzhong), but they did not want to. So the Emperor ordered again.
-176
-175
-174					war and policy	上令昭予厲王書諫數之，曰：「......諸從蠻夷來歸誼及以亡名數自古者，內史縣令主。相欲委下吏，無與其禍，不可得也。」	Emperor Wen ordered Bo Zhao to send a long written remonstrance to King Li, advising him repeatedly, "..those who come to surrender from minority areas and those who are unregistered but reported to be residents are under the charge of local governors and the county magistrates. It is unlikely that the prime minister of the kingdom would shift responsibility to subordinates and claim no responsib…	by the author	Hanshu, Biography of the King of Huainan/ Zizhi Tongjian	Luo, T.: The problem of vagrancy in the Han Dynasty (漢代的流民問題), Taiwan Student Book Publishing House, Taipei, 1989.
-173
-172
-171
-170	westward	(Guandong)	Guanzhong	22500	planned migration	治霸陵，皆瓦器，不得以金銀銅錫為飾，因其山，不起墳。	When he constructed the Baling (Tomb), he altogether [used] objects of pottery and did not allow the use of gold, silver, copper, or tin as ornaments. He took advantage of [the rise of] the hill [where] his [grave was built], and did not raise a mound [upon his tomb].	Ban, G. and Dubs, H. H.: The history of the former Han dynasty, Waverly Press, 1938.	Hanshu, Annals of Emperor Wen	Ge, J.: The population and geography of Western Han (西汉人口地理), Commercial Press, Shanghai,2014.	Year and scale is from the reference, p161
-169			1) frontier		1)Planned migration 2) War	1)（晁錯上書）:陛下幸憂邊境，遣將吏發卒以治塞，甚大惠也。然令遠方之卒守塞，一歲而更，不知胡人之能，不如選常居者，家室田作，且以備之。以便為之高城深塹，具藺石，布渠答，復為一城其內，城間百五十步。要害之處，通川之道，調立城邑，毋下千家，為中周虎落。先為室屋，具田器，乃募辠人及免徒復作令居之；不足，募以丁奴婢贖辠及輸奴婢欲以拜爵者；不足，乃募民之欲往者。皆賜高爵，復其家。予冬夏衣，廩食，能自給而止。郡縣之民得買其爵，以自增至卿。其亡夫若妻者，縣官買予之。人情非有匹敵，不能久安其處。塞下之民，祿利不厚，不可使久居危難之地。胡人入驅而能止其所驅者，以其半予之，縣官為贖其民。如是，則邑里相救助，赴胡不避死。非以德上也，欲全親戚而利其財也。... (上從其言，募民徙塞下。) 2) 匈奴寇狄道	[Chao Cuo memorialized] , “Your Majesty has been concerned with the border problem. Officers are dispatched and soldiers are mobilized at stations along the border line. It is indeed your great consideration. Nevertheless, armies from distant places are sent to guard the border for one year after which they are to be replaced [by units] . The soldiers therefore are not able to be acquainted with …	1) Hsu, C., 1980. Han Agriculture: The Formation of Early Chinese Agrarian Economy, 206 BC-AD 220 . University of Washington Press. 2)Ban, G. and Dubs, H. H.: The history of the former Han dynasty, Waverly Press, 1938.	1)Hanshu, Biography of Chao Cuo 2)Hanshu, Annals of Emperor Wen	1) Hsu, C., 1980. Han Agriculture: The Formation of Early Chinese Agrarian Economy, 206 BC-AD 220 . University of Washington Press.	According to Hsu, this is a record from 178 BCE. However, the text is from ‘Memorial to the Throne on Guarding the Frontier and Developing Agriculture", which is considered an article from 169 BCE in Zizhi Tongjian. (Some says 166 BCE but that should be another memorial by Chao Cuo. According to Ge, Chao's strategy was not effective in practice, because there were quite a few abandoned lands in G…
-168						三月，除關無用傳。	In the third month, the [ customs] barriers were done away with and passports were no [longer] used.	Ban, G. and Dubs, H. H.: The history of the former Han dynasty, Waverly Press, 1938.	Hanshu, Annals of Emperor Wen
-167
-166				1)140,000 2)100,000	1) War 2) War	1)漢孝文皇帝十四年，匈奴單於十四萬騎入朝那、蕭關，殺北地都尉卬，虜人民畜產甚多，遂至彭陽。 2)遣三將軍軍隴西、北地、上郡，中尉周舍為衞將軍，郎中令張武為車騎將軍，軍渭北，車千乘，騎卒十萬人。	1) In the fourteenth year of Emperor Wen’s reign (166 BCE) the Chanyu led a force of 140,000 horsemen through the Chaona and Xiao passes, killing Sun Ang, the chief commandant of Beidi Commandery, and carrying off large numbers of people and animals. Eventually he rode as far as Pengyang... 2) [The Emperor] sent three generals to encamp in the Longxi, the Beidi, and the Shang Commanderies. The Pa…	1) Sima, Q. and Watson, B., 1993. Records of the Grand Historian. New York: Columbia University Press. 2) Ban, G. and Dubs, H. H.: The history of the former Han dynasty, Waverly Press, 1938.	1) Shiji 110: The Account of The Xiongnu 2) Hanshu, Annals of Emperor Wen
-165			frontier		planned migration	錯復言：...臣聞古之徙遠方以實廣虛也，相其陰陽之和，嘗其水泉之味，審其土地之宜，觀其魘木之饒，然後營邑立城， 制裡割宅，通田作之道，正阡陌之界，先為築室，家有一堂二內，門戶之閉，置器物焉，民至有所居，作有所用，此民所以輕去 故鄉勸之新色也。為置醫巫，以救疾病，以修祭祀，男女有昏，生死相卹，墳墓相從，種樹畜長，室屋完安，此所以使民樂其處而有長居之心也。	Chao Cuo again memorialized, “Your subject learned that in antiquity when people were moved to remote regions to fill up the extensive and unoccupied land, [the government] determined the harmony of yin and yang, tasted the flavor of the rivers and springs, examined the quality of the soil, and observed the natural resources of the plants and trees. Afterwards, it built a town and erected a city …	Hsu, C., 1980. Han Agriculture: The Formation of Early Chinese Agrarian Economy, 206 BC-AD 220 . University of Washington Press.	Hanshu, Biography of Chao Cuo	Hsu, C., 1980. Han Agriculture: The Formation of Early Chinese Agrarian Economy, 206 BC-AD 220 . University of Washington Press.
-164
-163
-162
-161
-160
-159
-158				30000	war	六年冬，匈奴三萬騎入上郡，三萬騎入雲中。	In the sixth year, in the winter, thirty thousand Hun horsemen entered the Shang Commandery and thirty thousand [Xiongnu] horsemen entered the Yunzhong [Commandery].	Ban, G. and Dubs, H. H.: The history of the former Han dynasty, Waverly Press, 1938.	Hanshu, Annals of Emperor Wen
-157					funeral	七年夏六月己亥，帝崩於未央宮......發近縣卒萬六千人，發內史卒萬五千人，臧郭穿覆土屬將軍武。賜諸侯王已下至孝悌力田金錢帛各有數。乙巳，葬霸陵。	In the seventh year, in the summer, the sixth month, on [the day] Jihai, the Emperor died in the Wei-yang Palace.His testamentary decree said, "…Let there be mobilized [for the funeral] sixteen thousand soldiers from the neighboring prefectures and fifteen thousand soldiers of the Prefect of the Capital. The burial of the outer coffin, the opening and replacing of the earth shall be in charge of …	Ban, G. and Dubs, H. H.: The history of the former Han dynasty, Waverly Press, 1938.	Hanshu, Annals of Emperor Wen
-156		(Guandong)			bad harvests and the lack of food/ permitted migration	春正月，詔曰：「間者歲比不登，民多乏食，夭絕天年，朕甚痛之。郡國或磽骥，無所農桑诒畜；或地饒廣，薦草莽，水泉利，而不得徙。其議民欲徙寬大地者，聽之。」	In the spring, the first month, an imperial edict said, "Recently, for successive years there have not been good harvests, so that many people are lacking food; early death is cutting short their natural [span of] years. We are very much pained at this [circumstance]. In some of the commanderies and kingdoms there are stony and narrow [regions] and there is no place for agriculture or sericulture…	Ban, G. and Dubs, H. H.: The history of the former Han dynasty, Waverly Press, 1938.	Hanshu, Annals of Emperor Jing		According to Ge (2014), it also provides evidence that some areas in Guandong were already overpopulated. It was encouraged to move from Guandong to Guanzhong to develop Guanzhong during that time. According to Luo (1989), the movement should be from Guandong to the North or to the vast underdeveloped area. It allowed people to move as they wished but did not enforce the migration.
-155
-154						四年春，復置諸關用傳出。	In the fourth year, in the spring, [the Emperor] reestablished the various [customs] barriers [and ordered] the use of passports for going out and in.	Ban, G. and Dubs, H. H.: The history of the former Han dynasty, Waverly Press, 1938.	Hanshu, Annals of Emperor Jing		Note of Translation: In 169 B.C. these barriers had been abolished. Cf. 4: 14a. The SC dates the present order in the intercalary ninth month (Oct./Nov., 153) and says, "He re-established the fords and [customs] barriers." Cf. Mh II, 500. Ying Shao says that this reestablishment was "because the Seven Kingdoms had just rebelled and to be prepared for any untoward circumstance."
-153
-152	westward	(Guandong)	Guanzhong	22500	planned migration	五年春正月，作陽陵邑。夏，募民徙陽陵，賜錢二十萬。	In the fifth year, in the spring, the first month, [the Emperor] built the Yang Tomb and the town [of Yang-ling].In the summer, [the Emperor] solicited common people to move to Yang-ling, granting them two hundred thousand cash.	Ban, G. and Dubs, H. H.: The history of the former Han dynasty, Waverly Press, 1938.	Hanshu, Annals of Emperor Jing
-151
-150
-149
-148					war	匈奴入燕。	The Xiongnu entered into [the kingdom of] Yan.	Ban, G. and Dubs, H. H.: The history of the former Han dynasty, Waverly Press, 1938.	Hanshu, Annals of Emperor Jing
-147
-146
-145
-144					war	六月，匈奴入雁門，至武泉，入上郡，取苑馬。吏卒戰死者二千人。	In the sixth month, the Huns entered into the Yanmen [Commandery] to Wuquan, and entered into the Shang Commandery, where they took the horses of the imperial pastures. Two thousand officers and soldiers died in battle…	Ban, G. and Dubs, H. H.: The history of the former Han dynasty, Waverly Press, 1938.	Hanshu, Annals of Emperor Jing		[如淳曰：「漢儀注太仆牧師諸苑三十六所，分布北邊、西邊。以郎為苑監，官奴婢三萬人，養馬三十萬疋。」]
-143
-142		1)Guanzhong			1)Policy 2)War	1)二年冬十月，省徹侯之國。 2)匈奴入雁門，太守馮敬與戰死。發車騎材官屯。	1) In the second year, in the winter, the tenth month, [the Emperor] dispensed with the marquises going to their states. 2)In the spring the Xiongnu entered into the Yanmen [Commandery] and its Grand Administrator, Feng Jing, died in battle with them. Chariots, cavalry, and skilled soldiers were sent to garrison [the Yanmen Commandery].	1)Ban, G. and Dubs, H. H.: The history of the former Han dynasty, Waverly Press, 1938. 2)Ban, G. and Dubs, H. H.: The history of the former Han dynasty, Waverly Press, 1938.	1)Hanshu, Annals of Emperor Jing 2)Hanshu, Annals of Emperor Jing
-141
-140					1)Policy/planned migration 2)Policy	1)...令列侯就國，除關，以禮為服制，以興太平。舉諦諸竇宗室無行者，除其屬藉。諸外家為列侯，列侯多尚公主，皆不欲就國…… 2)秋七月，詔曰：「衞士轉置送迎二萬人，鄭氏曰：「去故置新，常二萬人。」其省萬人。	1)...ordered the marquises to proceed to their territories, abolished the customs barriers, and changed the funeral ceremonies to conform with correct ritual practice, striving to bring about an era of peace and prosperity. In addition, they conducted an inquiry into the members of the various branches of the imperial family and the Dou family and expunged the names of anyone found guilty of misc…	1) By the author 2) Ban, G. and Dubs, H. H.: The history of the former Han dynasty, Waverly Press, 1938.	1)Hanshu, Biography of Dou Ying 2)Hanshu, Annals of Emperor Wu
-139
-138	1) &2) Northward	3) (guandong)	1)&2)Lujiang [Commandery] 3)Guanzhong	1)&2)over 40,000 3) 22,500	1)&2) surrender 3)planned migration	1)東甌請舉國徙中國，乃悉舉眾來，處江、淮之間。 2)建元三年，東甌王廣武侯望率其眾四萬余人來降，處廬江郡。 3)三年春，河水溢於平原，大饑，人相食。賜徙茂陵者戶錢二十萬，田二頃。	1) The king of Eastern Ou then requested that he be allowed to move the inhabitants of his state to China. Permission was granted, and he and all his people came and settled in the region between the Yangtze and Huai rivers. 2) In the third year of Jianyuan reign period, Wang, the Marquis of Guangwu and the King of Eastern Ou, led over 40,000 people to surrender (to Han) in Lujiang Commandery. 3)…	1) Sima, Q. and Watson, B., 1993. Records of the Grand Historian. New York: Columbia University Press. 2) by the author 3)Ban, G. and Dubs, H. H.: The history of the former Han dynasty, Waverly Press, 1938.	1) Shiji 114: The Account of Eastern Yue 2) Shiji 17: The Chronological Table of the Feudal Lords from the Beginning of the Han, Introduction 3) Hanshu, Annals of Emperor Wu		3) Year and scale from Ge (2014), p.161
-137
-136
-135
-134
-133
-132
-131
-130					construction and war	夏，發巴蜀治南夷道，又發卒萬人治雁門阻險。	In the summer, [men] from Ba and Shu [Commanderies] were mobilized to repair the roads to the southern barbarians and ten thousand soldiers were also mobilized to strengthen the narrow and difficult [places] in Yanmen [Commandery].	Ban, G. and Dubs, H. H.: The history of the former Han dynasty, Waverly Press, 1938.	Hanshu, Annals of Emperor Wu
-129					war	匈奴入上谷，殺略吏民。	The Xiongnu entered Shang-gu [Commandery] and killed and kidnapped officials and common people.	Ban, G. and Dubs, H. H.: The history of the former Han dynasty, Waverly Press, 1938.	Hanshu, Annals of Emperor Wu	Ge, J.: The population and geography of Western Han (西汉人口地理), Commercial Press, Shanghai,2014.	數千人盜邊，漁陽尤甚......公孫敖出代郡，為胡所敗七千。（匈奴传）
-128			2) Canghai (current Korea)	2)280,000	1) war 2) surrender	1)秋，匈奴入遼西，殺太守；入漁陽、雁門，敗都尉，殺略三千餘人。遣將軍衛青出雁門，將軍李息出代，獲首虜數千級。 2) 東夷薉君南閭等，口二十八萬人降，為蒼海郡。	1) In the autumn, the Xiongnu entered Liaoxi [Commandery] and killed its Grand Administrator. They entered Yuyang and Yanmen [Commanderies] and defeated a Chief Commandant, killing or kidnapping more than three thousand persons. [The Emperor] sent General Wei Qing out of Yanmen [Commandery] and General Li Xi out of Dai [Commandery]. They took several thousand heads and captives. 2) [Among] the ea…	1)Ban, G. and Dubs, H. H.: The history of the former Han dynasty, Waverly Press, 1938. 2)Ban, G. and Dubs, H. H.: The history of the former Han dynasty, Waverly Press, 1938.	1)Hanshu, Annals of Emperor Wu 2)Hanshu, Annals of Emperor Wu		Note: The commandery was abandoned in 126 BC and absorted n Lintun Commandery in 108 BC.
-127		3)(Guandong)	2) Shuofang (current inner Mongolia) 3)Guanzhong	2)100,000 3)22,500	1) war 2) planned migration 3) planned migration	1)匈奴入上谷、漁陽，殺略吏民千餘人。遣將軍衞青、李息出雲中，至高闕，遂西至符離，獲首虜數千級。收河南地，置朔方、五原郡。 2)夏，募民眾朔方十萬口。 3)又徙郡國豪傑及訾三百萬以上於茂陵。	1) The Xiongnu entered Shanggu and Yuyang [Commanderies], killing and kidnapping more than a thousand officials and common people. [The Emperor] sent Generals Wei Qing and Li Xi out of Yunzhong [Commandery]. They went to Gaoque and then west to Fuli, taking several thousand heads and prisoners. [Wei Qing] seized the territory south of the [Yellow] River, so that the commanderies of Shuofang and W…	1) Ban, G. and Dubs, H. H.: The history of the former Han dynasty, Waverly Press, 1938. 2) Ban, G. and Dubs, H. H.: The history of the former Han dynasty, Waverly Press, 1938. 3) Ban, G. and Dubs, H. H.: The history of the former Han dynasty, Waverly Press, 1938.	1)Hanshu, Annals of Emperor Wu 2)Hanshu, Annals of Emperor Wu 3)Hanshu, Annals of Emperor Wu		3) Year and scale from Ge (2014), p.161
-126					war	夏，匈奴入代，殺太守；入雁門，殺略千餘人。	In the summer, the Xiongnu entered Dai [Commandery] and killed its Grand Administrator. They entered Yan-men [Commandery] and killed and kidnapped more than a thousand people.	Ban, G. and Dubs, H. H.: The history of the former Han dynasty, Waverly Press, 1938.	Hanshu, Annals of Emperor Wu
-125					war	夏，匈奴入代、定襄、上郡，殺略數千人。	In the summer the Xiongnu entered Dai, Dingxiang, and Shang Commanderies, killing and kidnapping several thousand persons.	Ban, G. and Dubs, H. H.: The history of the former Han dynasty, Waverly Press, 1938.	Hanshu, Annals of Emperor Wu
-124					war	秋，匈奴入代，杀都尉。（略千余人）	In the autumn, the Xiongnu entered Dai [Commandery] and killed its Chief Commandant.(kipnapped over 1,000 people).	Ban, G. and Dubs, H. H.: The history of the former Han dynasty, Waverly Press, 1938.	Hanshu, Annals of Emperor Wu
-123				2) several ten-thousands	1) war 2) war	1) …...而漢亦亡兩將軍，軍三千餘騎。 2) 十一月，淮南王安、衡山王賜謀反，誅。黨與死者數萬人。	1)...but in the engagements the Han side lost two generals and over 3,000 cavalry. 2) In the eleventh month the King of Huainan, [Liu] An, and the King of Heng-shan, [Liu] Ci, who had plotted rebellion, were executed. Several ten-thousands of their associates died with them.	1) Sima, Q. and Watson, B., 1993. Records of the Grand Historian. New York: Columbia University Press. 2)Ban, G. and Dubs, H. H.: The history of the former Han dynasty, Waverly Press, 1938.	1) Shiji 110: The Account of The Xiongnu 2) Hanshu, Annals of Emperor Wu	1) Ge, J.: The population and geography of Western Han (西汉人口地理), Commercial Press, Shanghai,2014.
-122					war	匈奴入上谷，殺數百人。	The Xiongnu entered Shanggu [Commandery] and killed several hundred persons.	Ban, G. and Dubs, H. H.: The history of the former Han dynasty, Waverly Press, 1938.	Hanshu, Annals of Emperor Wu
-121	1)2)3) westward	1)&2)Shandong	3)western frontier 4)western frontier	4) 40,000	1)&2) droughts and floods 3) planned migration 4)surrender and establish new town 5) war	1)會渾邪等降漢，大興兵伐匈奴，山東水旱，貧民流徙，皆卬給縣官，縣官空虛。 2)歲馀，會渾邪等降，縣官費眾，倉府空，貧民大徙，皆卬給縣官，無以盡贍。 3)於是漢已得渾邪王，則隴西、北地、河西益少胡寇，徙關東貧民處所奪匈奴河南、新秦中以實之，而減北地以西戍卒半。 4)秋，匈奴昆邪王殺休屠王，並將其眾合四萬馀人來降，置五屬國以處之。以其地為武威、酒泉郡。 5）匈奴入雁門，殺略數百人。遣衛尉張騫、郎中令李廣皆出右北平。廣殺匈奴三千餘人，盡亡其軍四千人…...	1) Huiye King surrendered to the Han. The Han government sent a large-scale military campaign against the Xiongnu. The Shandong region suffered from floods and droughts, forcing poor people to flee to other regions. They relied on the government for food and clothing, but the granaries were empty. 2) A year or so later the armies marched off on several more expeditions, and the Hunye king and his…	1) by the author 2) Sima, Q. and Watson, B., 1993. Records of the Grand Historian. New York: Columbia University Press. 3) Sima, Q. and Watson, B., 1993. Records of the Grand Historian. New York: Columbia University Press. 4) Ban, G. and Dubs, H. H.: The history of the former Han dynasty, Waverly Press, 1938. 5) Ban, G. and Dubs, H. H.: The history of the former Han dynasty, Waverly Press, 1938.	1) Hanshu, Biography of Zhang Tang 2) Shi ji 30: The Treatise on the Balanced Standard 3) Shi ji 110: The Account of Xiongnu 4) Hanshu, Annals of Emperor Wu 5) Hanshu, Annals of Emperor Wu	2) Luo, T.: The problem of vagrancy in the Han Dynasty (漢代的流民問題), Taiwan Student Book Publishing House, Taipei, 1989.	According to the reference, the 2nd record happened in 119 BC. However, the surrender of Hunye was in 121 BCE, as in Zhizi Tongjian, Shiji and Hanshu, Treatise on food and money.
-120	1) westward	1) Guandong	1) western frontier		1) droughts and floods/ planned migration 2) war	1)歲馀，會軍數出，渾邪王等降，縣官費眾，倉府空。其明年，貧民大徙，皆仰給縣官，無以盡贍。卜式持錢二十萬予河南守，以給民。河南上富人助貧人者籍，天子見卜式名，識之，曰“是固前而欲輸其家半助邊"，乃賜式外繇四百人。 2) 秋，匈奴入右北平、定襄，殺略千餘人。	1) The following year a number of poor people were transferred to other regions, all of them depending upon the government for their support, and there were not enough supplies to go around. At this point Bu Shi took 200,000 cash of his own and turned the sum over to the governor of Henan to assist the people who were emigrating to other regions. 2)In the autumn, the Xiongnu entered Youbeiping an…	1) Sima, Q. and Watson, B., 1993. Records of the Grand Historian. New York: Columbia University Press. 2) Ban, G. and Dubs, H. H.: The history of the former Han dynasty, Waverly Press, 1938.	1) Shi ji 30: The Treatise on the Balanced Standard 2) Hanshu, Annals of Emperor Wu
-119	1) westward 4) Northward	1)&2)Guandong 4) West of Shuofang to Lingju	1)&2) western frontier	1)&2) 725,000 4)50,000-60,000	1)&2) flood & famine 3)war 4)garrison 5) war	1)山東被水災，民多飢乏，於是天子遣使者虛郡國倉座以振貧民。猶不足，又募豪富人相貸假。尚不能相救，乃徙貧民於關以西，及充朔方以南新秦中，七十餘萬口，衣食皆仰給縣官。數歲，假予產業，使者分院護之，冠蓋 相望。其費以億計，不可勝數。於是縣官大空。 2)四年冬，有司言關東貧民陝西、北地、西河、上郡、會稽凡七十二萬五千口，縣官衣食振業，用度不足，請收銀錫造白金及皮幣以足用。初算緹錢。 3)青至幕北圍單于，斬首萬九千級，至闐顏山乃還。去病與左賢王戰，斬獲首虜七萬馀級，封狼居胥山乃還。 4)漢渡河自朔方以西至令居。往往通渠，置田官吏卒五六萬人，稍蠶食，地接匈奴以北 5)四年，漢兩軍出塞伐匈奴，損失官私馬十一萬多匹，人員損失很大。	1) The next year (120 BC) the lands east of the mountains were troubled by floods and many of the people were reduced to starvation. The emperor dispatched envoys to the provinces and kingdoms to empty the granaries and relieve the sufferings of the poor, but there was not enough food to go around. He then called upon wealthy families to make loans to the needy, but even this did not remedy the s…	1) Sima, Q. and Watson, B., 1993. Records of the Grand Historian. New York: Columbia University Press. 2) Ban, G. and Dubs, H. H.: The history of the former Han dynasty, Waverly Press, 1938. 3) Ban, G. and Dubs, H. H.: The history of the former Han dynasty, Waverly Press, 1938. 4)by the author 5)by the author	1) Shi ji 30: The Treatise on the Balanced Standard 2) Hanshu, Annals of Emperor Wu 3) Hanshu, Annals of Emperor Wu 4) Hanshu, Biography of Xiongnu	5) Ge, J.: The population and geography of Western Han (西汉人口地理), Commercial Press, Shanghai,2014.	The flood happened in 120 BCE, but the migration should be in 119 BCE according to Hanshu.
-118			western frontier		planned migration	五年春三月......徙天下奸猾吏民於邊。	In the fifth year, in the spring, the third month…Cunning and troublesome officials and common people of the empire were transported to the boundaries.	Ban, G. and Dubs, H. H.: The history of the former Han dynasty, Waverly Press, 1938.	Hanshu, Annals of Emperor Wu
-117
-116
-115	southward	Shandong (East of Xiaoshan	the region of Yangtze and Huai River		flood, famine, bad harvest/ permitted migration	1) 山東被河災，及歲不登數年，人或相食，方一二千里。 天子憐之，詔曰：「江南火耕水耨,令飢民得流就食江淮 間，欲留，留處。」遣使冠蓋相屬於道，護之，下巴蜀粟以振之。 2)是時山東被河災，及歲不登數年，人或相食，方二三千里。天子憐之，令飢民得流就食江淮間，欲留，留處。使者冠蓋相屬於道護之, 下巴蜀粟以振焉。	1) At this time the lands east of the mountains were suffering from floods caused by the Yellow River, and for several years the harvests had been poor. Within an area of 1,000 or 2,000 li square, the distress was so great that people were reduced at times to cannibalism.The emperor, taking pity upon the plight of the people, issued an edict which read: “In the region of the Yangtze they burn the…	1) Sima, Q. and Watson, B., 1993. Records of the Grand Historian. New York: Columbia University Press. 2)Ban, G. and Swann, N. L.: Food and Money in Ancient China: The Earliest Economic History of China to A. D. 25 [Han Shu 24], Martino Publishing, 2013.	1) Shi ji 30: The Treatise on the Balanced Standard 2)Hanshu, Treatise on Food and Money
-114						三年冬，徙函谷關於新安	In the third year, in the winter, the Hangu [Pass] Barrier was moved to Xin'an.	Ban, G. and Dubs, H. H.: The history of the former Han dynasty, Waverly Press, 1938.	Hanshu, Annals of Emperor Wu		The Hangu Pass was moved east.
-113
-112			2) Lingju	2)several ten thousand	1) war 2) garrison	1)西羌眾十餘萬人反。與匈奴通使。攻安定。圍枹罕。匈奴入五原。殺太守。 2)明年，南粵反，西羌侵邊。天子為山東不澹，赦天下囚，因南方樓船士二十餘萬人擊粵，發三河以西騎擊羌，又數萬人度河築令居。	1) A group of a hundred thousand Western Qiang revolted and communicated by an envoy with the Xiongnu. They attacked Anding and besieged Fuhan. The Xiongnu entered Wuyüan [Commandery] and killed its Grand Administrator. 2) [In the summer of the] next year (112 BCE) the southern Yue rebelled,and [in the ninth moon] the western Qiangg raided the frontiers. On account of the fact that east of the mo…	1) Ban, G. and Dubs, H. H.: The history of the former Han dynasty, Waverly Press, 1938. 2) Ban, G. and Swann, N. L.: Food and Money in Ancient China: The Earliest Economic History of China to A. D. 25 [Han Shu 24], Martino Publishing, 2013.	1) Hanshu, Annals of Emperor Wu 2) Hanshu, Treatise on Food and Money
-111			1)Western frontier 2) Wuwei, Jiuquan, Zhangye, Dunhuang (western frontier)	1) 600,000	1) garrison 2) planned migration 3) war	1)初置張掖、酒泉郡，而上郡、朔方、西河、河西開田官，斥塞卒六十萬人戍田之。 2)秋，東越王餘善反，攻殺漢將吏…...又遣浮沮將軍公孫賀出九原，匈河將軍趙破奴出令居，皆二千餘里，不見虜而還。乃分武威、酒泉地置張掖、敦煌郡，徙民以實之。 3)六年冬十月，發隴西、天水、安定騎士及中尉，河南、河內卒十萬人，遣將軍李息、郎中令一自為征西羌，平之。	1) At the time (111 BCE) when the counties Zhangye and (Dunhuang) were first established, Kaitianguan (offices in charge of cultivation of land) and [conscripted] soldiers numbering six hundred thousand men, from Shang, Shuo-fang, Xihe, and [territory] west of the [Yellow] River, were [stationed] there to expand frontier walls and watch towers, and to garrison and cultivate the land. 2)In the aut…	1) Ban, G. and Swann, N. L.: Food and Money in Ancient China: The Earliest Economic History of China to A. D. 25 [Han Shu 24], Martino Publishing, 2013. 2) Ban, G. and Dubs, H. H.: The history of the former Han dynasty, Waverly Press, 1938. 3)Ban, G. and Dubs, H. H.: The history of the former Han dynasty, Waverly Press, 1938.	1)Hanshu, Treatise on Food and Money 2) Hanshu, Annals of Emperor Wu 3)Hanshu, Annals of Emperor Wu		1) People moving to these commanderies started from 119 BCE, according to Ge Jianxiong. The original text in Hanshu, Treatise on food and money is "Zhangye and Jiuquan". However, according to Swann, it is "Zhangye and Dunhuang were established in 111 BCE".
-110	northward	Dongyue	[the region] between the Yangtze and Huai Rivers		surrender/ planned migration	東越殺王余善降。詔曰：‘東越險阻反覆，為後世患，遷其民於江淮間。	[Some people of] Dongyue killed their king, Yushan, and surrendered. An imperial edict said, "Dongyue is an inaccessible and difficult [region]. It has been vacillating [in its allegiance] and would be a trouble in later reigns. Let its people be moved into [the region] between the Yangtze and Huai Rivers and thereupon let its land be emptied."	Ban, G. and Dubs, H. H.: The history of the former Han dynasty, Waverly Press, 1938.	Hanshu, Annals of Emperor Wu	Ge, J.: The population and geography of Western Han (西汉人口地理), Commercial Press, Shanghai,2014.	The rest of the Dong ou people moved to Han in that year.
-109					war	朝鲜王攻杀辽东都尉，乃募天下死罪击朝鲜	The King of Chaoxian attacked and killed the Chief Commandant [of the Eastern Section in] Liaodong [Commandery]; thereupon [the Emperor] solicited [all the] criminals in the empire [sentenced to] capital [punishment to go and] attack Chaoxian.	Ban, G. and Dubs, H. H.: The history of the former Han dynasty, Waverly Press, 1938.	Hanshu, Annals of Emperor Wu
-108	northwestward	Wudu	Jiuquan		revolt/planned migration	武都氐人反，分徙酒泉郡。	The Di [barbarians] of Wudu [Commandery] rebelled; they were divided [and a part of them] were transported to Jiuquan Commandery.	Ban, G. and Dubs, H. H.: The history of the former Han dynasty, Waverly Press, 1938.	Hanshu, Annals of Emperor Wu
-107	1)&2) (intend to move) westword	1)&2)Guandong	1)&2)frontier	1)&2) 2,000,000	1) &2) flood, lack of food 3) war	1)元封四年，關東流民二百萬口，無名數者四十萬，公卿議欲請徙流民於邊以適之...... 上報曰：「間者，河水滔陸，泛濫十餘郡，隄防勤勞，弗能讯塞，朕甚憂之......故為流民法，以禁重賦......委任有司，然則官曠民愁，盜賊公行。......今流民愈多，計文不改，君不繩責長吏，而請以興徙四十萬口，搖蕩百姓......」 2)[丞相]上书曰：“......城郭仓库空虚，民多流亡…...”天子曰：“仓廪既空，民贫流亡，而君欲请徙之，摇荡不安，动危之，而辞位，君欲安归难乎？ " 3) 匈奴寇边	1)In the fourth year of the Yuanfeng Reign Period, in the region east of the Hangu Pass, two million people were displaced. Four hundred thousand people were without household registration. The high officials discussed and intended to suggest that the Emperor move the vagrants to the frontier region to settle down. The Emperor replied with a decree, "Previously, the [Yellow] River overflowed onto…	1) By the author 2) Sima, Q. and Watson, B., 1993. Records of the Grand Historian. New York: Columbia University Press. 3)Ban, G. and Dubs, H. H.: The history of the former Han dynasty, Waverly Press, 1938.	1) Hanshu, Biography of Shi Fen 2) Shiji 103, The Biographies of Lord Wanshi and Zhang Shu 3) Hanshu, Annals of Emperor Wu
-106
-105
-104					war	遣貳師將軍李廣利發天下謫民西征大宛。	[The Emperor] sent the General of Sutrishna (Ershi), Li Guangli, to mobilize the reprobated common people of the empire, to go west and make an expedition against Ferghana (Dawan).	Ban, G. and Dubs, H. H.: The history of the former Han dynasty, Waverly Press, 1938.	Hanshu, Annals of Emperor Wu
-103					war	遣浚稽將軍趙破奴二萬騎出朔方擊匈奴，不還。	[The Emperor] sent the General of [Mount] Junji, Zhao Ponu, with twenty thousand cavalry, to go out of Shuofang [Commandery] and attack the Huns. He did not return.	Ban, G. and Dubs, H. H.: The history of the former Han dynasty, Waverly Press, 1938.	Hanshu, Annals of Emperor Wu
-102	return				1)Summary of previous time 2) war 3) war	1)故逮文、景四五世間，流民既歸，戶口亦息，列侯大者至三四萬戶，小國自倍，富厚如之。 2)發惡少年及邊騎，歲餘而出敦煌六萬人，負私從者不與。 3)秋，匈奴入定襄、雲中，殺略數千人，行壞光祿諸亭障；又入張掖、酒泉，殺都尉。	1) By the time of Emperor Wen and Jing of Han, four to five generations had passed and the vagrants had returned to their homelands. The population had also increased. Among the marquisates, the larger ones had fiefs of 30,000 to 40,000 households, while the smaller ones had doubled in size. The increase in wealth aligned with the increase in fiefs. 2)...freed all the skilled bowmen who were in p…	1) by the author 2) Sima, Q. and Watson, B., 1993. Records of the Grand Historian. New York: Columbia University Press. 3)Ban, G. and Dubs, H. H.: The history of the former Han dynasty, Waverly Press, 1938.	1) Hanshu, Table of meritorious officials during the reigns of (Emperors) Gao, Hui, Wen and Empress Gao 高惠高后文功臣表/ Zizhi Tongjian 2) Shiji 123, The Account of Dayuan 3) Hanshu, Annals of Emperor Wu
-101			2) Dunhuang Commandery westward to Yanze, Luntai, Quli	hundreds	1) policy 2) garrison 3) war	1) 徙弘農都尉治武關，稅出入者以給關吏卒食。 2)於是自敦煌西至鹽澤，往往起亭，而輪台、渠犁皆有田卒數百人，置使者校尉領護，以給使外國者。 3)(發屬國六千騎及郡國惡少年數萬人以往)......軍還，入玉門者萬餘人，馬千餘匹。	1) He (the emperor) moved the Chief Commandant of Hongnong [Commandery] to control Wu Pass; those going out and in [the Pass] were to be taxed in order to provide supplies for the officials and soldiers of the Pass. 2) Therefore, from Dunhuang Commandery westward to Yanze, stations (for post and guard) were established along the way. In places like Luntai and Quli, several hundred soldiers were s…	1)Ban, G. and Dubs, H. H.: The history of the former Han dynasty, Waverly Press, 1938. 2)by the author 3) by the author	1) Hanshu, Annals of Emperor Wu 2) Hanshu, Traditions of the Western Regions 3) Hanshu, Biography of Li Guangli
-100			Wuyuan Commandery		garrison	發謫戍屯五原。	Reprobated persons and exiles were sent to encamp [as guards] in WuYüan [Commandery].	Ban, G. and Dubs, H. H.: The history of the former Han dynasty, Waverly Press, 1938.	Hanshu, Annals of Emperor Wu
-99					war	又遣因杅將軍出西河，騎都尉李陵將步兵五千人出居延北，與單於戰，斬首虜萬餘級。陵兵敗，降匈奴。	[The Emperor] also sent the General of Yinyu to go out of Xihe [Commandery]. The Chief Commandant of Cavalry, Li Ling, leading five thousand foot-soldiers, went out of Juyan, went north, and fought [battles] with the Chanyu, cutting off heads and [taking] captives [to the number of] more than ten thousand. [Li] Ling's troops were defeated and [he] surrendered to the Xiongnu.	Ban, G. and Dubs, H. H.: The history of the former Han dynasty, Waverly Press, 1938.	Hanshu, Annals of Emperor Wu
-98					war	秋，匈奴入雁門，太守坐畏饗棄市。	In the autumn, the Huns entered Yanmen [Commandery]. Its Grand Administrator was sentenced for cowardice and timidity and was publicly executed.	Ban, G. and Dubs, H. H.: The history of the former Han dynasty, Waverly Press, 1938.	Hanshu, Annals of Emperor Wu
-97					war	發天下七科讁及勇敢士，遣貳師將軍李廣利將六萬騎、步兵七萬人出朔方。	[The Emperor] mobilized the seven classes of reprobated persons in the empire together with resolute and courageous gentlemen, and sent the General of Sutrishna (ErShi), Li Guangli, leading sixty thousand cavalry and seventy thousand foot-soldiers, to go out of Shuofang [Commandery]	Ban, G. and Dubs, H. H.: The history of the former Han dynasty, Waverly Press, 1938.	Hanshu, Annals of Emperor Wu
-96				27000	planned migration	徙郡國吏民豪桀於茂陵、雲陵。	Braves and stalwarts from among the officials and common people of the commanderies and kingdoms were moved to Maoling and YünLing.	Ban, G. and Dubs, H. H.: The history of the former Han dynasty, Waverly Press, 1938.	Hanshu, Annals of Emperor Wu		The scale is estimated by Ge Jianxiong (2014).
-95
-94
-93
-92
-91					1) bad governance 2) planned migration 3) war	1)征和二年春，制詔御史：「故丞相賀倚舊故乘高勢而為邪，興美田以利子弟賓客，不顧元元，無益邊穀，貨賂上流，朕忍之久矣…...又令耕者自轉，以困農煩擾畜者，重馬傷秏，武備衰減；下吏妄賦，百姓流亡；…」 2) 吏士劫略者，皆徙敦煌郡。 3) 匈奴入上谷、五原，殺略吏民。	1) In the second year of the Zhenghe Reign Period, in the spring, the Emperor decreed to the Grand Secretary, ”Gongsun He, the former Grand Chancellor, relied on old connections and abused his high position to commit wrongdoing. He seized good farmland to benefit his offspring, relatives and guests, disregarding the well-being of the people. The soldiers stationed at the border lacked food, but h…	1) by the author 2) by the author 3)Ban, G. and Dubs, H. H.: The history of the former Han dynasty, Waverly Press, 1938.	1) Hanshu, Biography of Liu Qumao 2) Hanshu, Annals of Emperor Wu 3) Hanshu, Annals of Emperor Wu
-90
-89					war and surrender	是時，漢恐車師兵遮重合侯，乃遣闓陵侯將兵別圍車師，盡得其王民眾而還。	At that time, the Han government was concerned that the troops of Cheshi might intercept the Marquis of Chonghe, so they sent the Marquis of Runling to lead the troops to besiege Cheshi. They captured the entire population of the Cheshi Kingdom and returned victorious.	by the author	Hanshu, Biography of Xiongnu
-88
-87					1) summary of previous time 2) war	1)承孝武奢侈馀敝师旅之后，海内虚耗，户口减半，光知时务之要，轻繇薄赋，与民休息。 2) 冬，匈奴入朔方，殺略吏民。	1) [Emperor Zhao] inherited the evils of extravagance and indulgence remaining from [the rule of Emperor] Wu and his military expeditions. [The country] within the [four] seas was depopulated and exhausted, the population was reduced by half. Huo Guang understood the important necessities of the period, so lightened the required public service and reduced the taxes, [thus] giving the people rest …	1) Ban, G. and Dubs, H. H.: The history of the former Han dynasty, Waverly Press, 1938. 2) Ban, G. and Dubs, H. H.: The history of the former Han dynasty, Waverly Press, 1938.	1)Hanshu, Annals of Emperor Zhao 2)Hanshu, Annals of Emperor Zhao
-86					summary of previous time	至昭帝時，流民稍還，田野益闢，頗有畜積。	At the time of the emperor Zhao (86-74 BCE) [those farmers who had] drifted away gradually returned [to their former homes and] fields, and wastelands were more than ever cultivated.	Ban, G. and Swann, N. L.: Food and Money in Ancient China: The Earliest Economic History of China to A. D. 25 [Han Shu 24], Martino Publishing, 2013.	Hanshu, Treatise on Food and Money
-85		1) the three capital commanderies	1) Yunling 2) Zhangye		1) planned migration 2) garrison	1)夏六月 ......徙三輔富人雲陵，賜錢，戶十萬。 2) 冬，發習戰射士詣朔方，調故吏將屯田張掖郡。	1) In the summer, the sixth month...Rich people from the three capital commanderies were moved to Yunling and each household was granted a hundred thousand cash. 2) In the winter, trained fighting-men and archers were mobilized and sent to Shuofang [Commandery]. Retired officers were selected to command the agricultural garrisons in Zhangye Commandery.	1) Ban, G. and Dubs, H. H.: The history of the former Han dynasty, Waverly Press, 1938. 2) Ban, G. and Dubs, H. H.: The history of the former Han dynasty, Waverly Press, 1938.	1)Hanshu, Annals of Emperor Zhao 2)Hanshu, Annals of Emperor Zhao
-84			Yunling		planned migration	秋，募民徙雲陵，賜錢田宅。	In the autumn, common people were solicited to move to Yun-ling, and [those who did so] were to be granted money, fields, and residences.	Ban, G. and Dubs, H. H.: The history of the former Han dynasty, Waverly Press, 1938.	Hanshu, Annals of Emperor Zhao
-83					bad harvests and the lack of food	(始元四年）秋七月，詔曰：「比歲不登，民匱於食，流庸未盡還，往時令民共出馬，其止勿出。諸給中都官者，且減之。」	(In the 4th year of Shiyuan reign period) In the autumn, the seventh month, an imperial edict said, "For successive years there have not been good harvests and the common people have been lacking in food, [so that] those who have moved away [from their homes] to take employment have not yet all returned [home]. In the past, it was ordered that the common people should by groups contribute horses …	Ban, G. and Dubs, H. H.: The history of the former Han dynasty, Waverly Press, 1938.	Hanshu, Annals of Emperor Zhao
-82					bad harvests and previous war	見國家承武帝奢侈師旅之後，數為大將軍光言：「年歲比不登，流民未盡還，宜修孝文時政，示以儉約寬和，順天心，說民意，年歲宜應。」	[Du Yannian], witnessing the extravagance of Emperor Wu and the difficulties left by repeated military expeditions, advised Huo Guang, the Grand General several times, "There have been poor harvests for consecutive years. Farmers who left home have not all returned yet. We should restore the governance principles of Emperor Wen, advocate frugality, govern with leniency, follow the will of Heaven,…	by the author	Hanshu, Biography of Du Yannian/Zizhi Tongjian
-81
-80					war	武都氐人反......大鴻臚廣明將三輔、太常徒，皆免刑，擊之。	The Di [barbarians] in Wudu [Commandery] rebelled... Tian Guangming, leading convicts [from the districts under the control of] the Three Adjuncts and the Grand Master of Ceremonies, all of which [convicts] were freed from punishment.	Ban, G. and Dubs, H. H.: The history of the former Han dynasty, Waverly Press, 1938.	Hanshu, Annals of Emperor Zhao
-79
-78					war	匈奴三千騎入五原，殺略數千人	Three thousand cavalry from Xiongnu entered Wuyuan Commandery, killing and kidnapping thousands of people.	by the author	Wenxian Tongkao
-77			Yixun		garrison	元鳳四年......於是漢遣司馬一人、吏士四十人，田伊循以填撫之。	In the fourth year of the Yuanfeng reign period... [the Emperor] sent [the secretary of] the minister of war and 40 officials to command the agricultural garrisons in Yixun.	by the author	Hanshu, Traditions of the Western Regions		According to Ge Jianxiong, this only involves a small population and it is an unstable movement. 《西汉屯田的几个问题》also mentions that this is small in scale and it is only a symbolic move.
-76	eastward	the three capital commanderies	Liaodong		planned migration	六月，發三輔及郡國惡少年吏有告劾亡者，屯遼東。	In the sixth month, the evil young people about whom the officials had been informed and who had been accused, but had absconded, were sent out from the three capital commanderies together with the [other] commanderies and kingdoms to the encampments in Liaodong [Commandery].	Ban, G. and Dubs, H. H.: The history of the former Han dynasty, Waverly Press, 1938.	Hanshu, Annals of Emperor Zhao
-75	eastward		Liaodong		planned migration	六年春正月，募郡國徒築遼東玄菟城	In the sixth year, in the spring, the first month, convicts of the commanderies and kingdoms were solicited to build city walls in Liaodong and Xuantu [Commanderies].	Ban, G. and Dubs, H. H.: The history of the former Han dynasty, Waverly Press, 1938.	Hanshu, Annals of Emperor Zhao
-74
-73			Pingling		planned migration	本始元年春正月，募郡國吏民訾百萬以上徙平陵。	In [the period] Benshi, the first year, in the spring, the first month, officials and common people whose property was one million [cash] and over were solicited to move to Pingling.	Ban, G. and Dubs, H. H.: The history of the former Han dynasty, Waverly Press, 1938.	Hanshu, Annals of Emperor Xuan
-72			2) Pingling	2) 22,500	1) summary of the past 2) Planned migration	1)宣帝初即位…...長信少府勝獨曰：「武帝雖有攘四夷廣土斥境之功，然多殺士眾，竭民財力，奢泰亡度，天下虛耗，百姓流離，物故者過半。蝗蟲大起，赤地數千里，或人民相食，畜積至今未復。亡德澤於民，不宜為立廟樂。」 2) 二年春，以水衡錢為平陵，徙民起第宅	1) When Emperor Xuan ascended the throne… only Xiahou Sheng, the Superintendent of the Lesser Treasury, Changxin Palace (Changxin Shaofu) said, "Although Emperor Wu had the achievement of expanding the territory and repelling the barbarians, many soldiers were killed, and people's wealth was depleted. The extravagance left the nation empty. People were displaced and over half died. Locusts ravage…	1) by the author 2) Ban, G. and Dubs, H. H.: The history of the former Han dynasty, Waverly Press, 1938.	1) Hanshu, Biography of Xiahou Sheng 2) Hanshu, Annals of Emperor Xuan		The year is 72 BCE is also based on Zizhi Tongjian. Year and scale is also from Ge Jianxiong (2014),p161
-71					1) drought 2) war	1)大旱，郡国伤旱甚者，民毋出租赋，三辅民就贱者，且毋收事，尽四年。 2)…...獲單於父行及嫂、居次、名王、犁污都尉、千長、將以下三萬九千萬餘級，虜馬牛羊驢執橐駝七十餘萬......然匈奴民眾死傷而去者，及畜產遠移死于不可數勝…...其後漢出三千餘騎，為三道，並入匈奴，捕虜得數千人還。	1) There was a great drought. In those commanderies and kingdoms that suffered greatly from the drought, the people [were permitted] not to pay the land tax or capitation taxes, and those among the common people of the three capital commanderies who had reached the lowest [conditions] were temporarily not to have [taxes] collected [from them] nor to be made to serve. [This remission] was to be en…	1) Ban, G. and Dubs, H. H.: The history of the former Han dynasty, Waverly Press, 1938. 2) by the author	1) Hanshu, Annals of Emperor Xuan 2) Hanshu, Biography of Xiongnu	1) Luo, T.: The problem of vagrancy in the Han Dynasty (Luo, T.: The problem of vagrancy in the Han Dynasty (漢代的流民問題), Taiwan Student Book Publishing House, Taipei, 1989.), Taiwan Student Book Publishing House, Taipei, 1989.	The reference includes this as a record of vagrancy. However, although the text implies that common people had reached the lowest conditions, it does not directly mention vagrancy, moving people, etc.
-70					allowed movement	(本始)四年春正月，詔曰：「蓋聞農者興德之本也，今歲不登…...民以車船載穀入關者，得毋用傳。」	In the fourth year, in the spring, the first month, an imperial edict said, "Verily, [We] have heard that agriculture is the fundamental thing in making virtue flourish. [But] this year there has not been a good harvest. ... Common people who transport grain by cart or by boat through the [customs] barriers shall be permitted not to use passports."	Ban, G. and Dubs, H. H.: The history of the former Han dynasty, Waverly Press, 1938.	Hanshu, Annals of Emperor Xuan		It is during a time when going through the Hangu Pass were strictly controlled. This is one of the exceptions that food needed to be transported into Guanzhong, so the restriction on people's movement was lifted for a while.
-69
-68					1) garrison 2) surrender	1)地節二年，漢遣侍郎鄭吉、校尉司馬喜將免刑罪人田渠犁，積谷，欲以攻車師。 2)其秋，匈奴前所得西嗕居左地者，其君長以下數千人皆驅畜產行，與甌脫戰，所戰殺傷甚眾，遂南降漢。	1) In the second year of the Dijie reign period, the Han government sent Zhengji, a Gentleman in Attendance, and Sima Xi, the Colonel-Director, to lead exempted criminals to cultivate fields in Quli, [in order to] store food and prepare for the attack on Cheshi. 2) This autumn, the people of the Xiru tribe, formerly under the control of the Xiongnu and residing in the left territory, fled with th…	1) by the author 2) by the author	1)Hanshu, Traditions of the Western Regions 2)Hanshu, Biography of Xiongnu/Zizhi Tongjian
-67	eastward		1)Jiaodong	80000	1) vagrants returned 2) vagrants returned 3) war	1)三年春三月，詔曰：「蓋聞有功不賞，有罪不誅，雖唐虞猶不能以化天下。今膠東相成勞來不怠，流民自占八萬餘口，治有異等。其秩成中二千石，賜爵關內侯。」 2)冬十月...又詔曰：「池烃未御幸者，假與貧民。郡國宮館，勿復修治。流民還歸者，假公田，貸種、食，且勿算事。」 3)單於覆以車師王昆弟兜莫為車師王，收其餘民東徙，不敢居故地。	1) In the third year, in the spring, the third month, an imperial edict said, "Verily, [We] have heard that if anyone has merits and is not rewarded, or if anyone has committed crimes and is not punished, although [the ruler were] Tang Yao or Yu Shun, he would on that account not be able to improve the country. Now the Chancellor in [the kingdom of] Jiaodong, Wang Cheng, has treated [his people] …	1)Ban, G. and Dubs, H. H.: The history of the former Han dynasty, Waverly Press, 1938. 2)Ban, G. and Dubs, H. H.: The history of the former Han dynasty, Waverly Press, 1938. 3) by the author	1) Hanshu, Annals of Emperor Xuan/Hanshu, Biography of Upright Officials 2) Hanshu, Annals of Emperor Xuan 3) Hanshu, Biography of Xiongnu
-66
-65			Duling	22500	planned migration	元康元年春，以杜東原上為初陵，更名杜縣為杜陵。徙丞相、將軍、列侯、吏二千石、訾百萬者杜陵。	In [the period] Yuankang, the first year, in the spring, on the plain east of Du, the Emperor's tomb was made, and the name of Du Prefecture was changed to Duling [Prefecture. The residences of] the Lieutenant Chancellor, generals, marquises, and officials [ranking at] two thousand piculs whose property [amounted to] a million [cash] were moved to Duling.	Ban, G. and Dubs, H. H.: The history of the former Han dynasty, Waverly Press, 1938.	Hanshu, Annals of Emperor Xuan		The scale is estimated by Ge Jianxiong (2014), p.161. He considers this record is in 64 BCE. However, Hanshu, Annals of Emperor Yuan shows it should be 65 BCE.
-64
-63
-62
-61			1) west frontier	1) 60,000	1) garrison 2) garrison/ Temporary military colonies	1)時上已發三輔、太常徒弛刑，三河、潁川、沛郡、淮陽、汝南材官，金城、隴西、天水、安定、北地、上郡騎士、羌騎，與武威、張掖、酒泉太守各屯其郡者，合六萬人矣。 2)（趙充國）遂上屯田奏曰：臣聞兵者，所以明德除害也，故舉得於外，則福生於內，不可不慎。臣所將吏士馬牛食，月用糧谷十九萬九千六百三十斛，鹽千六百九十三斛，茭臥二十五萬二百八十六石......計度臨羌東至浩亹，羌虜故田及公田，民所未墾，可二千頃以上......臣前部士入山，伐材木大小六萬餘枚，皆在水次。願罷騎兵，留弛刑應募，及淮陽、汝南步兵與吏士私從者，合凡萬二百八十一人，用谷月二萬七千三百六十三斛，鹽三百八斛，分屯要害處。冰解漕下，繕鄉亭，浚溝渠，治湟驥以西道橋七十所，令可至鮮水左右。田事出，賦人二十畝。至四月草生，發郡騎及屬國胡騎伉健各千，倅馬什二，就草，為田者遊兵。以充入金城郡，益積畜，省大費。今大司農所轉谷至者，足支萬人一歲食…	1) At that time, the Emperor had dispatched the exempted convicts [from the districts under the control of] the Three Adjuncts and the Grand Master of Ceremonies and organized them as military units. [Together with] the local military officials from Sanhe, Yingchuan, Pei, Huaiyang, Runan [commanderies]; the carriers from Jincheng, Longxi, Tianshui, Anding, Beidi and Shang [commanderies]; the armi…	1) by the author 2) Hsu, C., 1980. Han Agriculture: The Formation of Early Chinese Agrarian Economy, 206 BC-AD 220 . University of Washington Press.	1) Hanshu, Biography of Zhao Chongguo/Zizhi Tongjian 2) Hanshu, Biography of Zhao Chonggguo/Zizhi Tongjian	Hsu, C., 1980. Han Agriculture: The Formation of Early Chinese Agrarian Economy, 206 BC-AD 220 . University of Washington Press.
-60		2) western frontier		1) over 10,000	1) surrender 2) abolish garrison	1) 秋，匈奴日逐王先贤掸将人众万馀来降。 2)明年五月，充國奏言：“羌本可五萬人軍，凡斬首七千六百級，降者三萬一千二百人，溺河湟饑餓死者五六千人，定計遺脫與煎鞏、黃羝俱亡者不過四千人。羌靡忘等自詭必得，請罷屯兵。”	1) In the autumn, the Xiongnu Zhuri King, Xianxian Shan, leading a multitude of more than ten thousand people, came to surrender to the Han Dynasty. 2) In the next year, in summer, in the fifth month, Zhao Chongguo submitted a memorial saying, “The total strength of the Qiang tribes and military forces was originally about 50,000. However, a total of 7,600 were beheaded, 31,200 people surrendered…	1)Ban, G. and Dubs, H. H.: The history of the former Han dynasty, Waverly Press, 1938. 2) by the author	1) Hanshu, Annals of Emperor Xuan 2) Hanshu, Biography of Zhao Chongguo
-59			Beiqing, Cheshi		garrison	匈奴益弱, 不得近西域。於是徙屯田, 田於北青鞭, 披莎車之地, 屯田校尉始屬都護	As the Xiongnu weakened over time, they could no longer extend their influence into the Western Regions. Thus, the Han government moved the garrison farms to Beiqing and divided specific areas for garrison farming in the Kingdom of Cheshi. The Garrison Colonel became part of the jurisdiction of the Protector General.	by the author	Hanshu, Traditions of the Western Regions
-58
-57
-56					surrender	冬十一月，匈奴呼鴟累單于帥眾來降，封為列侯。	In the winter, the eleventh month, the Xiongnu Chanyu Hu Chilei, leading his troop, came [to Han] and surrendered. He was enfeoffed as a full marquis.	Ban, G. and Dubs, H. H.: The history of the former Han dynasty, Waverly Press, 1938.	Hanshu, Annals of Emperor Xuan		see record of the next year
-55				0ver 50,000	surrender	(三年三月)單于閏氏子孫昆弟及呼鴟累單于、名王、右伊秩訾、且渠、當戶以下將眾五萬馀人來降歸義。…...置西河、北地屬國以處匈奴降者。	(in the third year, the third month)...the Run of a Chanyu, with her children, grandchildren, older and younger brothers, together with Chanyu Hu Chilei, and important kings, the Western Yizhizi, [also] Qiequ, Danghu, and [Xiongnu officials] subordinate [to them], leading a troop of more than fifty thousand people, have come and surrendered [to Us]...There were established [Chief Commandants of] …	Ban, G. and Dubs, H. H.: The history of the former Han dynasty, Waverly Press, 1938.	Hanshu, Annals of Emperor Xuan
-54
-53
-52
-51					surrender	自請願留居光祿塞下，有急保漢受降城	[Chanyu] asked to stay at Xu Guanglu's station, and prepared to defend the Shouxiangcheng (cities built to accept people who had surrendered to the Han) in case of emergencies.	by the author	Hanshu, Biography of Xiongnu
-50
-49
-48	1) westward	1) Guandong 2) Dependent state of Shang Commandery			1) lack of food 2) war 3)garrison	1)元帝初即位，穀貴民流…... 2) 元帝即位，為執金吾。上郡屬國歸義降胡萬馀人反去。 3) 至元帝時，覆置戊己校尉，屯田車師前王庭。	1) When Emperor Yuan first ascended to the throne, grain prices were high and many people were displaced… 2) When Emperor Yuan ascended to the throne, Feng Fengshi was appointed as the Superintendent of the Capital (Zhijinwu), and over 10,000 barbarians [who had surrendered to Han before] in the dependent state (shuguo) of Shang [commandery] went back to where they came from. 3) During the time o…	1)by the author 2)by the author 3)by the author	1) Hanshu, Biography of Du Yannian 2) Hanshu, Biography of Feng Fengshi 3) Hanshu, Traditions of the Western Regions
-47	westward	Guandong			calamities	今天下獨有關東，關東大者獨有齊楚，民眾久困，連年流離，離其城郭，相枕席於道路。	Now Guandong is the largest area of the state, and Qi [commandery] and Chu [Kingdom] are the largest areas of Guandong. The people of Guandong have long been impoverished. They have been displaced for consecutive years, leaving their homelands and lying beside the roads.	by the author	Hanshu, Biography of Jia Juanzhi
-46
-45
-44
-43	1) westward	1) Guandong			1) & 2) calamities	1)永光元年，春霜夏寒，日青亡光，上覆以詔條責曰：“郎有從東方來者，言民父子相棄。丞相、御史案事之吏匿不言邪？…...方今年歲未可預知也，即有水旱，其憂不細。…...”定國惶恐，上書自劾，歸侯印，乞骸骨。 2)廣德上書曰：「竊見關東困極，人民流離...」...後月餘，以歲惡民流，與丞相定國、大司馬車騎將軍史高俱乞骸骨。	1) In the first year of the Yongguang Reign Period, frost fell in the spring, and the summer was cold. The sun was pale blue and had no brightness. The Emperor issued a decree again, blaming officials, "An official from the east reported that the people [are suffering from hunger to the extent that] parents and children cannot even support each other. Are officials like the Imperial Counsellor an…	1) by the author 2) by the author	1) Hanshu, Biography of Yu Dingguo 2) Hanshu, Biography of Xue Guangde		1) This record follows right after the additional record in the 48 BC note column, therefore, it continues the description of the vagrancy issue since 48 BC.
-42	1) westward	1) Guandong		2) 60,000	1) calamities 2) garrison	1)二年春二月，詔曰：「…...然而陰陽未調，三光晻昧。元元大困，流散道路，盜賊並興。...」 2)永光二年秋，隴西羌彡姐旁種反......今反虜無慮三萬人，法當倍用六萬人。然羌戎弓矛之兵耳，器不犀利，可用四萬人，一月足以決。”丞相、御史、兩將軍皆以為民方收斂時，未可多發；萬人屯守之，且足......於是遣奉世將萬二千人騎，以將屯為名......奉世具上地形部眾多少之計，願益三萬六千人乃足以決事。書奏，天子大為發兵六萬餘人…...	1) In the second year, in the spring, the second month, an imperial edict said, "...But the Yin and Yang have not yet accorded [with each other], the three luminaries have been veiled and indistinct, the great multitude have suffered greatly, have wandered, and have been scattered on the highways and paths. Robbers and brigands have arisen simultaneously. ..." 2) In the second year of Yongguang r…	1) Ban, G. and Dubs, H. H.: The history of the former Han dynasty, Waverly Press, 1938. 2) by the author	1)Hanshu, Annal of Emperor Yuan 2)Hanshu, Biography of Feng Fengshi
-41
-40					1) Policy 2) Policy	1)詔曰：「…...頃者有司緣臣子之義，奏徙郡國民以奉園陵，令百姓遠棄先祖墳墓，破業失產，親戚別離，人懷思慕之心，家有不安之意。是以東垂被虛耗之害，關中有無聊之民，非久長之策也...」 2) 自元帝时，渭陵不复徙民起邑。	1) [an imperial edict said[, "...A short time ago, some high officials memorialized that, according to the principles [involved in the relationship of] a subject [to his ruler], common people from the commanderies and kingdoms should be transported [to Our tomb] to uphold [the sacrifices at Our] funerary park and tomb, [thus] causing the people to leave and abandon the tombs and mounds of their d…	1) Ban, G. and Dubs, H. H.: The history of the former Han dynasty, Waverly Press, 1938. 2) by the author	1) Hanshu, Annal of Emperor Yuan 2) Hanshu, Biography of Chen Tang
-39
-38
-37
-36					garrison	使護西域騎都尉甘延壽、副校尉陳湯橋發戊己校尉屯田吏士及西域胡兵攻郅支單於。	...the Chief Commandant of Cavalry who had been sent out as Protector-[general] of the Western Frontier Regions, Gan Yanshou, and his Associate, Colonel Chen Tang, by fraud mobilized the officials and troops of the agricultural garrison under the Muji Colonel, together with the northwestern barbarian (hu) troops of the Western Frontier Regions, and attacked Chanyu Zhizhi.	Ban, G. and Dubs, H. H.: The history of the former Han dynasty, Waverly Press, 1938.
-35
-34
-33
-32					vagrants	成帝初即位，舉為博士，數使錄冤獄，行風俗，振贍流民，奉使稱旨，由是知名。	At the accession of Emperor Cheng, [Kong Guang] was appointed Academician (Boshi). He was entrusted with the tasks of rectifying wrongful convictions, reforming customs, and providing relief to vagrants [who suffered from calamities]. He always successfully fulfilled his duties, therefore his good reputation was widespread throughout the court and among the people.	by the author	Hanshu, Biography of Kong Guang
-31
-30
-29	relocate	Guandong		over 97,000	Yellow river flood/ planned migration	河果決於館陶及東郡金堤，泛溢兗、豫，入平原、千乘、濟南，凡灌四郡三十二縣，…… 徙民避水居丘陵，九萬七千餘口。	The Yellow River burst its banks at the Jin dike in Guantao [County] and Dong Commanderies, inundating Yanzhou and Yuzhou [provinces], reaching into Pingyuan, Qiancheng and Jinan [Commanderies], flooding a total of four commanderies and thirty-two counties... [the Emperor ordered to] relocate over 97,000 people to higher land, avoiding the floods.	by the author	Hanshu, Treatise on Rivers and Canals		full relevant text: 河果決於館陶及東郡金堤，泛溢兗、豫，入平原、千乘、濟南，凡灌四郡三十二縣，…...遣大司農非調調均錢穀河決所灌之郡，謁者二人發河南以東漕船五百馏，徙民避水居丘陵，九萬七千餘口。
-28	westward	You Province (Guandong)	Hangu Pass		1) & 2) drought and famine	1) 至河平元年三月，旱，傷麥，民食榆皮…. 流民入函谷關。 2)頃之，使行流民幽州，舉奏刺史二千石勞來有意者，言勃海鹽池可且勿禁，以救民急。	1) In the first year of the Heping reign period, in the 3rd month, (there was) a drought, wheat plants were injured, and people had to live on elm bark... the vagrants fled into the Hangu Pass... 2) …shortly thereafter, [the Emperor] sent [Ping Dang] to visit and investigate the vagrancy situation in You [Province]. He submitted a report recommending diligent and dedicated regional inspectors and…	1) by the author 2) by the author	1)Hanshu, Treatise on Astronomy/ Zizhi Tongjian 2)Hanshu, Biography of Ping Dang		2) This record is following the narrative of "上納其言，下詔覆太上皇寢廟園。" This event, the restoration of the Shrine and park dedicated to Gaodi's father, was in 28 BC according to Hanshu, Annals of Emperor Cheng
-27
-26					yellow river flood	後二歲，河復決平原，流入濟南、千乘…...如此，數郡種不得下，民人流散，盜賊將生…」	Two years later, the [Yellow] River dikes were broken in Pingyuan [Commandery] again, flooding into Jinan and Qiancheng [Commanderies]… [in case the restoration is not successful], the farmlands of several commanderies cannot be planted with grain, so that the people will flee and it is likely that banditry will occur.	by the author	Hanshu, Treatise on Rivers and Canals/Zizhi Tongjian		Full text: 後二歲，河復決平原，流入濟南、千乘，所壞敗者半建始時，復遣王延世治之。杜欽說大將軍王鳳，以為「前河決，丞相史楊焉言延世受焉術以塞之，蔽不肯見。今獨任延世，延世見前塞之易，恐其慮害不深。又審如焉言，延世之巧，反不如焉。且水勢各異，不博議利害而任一人，如使不及今冬成，來春桃華水盛，必羨溢，有填淤反壤之害。如此，數郡種不得下，民人流散，盜賊將生，雖重誅延世，無益於事…」It is an assumption in case of vagrancy happen, therefore not officially counted.
-25					Yellow River flood	避水它郡國，在所冗餘。謹遇以文理，無令失職。	[The imperial edict said], "...and for those who have gone to other commanderies and kingdoms to escape the floods, the places in which they are, are to distribute food to them.[The legates] are to treat them carefully, with courtesy and equity, and are not to cause them to lose their occupations.... "	Ban, G. and Dubs, H. H.: The history of the former Han dynasty, Waverly Press, 1938.	Hanshu, Annals of Emperor Cheng	Luo, T.: The problem of vagrancy in the Han Dynasty (漢代的流民問題), Taiwan Student Book Publishing House, Taipei, 1989.
-24
-23	westward	Guandong	Hangu Pass		flood	秋，關東大水，流民欲人函谷、天井、壺口、五阮關者，勿苛留。 遣諫大夫博士分行視。	In the autumn, there was a flood east of [Han-ku] Pass. [An imperial edict ordered that] vagrant people who wished to enter through Hangu [Pass],Tianjing [Pass], Hukou, or Wuyuan Pass should not be treated harshly or detained. [The Emperor] sent Grandee-remonstrants and Erudits separately to inspect and observe.	Ban, G. and Dubs, H. H.: The history of the former Han dynasty, Waverly Press, 1938.	Hanshu, Annals of Emperor Cheng
-22
-21
-20
-19			Changling		planned migration	夏，徙郡國豪桀貲五百萬以上五千戶於昌陵。	In the summer,braves and stalwarts from the commanderies and kingdoms whose property was five million [cash] or more, [to the number of] five thousand households, were moved to Changling.	Ban, G. and Dubs, H. H.: The history of the former Han dynasty, Waverly Press, 1938.	Hanshu, Annals of Emperor Cheng
-18
-17	westward	Guandong (Qing, You and Ji Provinces)	Hangu Pass		bad governance and water related calamities	四年春正月，詔曰：「數敕有司，務行寬大，而禁苛暴，訖今不改。一人有辜，舉宗拘繫，農民失業，怨恨者眾，傷害和氣，水旱為災，關東流冗者眾，青、幽、冀部尤劇，朕甚痛焉。未聞在位有惻然者，孰當助朕憂之！已遣使者循行郡國。被災害什四以上，民貲不滿三萬，勿出租賦。逋貸未入，皆勿收。流民欲入關，輒籍內。所之郡國，謹遇以理，務有以全活之，思稱朕意。」	1) In the fourth year, in the spring, the first month, an imperial edict said, "[We] have several times issued a decree to the high officials that they should take care to be liberal and large-minded in their actions and should prohibit tyranny and oppression, [but] down to the present [their behavior] has not changed. If one person commits a crime, they recommend that his clan should be arrested…	Ban, G. and Dubs, H. H.: The history of the former Han dynasty, Waverly Press, 1938.	Hanshu, Annals of Emperor Cheng
-16		Guandong		hundreds of thousands	calamities and famine	向上疏諫：「…...死者恨於下，生者愁於上，怨氣感動陰陽，因之以飢饉，物故流離失所以十萬數，臣甚惽焉…...」	[Liu Xiang] submitted a memorial to Emperor Cheng, suggesting, "…The deceased harbor resentment underground, and the living suffer from great concerns. Resentment permeates the balance of Yin and Yang. In addition, due to the famine, the dead and displaced number in the hundreds of thousands. I am deeply saddened..."	by the author	Hanshu, Biography of Prince Yuan of Chu	Luo, T.: The problem of vagrancy in the Han Dynasty (漢代的流民問題), Taiwan Student Book Publishing House, Taipei, 1989.
-15		Guandong		millions	calamities and famine	"…...百姓財竭力盡，愁恨感天，災異婁降，飢饉仍臻。流散冗餘，餵死於道，以百萬數…..."	[Gu Yong] said, ”…The people's wealth has been depleted, and their labor has been exhausted. Their concerns and resentment moved the Heavenly King. Calamities and ominous signs appeared many times, and famines occurred frequently. Countless people fled from their homes to search for food. Millions starved to death along the roads...“	by the author	Hanshu, Biography of Gu Yong	Luo, T.: The problem of vagrancy in the Han Dynasty (漢代的流民問題), Taiwan Student Book Publishing House, Taipei, 1989.
-14	return	Changling			refers to previous time	......是時起昌陵，作者數萬人，徙郡國吏民五千餘戶以奉陵邑。作治五年不成，乃罷昌陵，還徙家。	…at that time the construction of Changling started. Tens of thousands of workers were involved, and over 5,000 households from kingdoms and commanderies were moved to serve the new town. The construction was not finished after five years, and it ceased. All the relocated households were sent back to where they were originally from.	by the author	Hanshu, Treatise on the Five Elements
-13
-12					flood and bad harvests	往年郡國二十一傷於水災，禾黍不入。今年蠶麥咸惡。百川沸騰，江河溢決，大水泛濫郡國十五有餘。比年喪稼，時過無宿麥。百姓失業流散，群輩守關。	"Previously, twenty-one commanderies and kingdoms were damaged by floods, resulting in bad harvests of grains (common millet and spiked millet). This year, both silkworms and wheat are not thriving. Rivers surged and the Yangtze and Yellow Rivers overflowed, causing floods in over fifteen commanderies and kingdoms. Crops have not been harvested for consecutive years. The right seasons for farming…	by the author	Hanshu, Biography of Gu Yong
-11
-10
-9
-8
-7					1) calamities and famines 2) An assumption of water management	1)上遂賜冊曰：「...惟君登位，於今十年，災害並臻，民被飢餓，加以疾疫溺死，關門牡開，失國守備，盜賊黨輩。…...間者郡國谷雖頗孰，百姓不足者尚眾。前去城郭，未能盡還，夙夜未嘗忘焉。」 2) 今行上策，徙冀州之民當水沖者…...	1) …an imperial edict was sent [to Zhai], ”…you have been in this position for ten years, various calamities occured together. People are starving and suffering from diseases and plagues. Door locks disappeared and the state is not well-defended. There are numerous bandits... Recently, although most commanderies have harvests, many people still suffer from hunger. People who went to guard the tow…	1) by the author 2) by the author	1) Hanshu, Biography of Zhai Fangjin 2) Hanshu, Treatise on Rivers and Canals	1)Luo, T.: The problem of vagrancy in the Han Dynasty (漢代的流民問題), Taiwan Student Book Publishing House, Taipei, 1989.	1) full text: 上遂賜冊曰：「...惟君登位，於今十年，災害並臻，民被飢餓，加以疾疫溺死，關門牡開，失國守備，盜賊黨輩。吏民殘賊，毆殺良民，斷獄歲多前。欲輔朕富民便安元元之念。間者郡國谷雖頗孰，百姓不足者尚眾，前去城郭，未能盡還，夙夜未嘗忘焉。」
-6					Dismiss	侍中騎都尉新成侯趙欽、成陽侯趙訢皆有罪，免為庶人，徙遼西。	The Palace Attendant and Colonel of Cavalry, the Marquis of Xincheng,Zhao Qin, and the Marquis of Chengyang, Zhao Xin, who had both committed crimes, were dismissed [from their titles], made commoners, and exiled to the Liaoxi [Commandery].	Ban, G. and Dubs, H. H.: The history of the former Han dynasty, Waverly Press, 1938.	Hanshu, Annals of Emperor Ai
-5					1)calamities and famines 2)calamities and famines 3) Policy 4) Policy	1)...策免光曰：「…陰陽錯謬，歲比不登，天下空虛，百姓饑饉，父子分散，流離道路，以十萬數…」 2)...遂策免丹曰：「…...間者陰陽不調，寒暑失常，變異婁臻，山崩地震，河決泉涌，流殺人民，百姓流連，無所歸心…」 3)七月，以渭城西北原上永陵亭部為初陵。勿徙郡國民，使得自安。 4) 發陳留、濟陰近郡國五萬人穿復土	1)The (balance) of Yin and Yang is disrupted, and there have been poor harvests for consecutive years. The granaries of the empire are empty and people are starving. Families are separated on the way to relocate elsewhere. There are hundreds of thousands [who have been affected]. 2) The Emperor dismissed Shi Dan, saying, "...recently, the balance of Yin and Yang is disrupted, and the cold and war…	1) By the author 2) By the author 3) Ban, G. and Dubs, H. H.: The history of the former Han dynasty, Waverly Press, 1938. 4)Ban, G. and Dubs, H. H.: The history of the former Han dynasty, Waverly Press, 1938.	1) Hanshu, Biography of Kong Guang 2) Hanshu, Biography of Shi Dan 3) Hanshu, Annals of Emperor Ai		2) full text: 遂策免丹曰：「夫三公者，朕之腹心也，輔善相過，匡率百僚，和合天下者也。朕既不明，委政於公，間者陰陽不調，寒暑失常，變異婁臻，山崩地震，河決泉涌，流殺人民，百姓流連，無所歸心，司空之職尤廢焉。…」
-4
-3					1) calamities, famines and bad governence	宣以諫大夫從其後，上書諫：「...國家空虛，用度不足。民流亡，去城郭，盜賊並起，吏為殘賊，歲增於前。凡民有七亡：陰陽不和，水旱為災，一亡也；縣官重責更賦租稅，二亡也；貪吏並公，受取不已，三亡也；豪強大姓蠶食亡厭，四亡也；苛吏繇役，失農桑時…...六亡也；盜賊劫略，取民財物，七亡也。」	Bao Xuan, the Advisory Counsellor, submitted a petition to the Emperor, “…the national treasury is empty, and the funds are insufficient. The people are fleeing, leaving their towns and cities, and bandits are on the rise. Officials harm the common folk, and the situation gets increasingly worse each year. There are seven causes for the unemployment and displacement of the people: first, the dish…	by the author	Hanshu, Biography of Bao Xuan
-2
-1
1
2		Guandong mainly Qing Province	Anming County (partially)		droughts and locusts/planned migration	郡國大旱，蝗，青州尤甚，民流亡。安漢公、四輔、三公、卿大夫、吏民為百姓困乏獻其田宅者二百三十人，以口賦貧民。遣使者捕蝗，民捕蝗詣吏，以石鬥受錢。天下民趙不滿二萬，及被災之郡不滿十萬，勿租稅。民疾疫者，舍空邸第為置醫藥…...以為安民縣，起官寺巿里，募徙貧民，縣次給食。至徙所，賜田宅什器，假與犂、牛、種、食。	In the commanderies and kingdoms there was a great drought and [plague of] locusts; in Qing Province it was especially severe, so that its common people became vagrants. The Duke Who Gives Tranquillity to the Han [Dynasty, Wang Mang], the four Coadjutors [Kong Guang, Wang Mang, Wang Shun, and Zhen Feng], the three highest ministers, the high ministers, grandees, officials, and common people, 230 …	Ban, G. and Dubs, H. H.: The history of the former Han dynasty, Waverly Press, 1938.	Hanshu, Annas of Emperor Ping
3
4				thousands and ten-thousands	1) &2) planned migration	1) 又增法五十條，犯者徙之西海。徙者以千萬數，民始怨矣。 2) 置西海郡，徙天下犯禁者處之。	1) He also added fifty items to the laws. Offenders were transported to Xihai [Commandery]. Those who were transported were counted by the thousands and ten-thousands, so that the common people for the first [time] held grudges [against Wang Mang]. 2) Xihai Commandery was established, and those in the empire who had violated the prohibitions were exiled to inhabit it.	1) Ban, G. and Dubs, H. H.: The history of the former Han dynasty, Waverly Press, 1938. 2) Ban, G. and Dubs, H. H.: The history of the former Han dynasty, Waverly Press, 1938.	1) Hanshu, Biography of Wang Mang 2) Hanshu, Annals of Emperor Ping		the place was taken back by Qiang very quickly.
5
6
7
8
