# Supplementary material for: Climatic and societal impacts of volcanic eruptions in the Western Han Dynasty (206 BCE–8 CE): a comparative study.
Source: Copernicus journal article supplement (doi:10.5194/cp-21-2061-2025), 2025-11-07
Supplement: Supplementary file [file cp-21-2061-2025-supplement-title-page.pdf › cp-21-2061-2025-supplement-title-page.pdf]

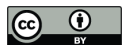

## *Supplement of*

# **Climatic and societal impacts of volcanic eruptions in the Western Han Dynasty (206 BCE–8 CE): a comparative study**

**Zhen Yang and Francis Ludlow**

*Correspondence to:* Zhen Yang (zhyang@tcd.ie)

- cp-21-2061-2025-supplement-title-page.pdf
- Notes for the tables- version 2.docx
- Table S1 Climate records of the Western Han Dynasty- version 2.xlsx
- Table S2 Key policy changes in 180-150 BCE (Western Han Dynasty)-version 2.xlsx
- Table S3 Key policy changes in 60-30 BCE (Western Han Dynasty)-version 2.xlsx
- Table S4 Records of harvest conditions in the Western Han Dynasty-version 2.xlsx
- Table S5 Records of population changes in the Western Han Dynasty-version 2.xlsx
- Translations and the Original Texts.pdf

The copyright of individual parts of the supplement might differ from the article licence.
